# Supplementary material
Source: Research Square preprint supplement (doi:10.21203/rs.3.rs-10439752/v1)
Supplement: Supplementary file 1 [file 8413aca36f9d0bfc54bee044.docx]

Changing malaria infection prevalence in Ghana: a multi-diagnostic spatiotemporal analysis

Authors list

Samuel Oppong1,2,3*, Nana Yaw Peprah3, Wahjib Mohammed3, Kefyalew Addis Alene1,2, Punam Amratia2,4, Tasmin Symons1,2, Hilarius Abiwu3, Peter Gething1,2

**Author affiliations**

1Building 400, School of Population Health, Curtin University, Kent Street, Bentley, 6102, Western Australia, Australia

2The Kids Research Institute Australia, 15 Hospital Avenue, Nedlands, 6009, Western Australia, Australia

3National Malaria Elimination Programme, Ghana Health Service, P.O. Box KB 493, Korle-Bu, Accra, Ghana

4Malaria Atlas Project-East Africa Node, Ifakara Health Institute, Dar es Salam, Tanzania

*Corresponding author

*Corresponding author email*

[*s.oppong@postgrad.curtin.edu.au*](mailto:s.oppong@postgrad.curtin.edu.au)*, Samuel.oppong@thekids.org.au*

Table of Contents

[Supplementary Methods 4](#_Toc235006149)

[Variables 4](#_Toc235006150)

[Distribution of survey data 4](#_Toc235006151)

[Covariates 5](#_Toc235006152)

[Exploratory analysis 6](#_Toc235006153)

[Clusters with missing covariates 7](#_Toc235006154)

[Exploring relationships 7](#_Toc235006155)

[Relationship between covariates 8](#_Toc235006156)

[Model selection 10](#_Toc235006157)

[Model structure 12](#_Toc235006158)

[Results 12](#_Toc235006159)

[Covariate effects 12](#_Toc235006160)

[Model selection 13](#_Toc235006161)

[Spatial and temporal random effects 14](#_Toc235006162)

[Model validation 16](#_Toc235006163)

[In sample model validation 16](#_Toc235006164)

[Out of sample model validation 17](#_Toc235006165)

[Predicted malaria prevalence 18](#_Toc235006166)

[Prediction maps with 95% Credible interval 19](#_Toc235006167)

[Microscopy Predicted Prevalence maps 19](#_Toc235006168)

[RDT predicted prevalence maps 22](#_Toc235006169)

[Stratification 25](#_Toc235006170)

[References 27](#_Toc235006171)

Supplementary Tables

[Supplementary Table 1: Proposed covariates, spatial resolution and sources 4](#_Toc235005773)

[Supplementary Table 2: Number of clusters with missing covariates overall 6](#_Toc235005774)

[Supplementary table 3: Covariates maintained after assessment of multicollinearity using Variance Inflation Factor (VIF) 8](#_Toc235005775)

[Supplementary Table 4: Results of non-spatial model to select the best temporal structure 9](#_Toc235005776)

[Supplementary Table 5: Candidate models considered and their unique components 10](#_Toc235005777)

[Supplementary Table 6: Results of model selection process showing DIC and WAICs of candidate models considered 12](#_Toc235005778)

[Supplementary Table 7: Relative malaria risk for each year by diagnostic method 13](#_Toc235005779)

[Supplementary Table 8: Summary table of results from cross validation methods 16](#_Toc235005780)

[Supplementary Table 9: Predicted microscopy and RDT prevalence by year with 95% credible intervals 17](#_Toc235005781)

Supplementary Figures

[Supplementary Figure 1: Density distribution of Months of sampling per year 4](#_Toc235005808)

[Supplementary Figure 2: Plot of relationship between outcome variable and covariates by diagnostic methods 8](#_Toc235005809)

[Supplementary Figure 3: Correlation matrix of relationship between each pair of covariates 10](#_Toc235005810)

[Figure 4: Posterior means (Odds ratio) of model covariates and corresponding 95% credible intervals. Red vertical line indicates reference value for considering a covariate important. Covariates with credible interval bands touching/crossing the red line are considered not important to malaria prevalence in the model. 13](#_Toc235005811)

[Supplementary Figure 5: Year-on-year effect of malaria prevalence by diagnostic method with 95% credible intervals (blue lines). Grey horizontal line indicate reference where no change was observed between years. 14](#_Toc235005812)

[Supplementary Figure 6: Spatial range and Matern correlation densities 15](#_Toc235005813)

[Supplementary Figure 7: Spatial patterns of underlying malaria risk by method for each year 15](#_Toc235005814)

[Supplementary Figure 8: Empirical semi-variogram and fitted model for microscopy and RDT prevalence showing distance where spatial locations become independent 16](#_Toc235005815)

[Supplementary Figure 9: In sample correlation plot between observed and predicted malaria prevalence by diagnostic method 17](#_Toc235005816)

[Supplementary Figure 10: Cross-validation plots for spatial, temporal and spatio-temporal strategies. 18](#_Toc235005817)

[Supplementary figure 11: Prediction maps of P. falciparum malaria by microscopy for Ghana from 2011 to 2025. There was general decline in malaria prevalence across the years. Few areas in the Western and Eastern region (close to the Volta lake) showed relatively high prevalence in 2025. 22](#_Toc235005818)

[Supplementary figure 12: Prediction maps of P. falciparum malaria by RDT for Ghana from 2011 to 2025 with 95% credible intervals. There was general decline in malaria prevalence across the years. Few areas in the Western, Savannah and Eastern region (close to the Volta lake) showed relatively high prevalence 25](#_Toc235005819)

[Supplementary figure 13: Proportionr of districts in different prevalence categories for each method in 2025 in Ghana 26](#_Toc235005820)

# Supplementary Methods

## Variables

In this project, we analysed data from sampled households that had eligible children tested for malaria parasite using microscopy and RDT. Information extracted included: cluster id, household id, child id, interview month, interview year, status of consent for malaria testing, results for RDT testing, results for microscopy testing and cluster coordinates (longitude and latitude). We created a variable we named examined which was coded as one (1) if a child was granted consent by primary caregiver and had a result for either RDT or microscopy and zero (0) otherwise. RDT results were recoded as 1 if positive and 0 if negative. For microscopy results, we filtered out results for other malaria parasite species other than *P. falciparum*. In the case of mixed infection (infection with more than one malaria parasite), we maintained results that included *P. falciparum*. We then recoded microscopy result as 1 if *P. falciparum* was seen and 0 if not seen. Since geographic coordinates where unique at cluster level but not at child level, we aggregated the data for each survey month and year by cluster. Thus, for each cluster year and month, we derived the sums of children examined, number positive for RDT and number positive for microscopy. For each cluster, we also generated the start/end month and start/ end year of sampling by finding the first and last interview month and year respectively.

All surveys, except those from 2014 and 2017, had data available for both microscopy result and RDT result. Years 2014 and 2017 had only data on RDT results available. Data for 2023 were from data collection exercise conducted in January 2023 as part of the 2022 GDHS. Thus, data for this project included 719 sites from 2011, 417 in 2014, 183 in 2016, 85 sites in 2017, 181 in 2019, 501 in 2022 and 77 in 2023. Figure 2 shows the location of sampled clusters for each survey year while the months within which clusters were surveyed in each survey year are shown in Supplementary Figure 1. The analysis was conducted with R (version 4.4.3)1.

## Distribution of survey data

We first mapped the number of children sampled each month in each year for the two diagnostic methods to visualise the temporal differences in observations for the two methods.


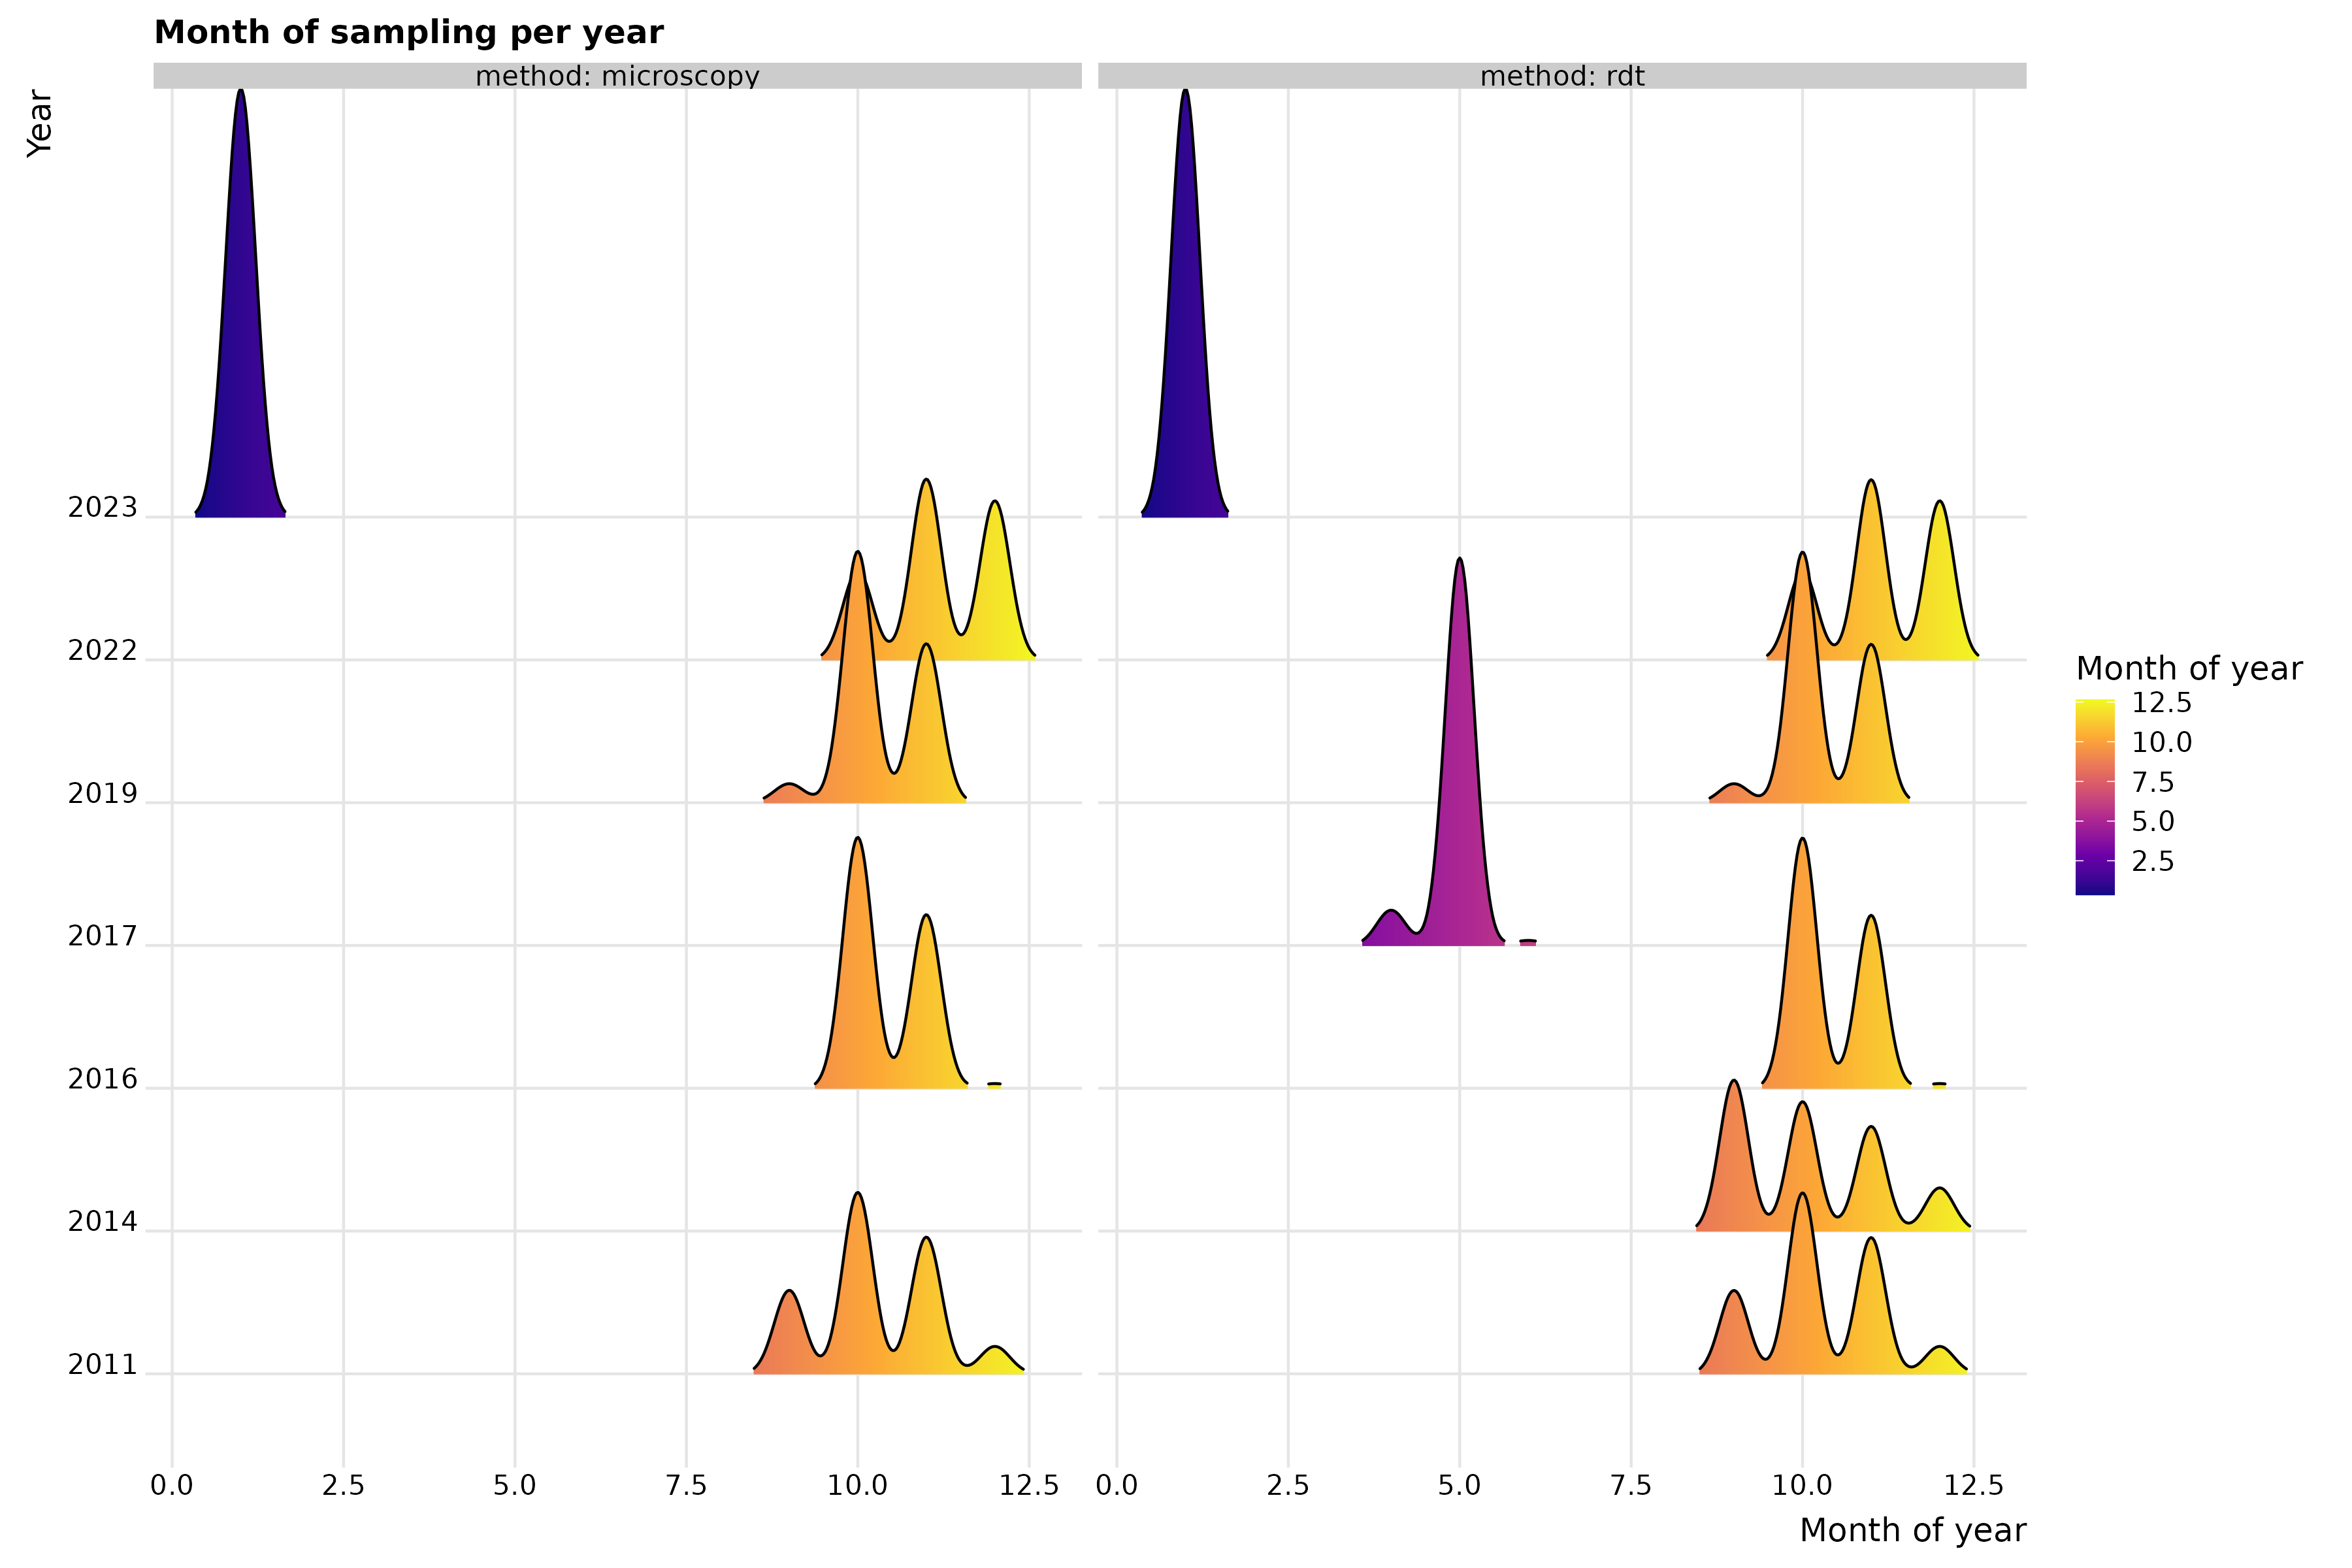


Supplementary Figure 1: Density distribution of Months of sampling per year

## Covariates

A total of 31 covariates were considered a priori based on their association with malaria from literature. These covariates were then assessed for multiple collinearity using variable inflation factor (VIF).

Supplementary Table 1: Proposed covariates, spatial resolution and sources

| Covariates | Description | Temporality | Variable selection | Source |
| --- | --- | --- | --- | --- |
| Travel time to cities (travel_cities) | Distance to cities with population >50,000 | Static | Yes | Nelson2 |
| Elevation (elev) | Elevation as measured by the Shuttle Radar Topography Mission (SRTM) | Static | Yes | SRTM derivative3 |
| Slope | GIS-derived surface calculated from SRTM elevation surface | Static | Yes | MAP (from SRTM3) |
| Nighttime lights | Index that measures the presence of lights from towns, cities and other sites with persistent lighting | Annual | Yes | NOAA4 |
| Urbanization (urban) | Proportion of area considered urban | Static | Yes | MAP (from SRTM5) |
| Population counts (pop) | Estimated population per 1 km × 1 km pixel | Annual | Yes | WorldPop6 |
| EVI | Enhanced vegetation index | Monthly | Lag 0, 1, 2 | MODIS derivative7 |
| LST_day | Daytime land surface temperature | Monthly | Lag 0, 1, 2 | MODIS derivative8 |
| LST_diurdiff | Diurnal difference in land surface temperature | Monthly | Lag 0, 1, 2 | MODIS derivative8 |
| LST_night | Night-time land surface temperature | Monthly | Lag 0, 1, 2 | MODIS derivative8 |
| TCB | Tasseled cap brightness; measure of land reflectance | Monthly | Lag 0, 1, 2 | MODIS derivative9 |
| TCW | Tasseled cap wetness | Monthly | Lag 0, 1, 2 | MODIS derivative9 |
| TSI | Temperature suitability index | Monthly | Lag 0, 1, 2 | MAP10 |
| CHIRPS | Climate Hazards Group Infrared Precipitation with Station Data | Monthly | Lag 0, 1, 2 | CHIRPS11 |

## Exploratory analysis

We examined the full data for data quality issues. Specifically, we looked for outliers, investigated clusters with missing covariate values, and determined the spread of the cluster values around the mean for both diagnostic methods. We omitted clusters with missing covariate values since they were a very small proportion – 0.032% (Supplementary Table 2). We then explored the relationship between each covariate and the outcome variable by visualizing the relationship (Supplementary Figure 2). This was to determine whether the relationship between the outcome and the covariate differed by the diagnostic method. Additionally, we checked for dependency by visualizing the distribution of the of sampled locations on the map of Ghana. This enabled us to determine if there is enough spread of the spatial points across the country for each method and across the years in the data.

## Clusters with missing covariates

We assessed the data for missingness and observed a total of 125 cluster locations with missing covariate values. We excluded these locations since we considered their effect to be negligible.

Supplementary Table 2: Number of clusters with missing covariates overall

|  | Year | Total number of clusters | Number of clusters with missing covariates | Proportion of missing covariates |
| --- | --- | --- | --- | --- |
| 1 | 2011 | 1452 | 8 | 0.00551 |
| 2 | 2014 | 419 | 0 | 0 |
| 3 | 2016 | 384 | 18 | 0.0469 |
| 4 | 2017 | 90 | 5 | 0.0556 |
| 5 | 2019 | 384 | 22 | 0.0573 |
| 6 | 2022 | 1070 | 66 | 0.0617 |
| 7 | 2023 | 160 | 6 | 0.0375 |
|  | Total |  | 125 | 0.032 |

## Exploring relationships

Each covariate was plotted against the outcome (malaria prevalence) for both diagnostic methods to visual the relationship. We noted a non-linear relationship between the outcome and all the covariates

| 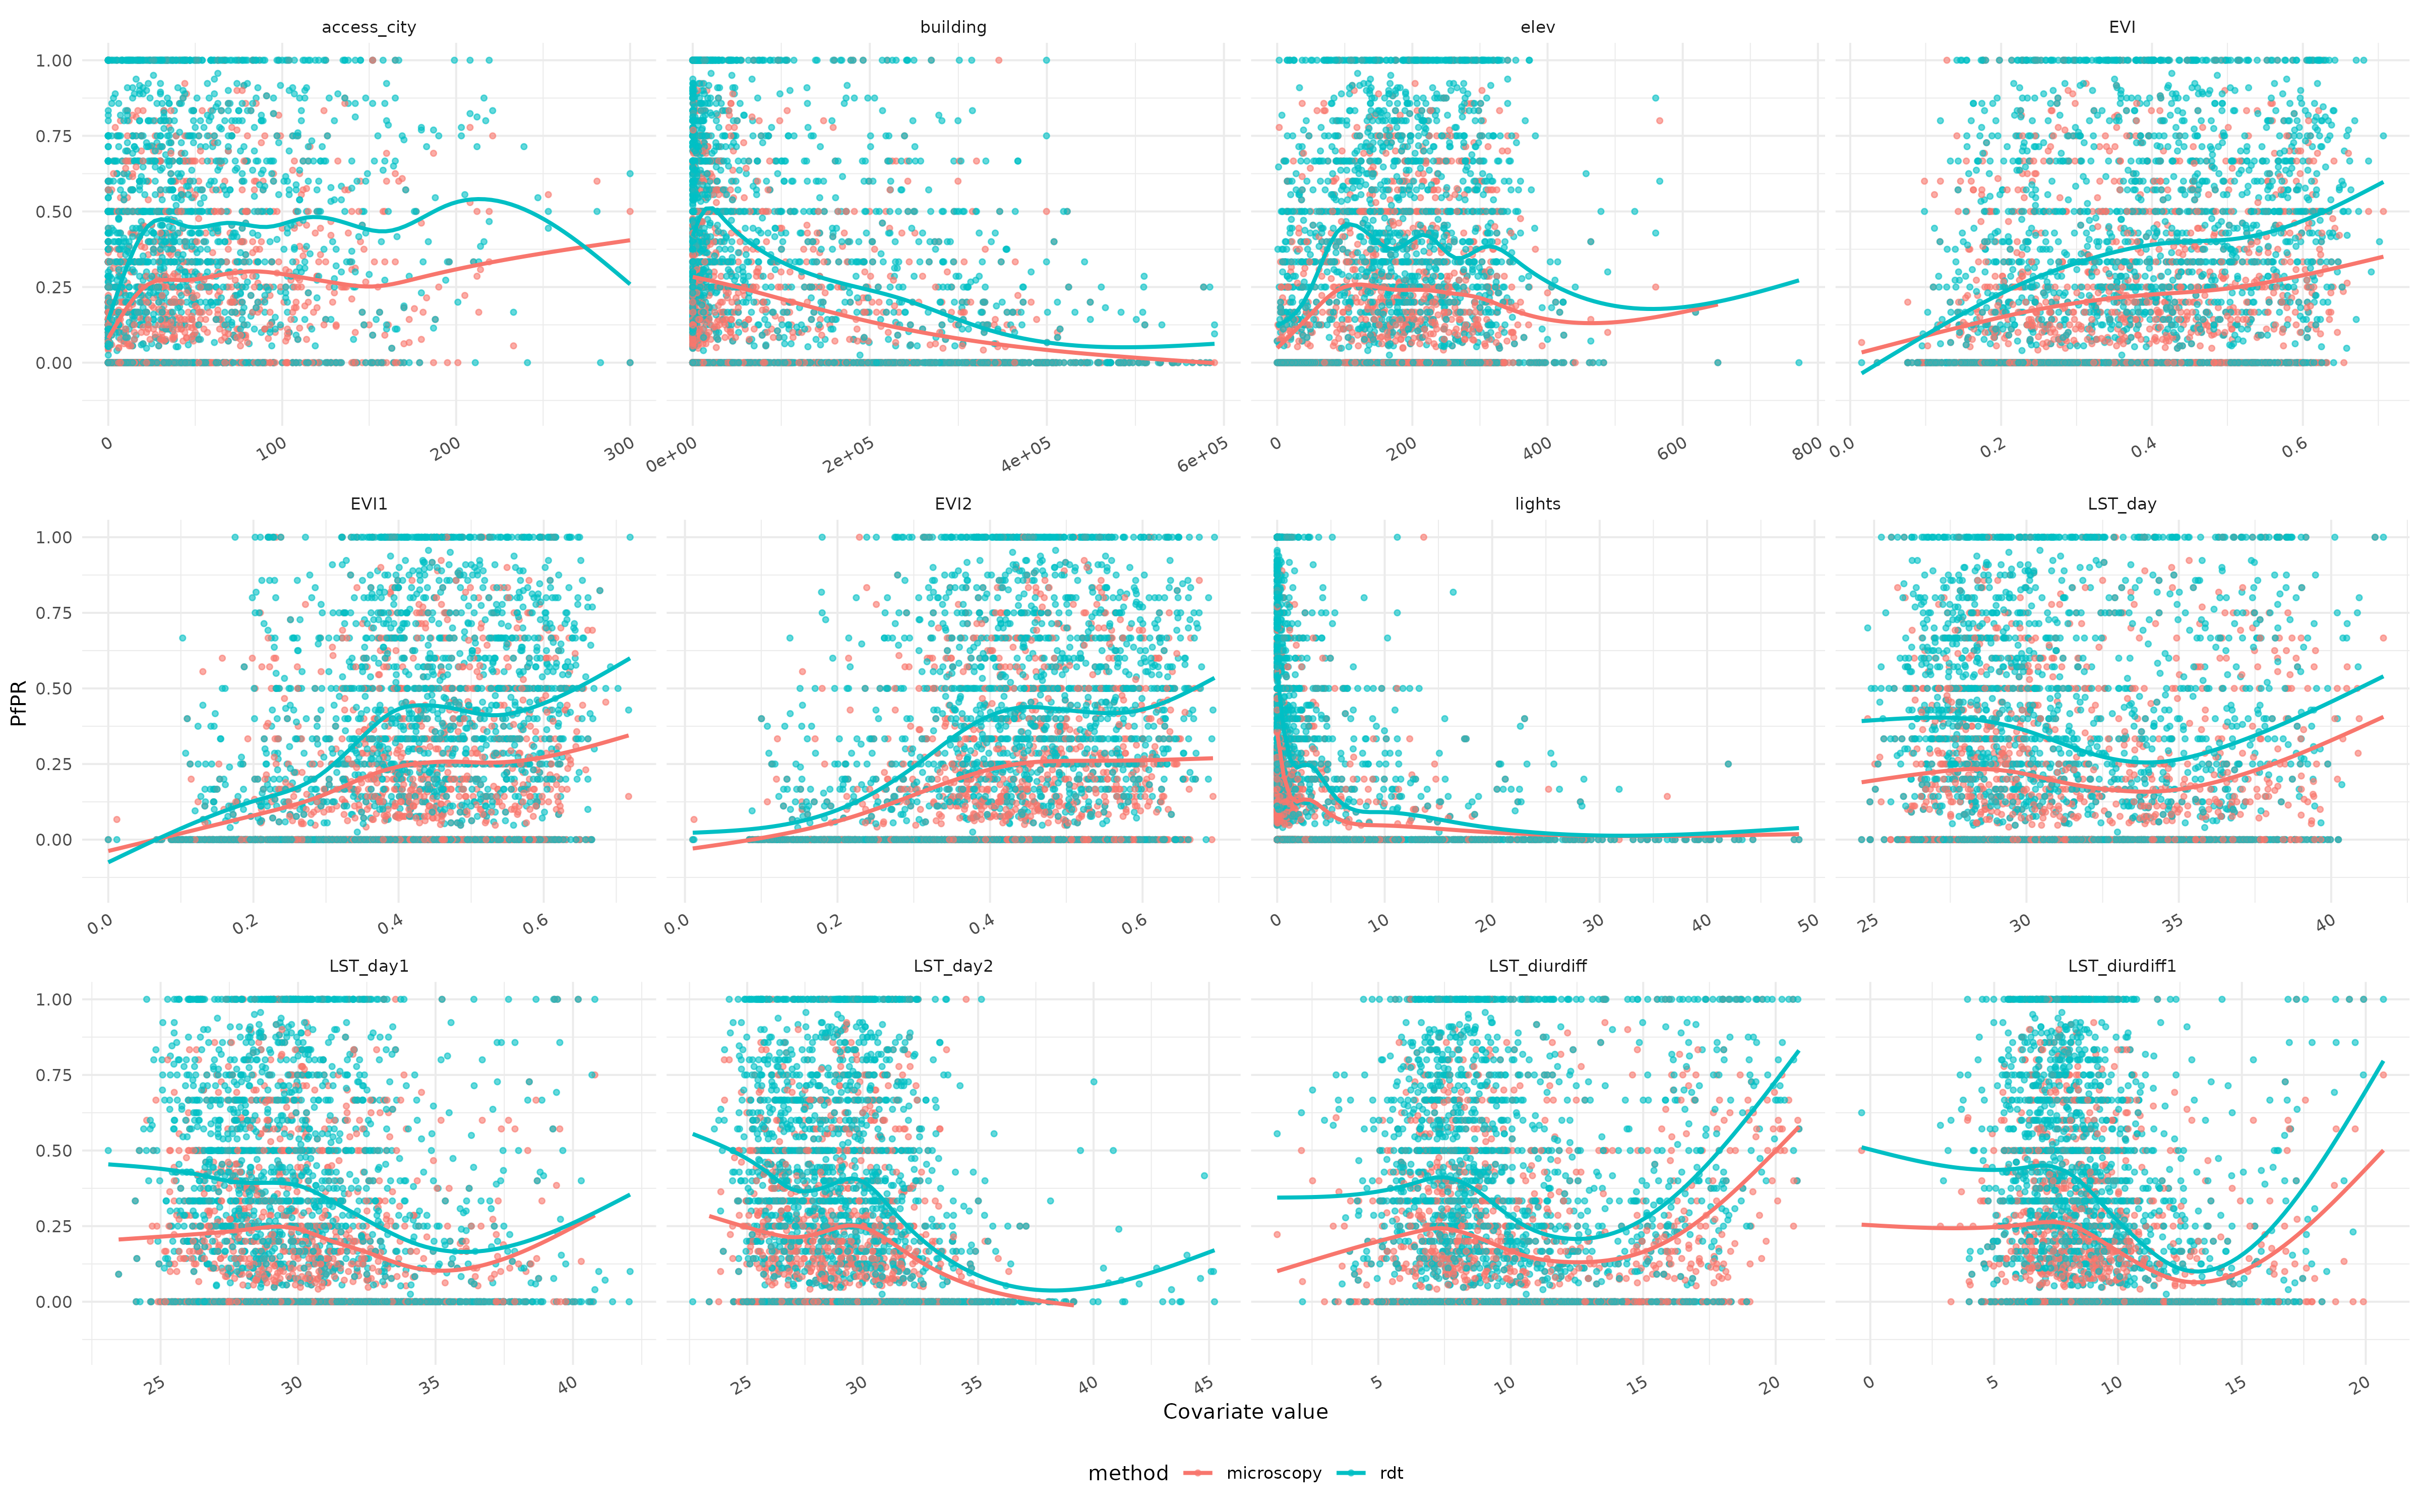  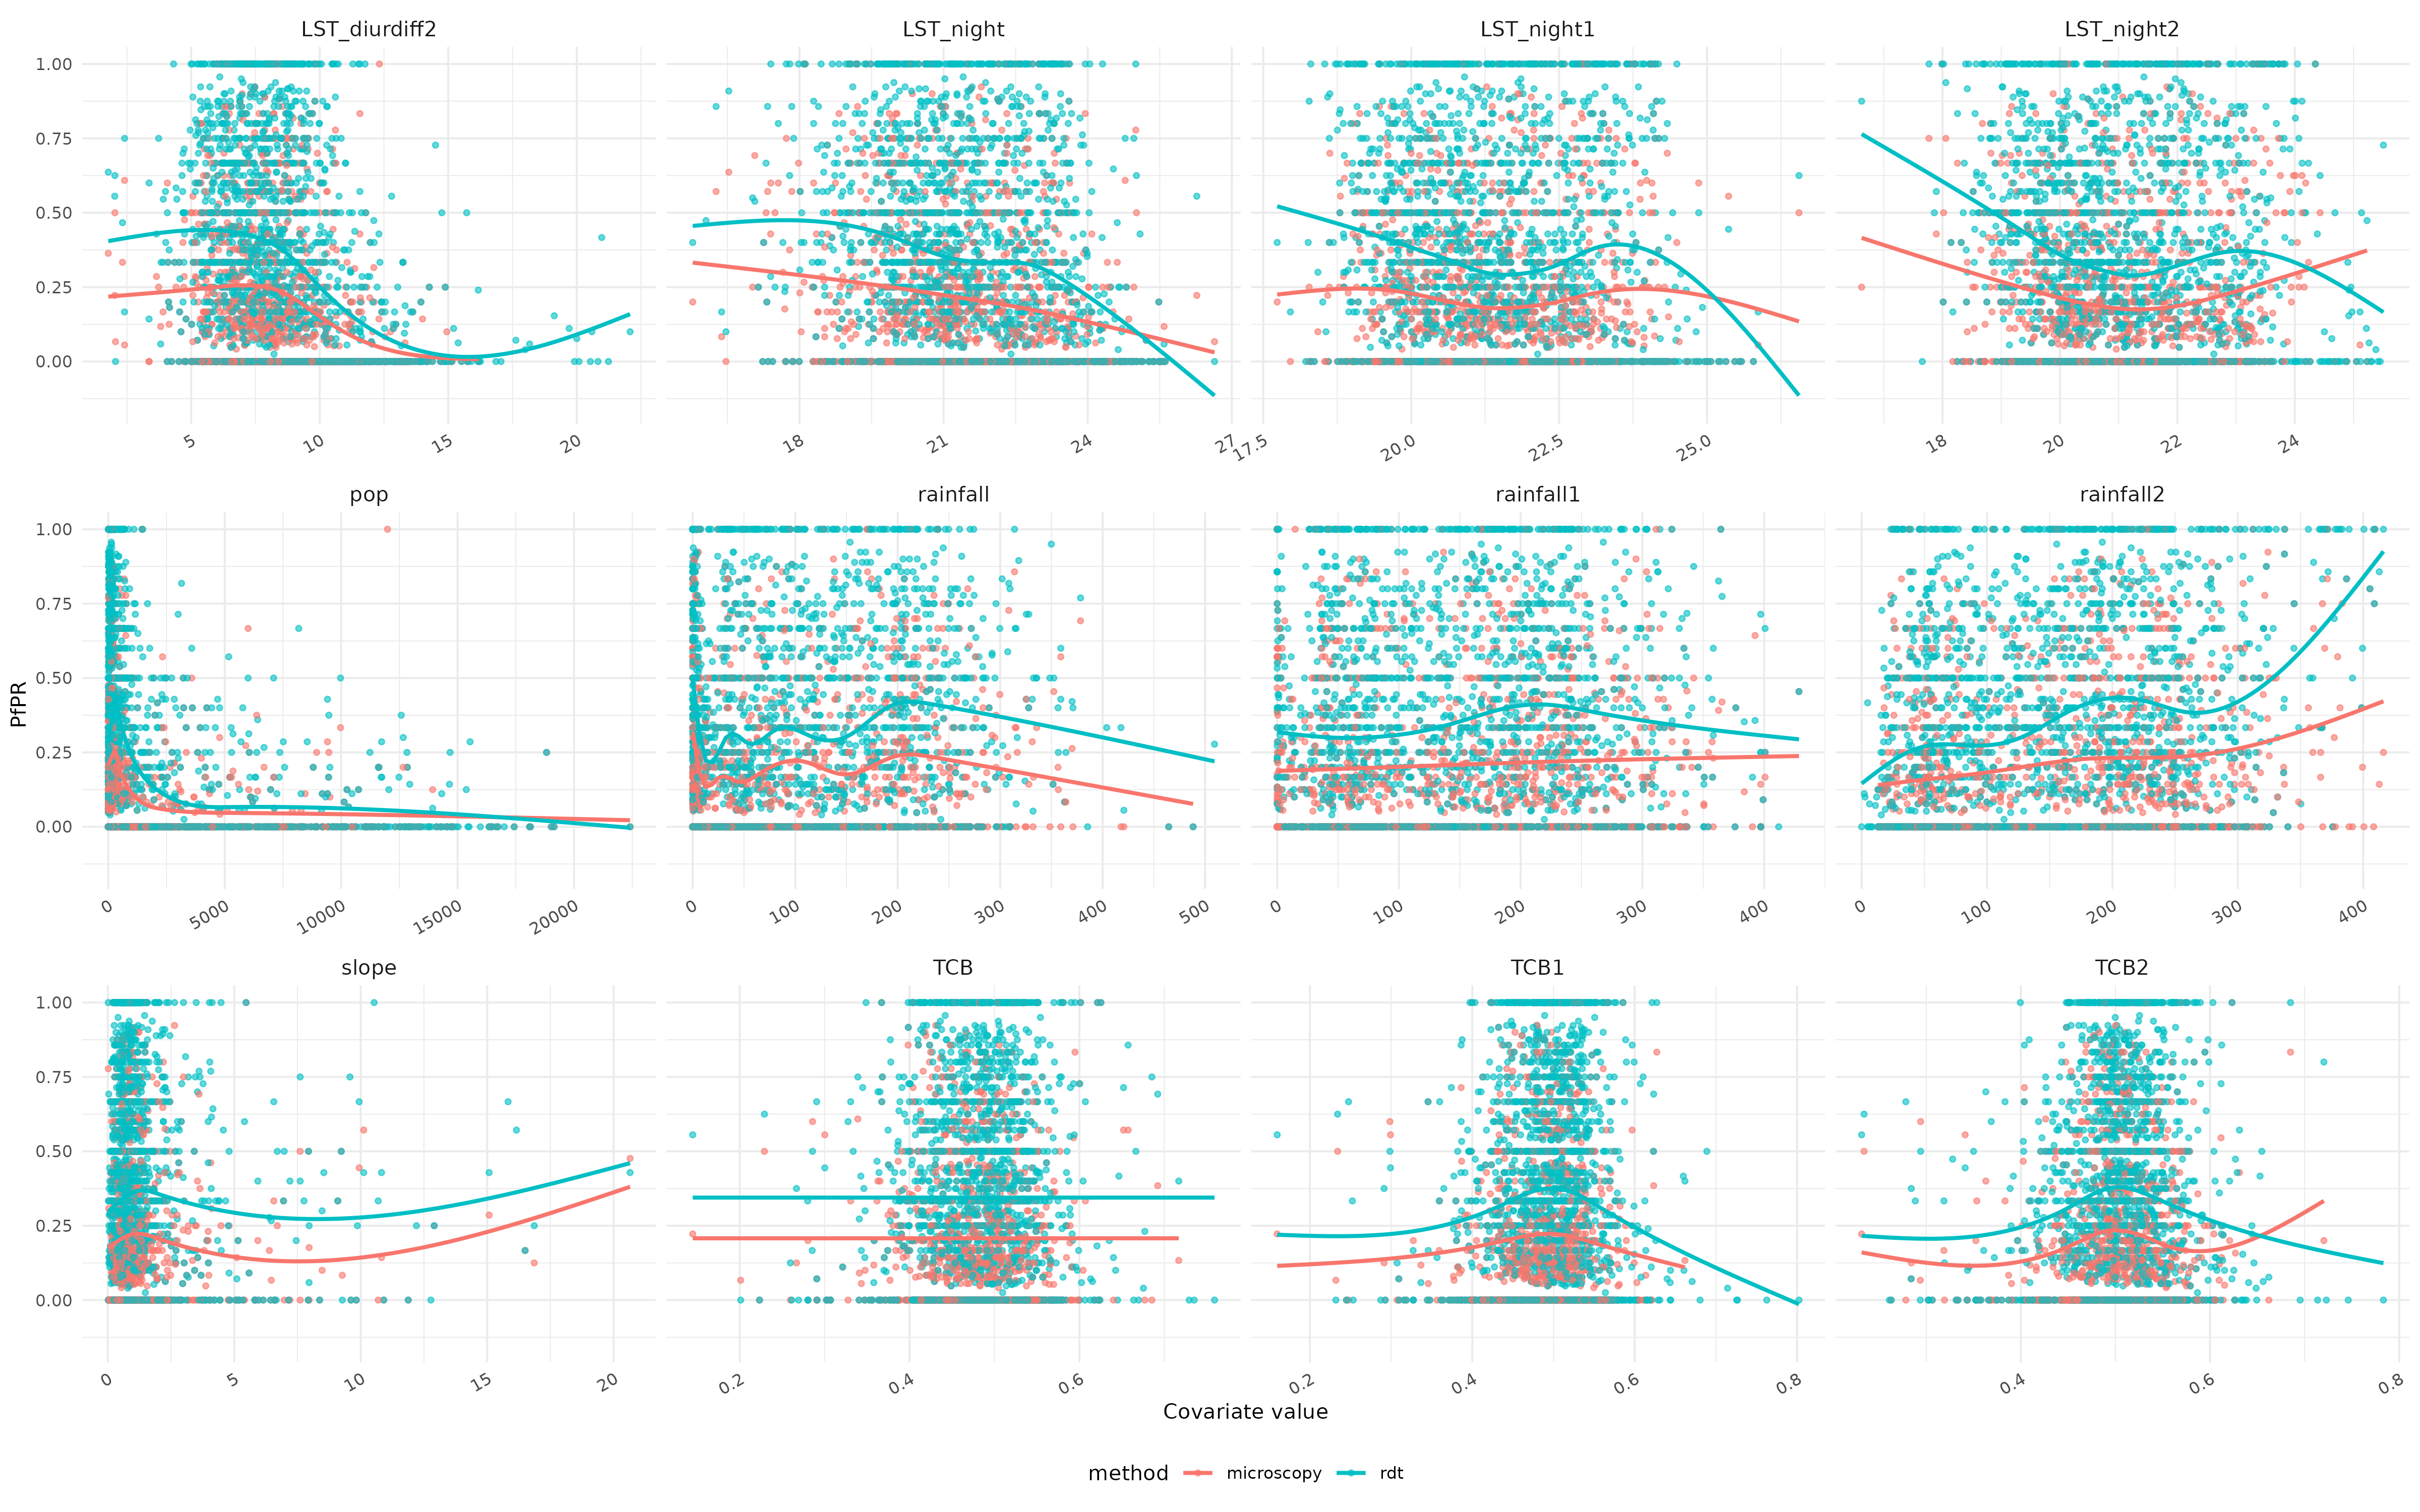  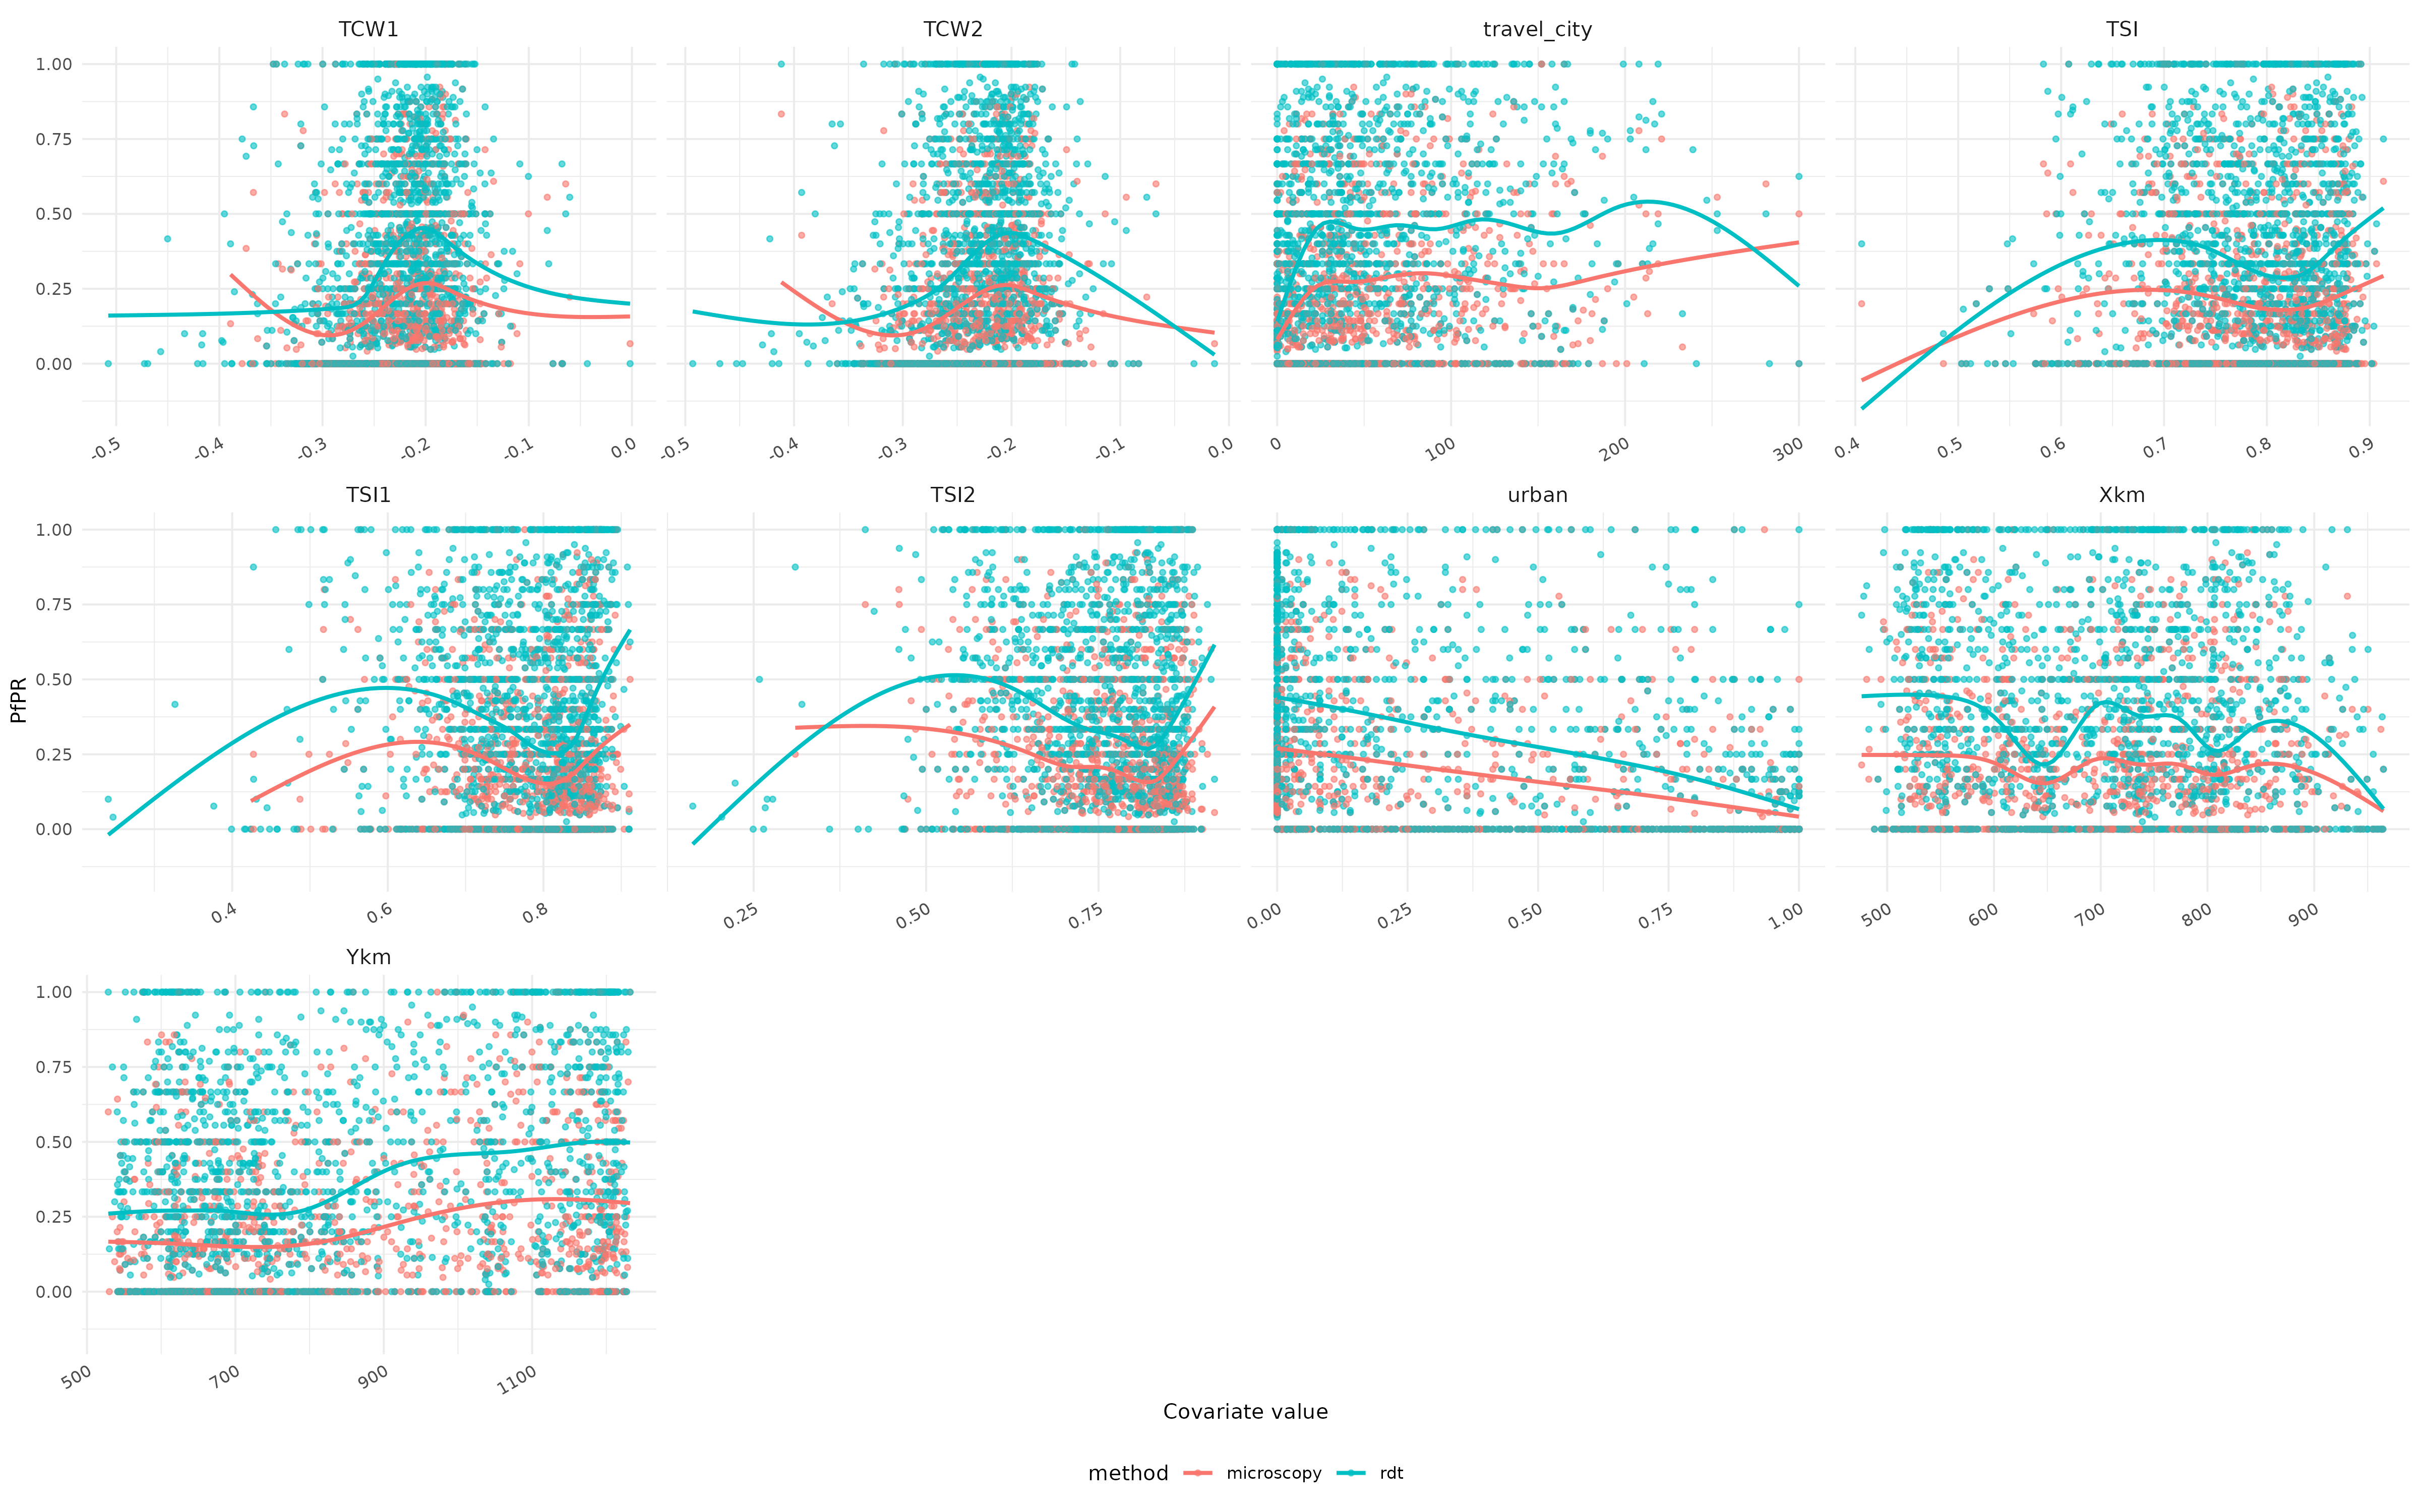  Supplementary Figure 2: Plot of relationship between outcome variable and covariates by diagnostic methods |
| --- |

## Relationship between covariates

We then assess for multicollinearity between each pair of covariates via VIF. This allowed us to exclude variables which are highly colinear with each other. We maintained variables with VIF values of <5 (Supplementary table 2).

Supplementary table 3: Covariates maintained after assessment of multicollinearity using Variance Inflation Factor (VIF)

| Covariate | Variance inflation factor |
| --- | --- |
| elev | 1.469733 |
| slope | 1.134708 |
| TSI | 2.721338 |
| TSI1 | 3.51626 |
| TSI2 | 3.884517 |
| rainfall | 2.410272 |
| rainfall1 | 2.014172 |
| rainfall2 | 2.075695 |
| TCB | 3.127385 |
| TCB2 | 2.848071 |
| LST_day | 4.583659 |
| LST_night | 3.190086 |
| LST_night2 | 3.129059 |
| LST_diurdiff1 | 4.230487 |
| LST_diurdiff2 | 3.51475 |
| pop | 2.991745 |
| lights | 3.607773 |
| travel_city | 1.462925 |
| urban | 2.809566 |

We also assessed correlation between each pair of covariates to select between 2 candidate variables. Pairs of variables are correlated if the correlation coefficient is 0.7 or more (Supplementary figure 3).


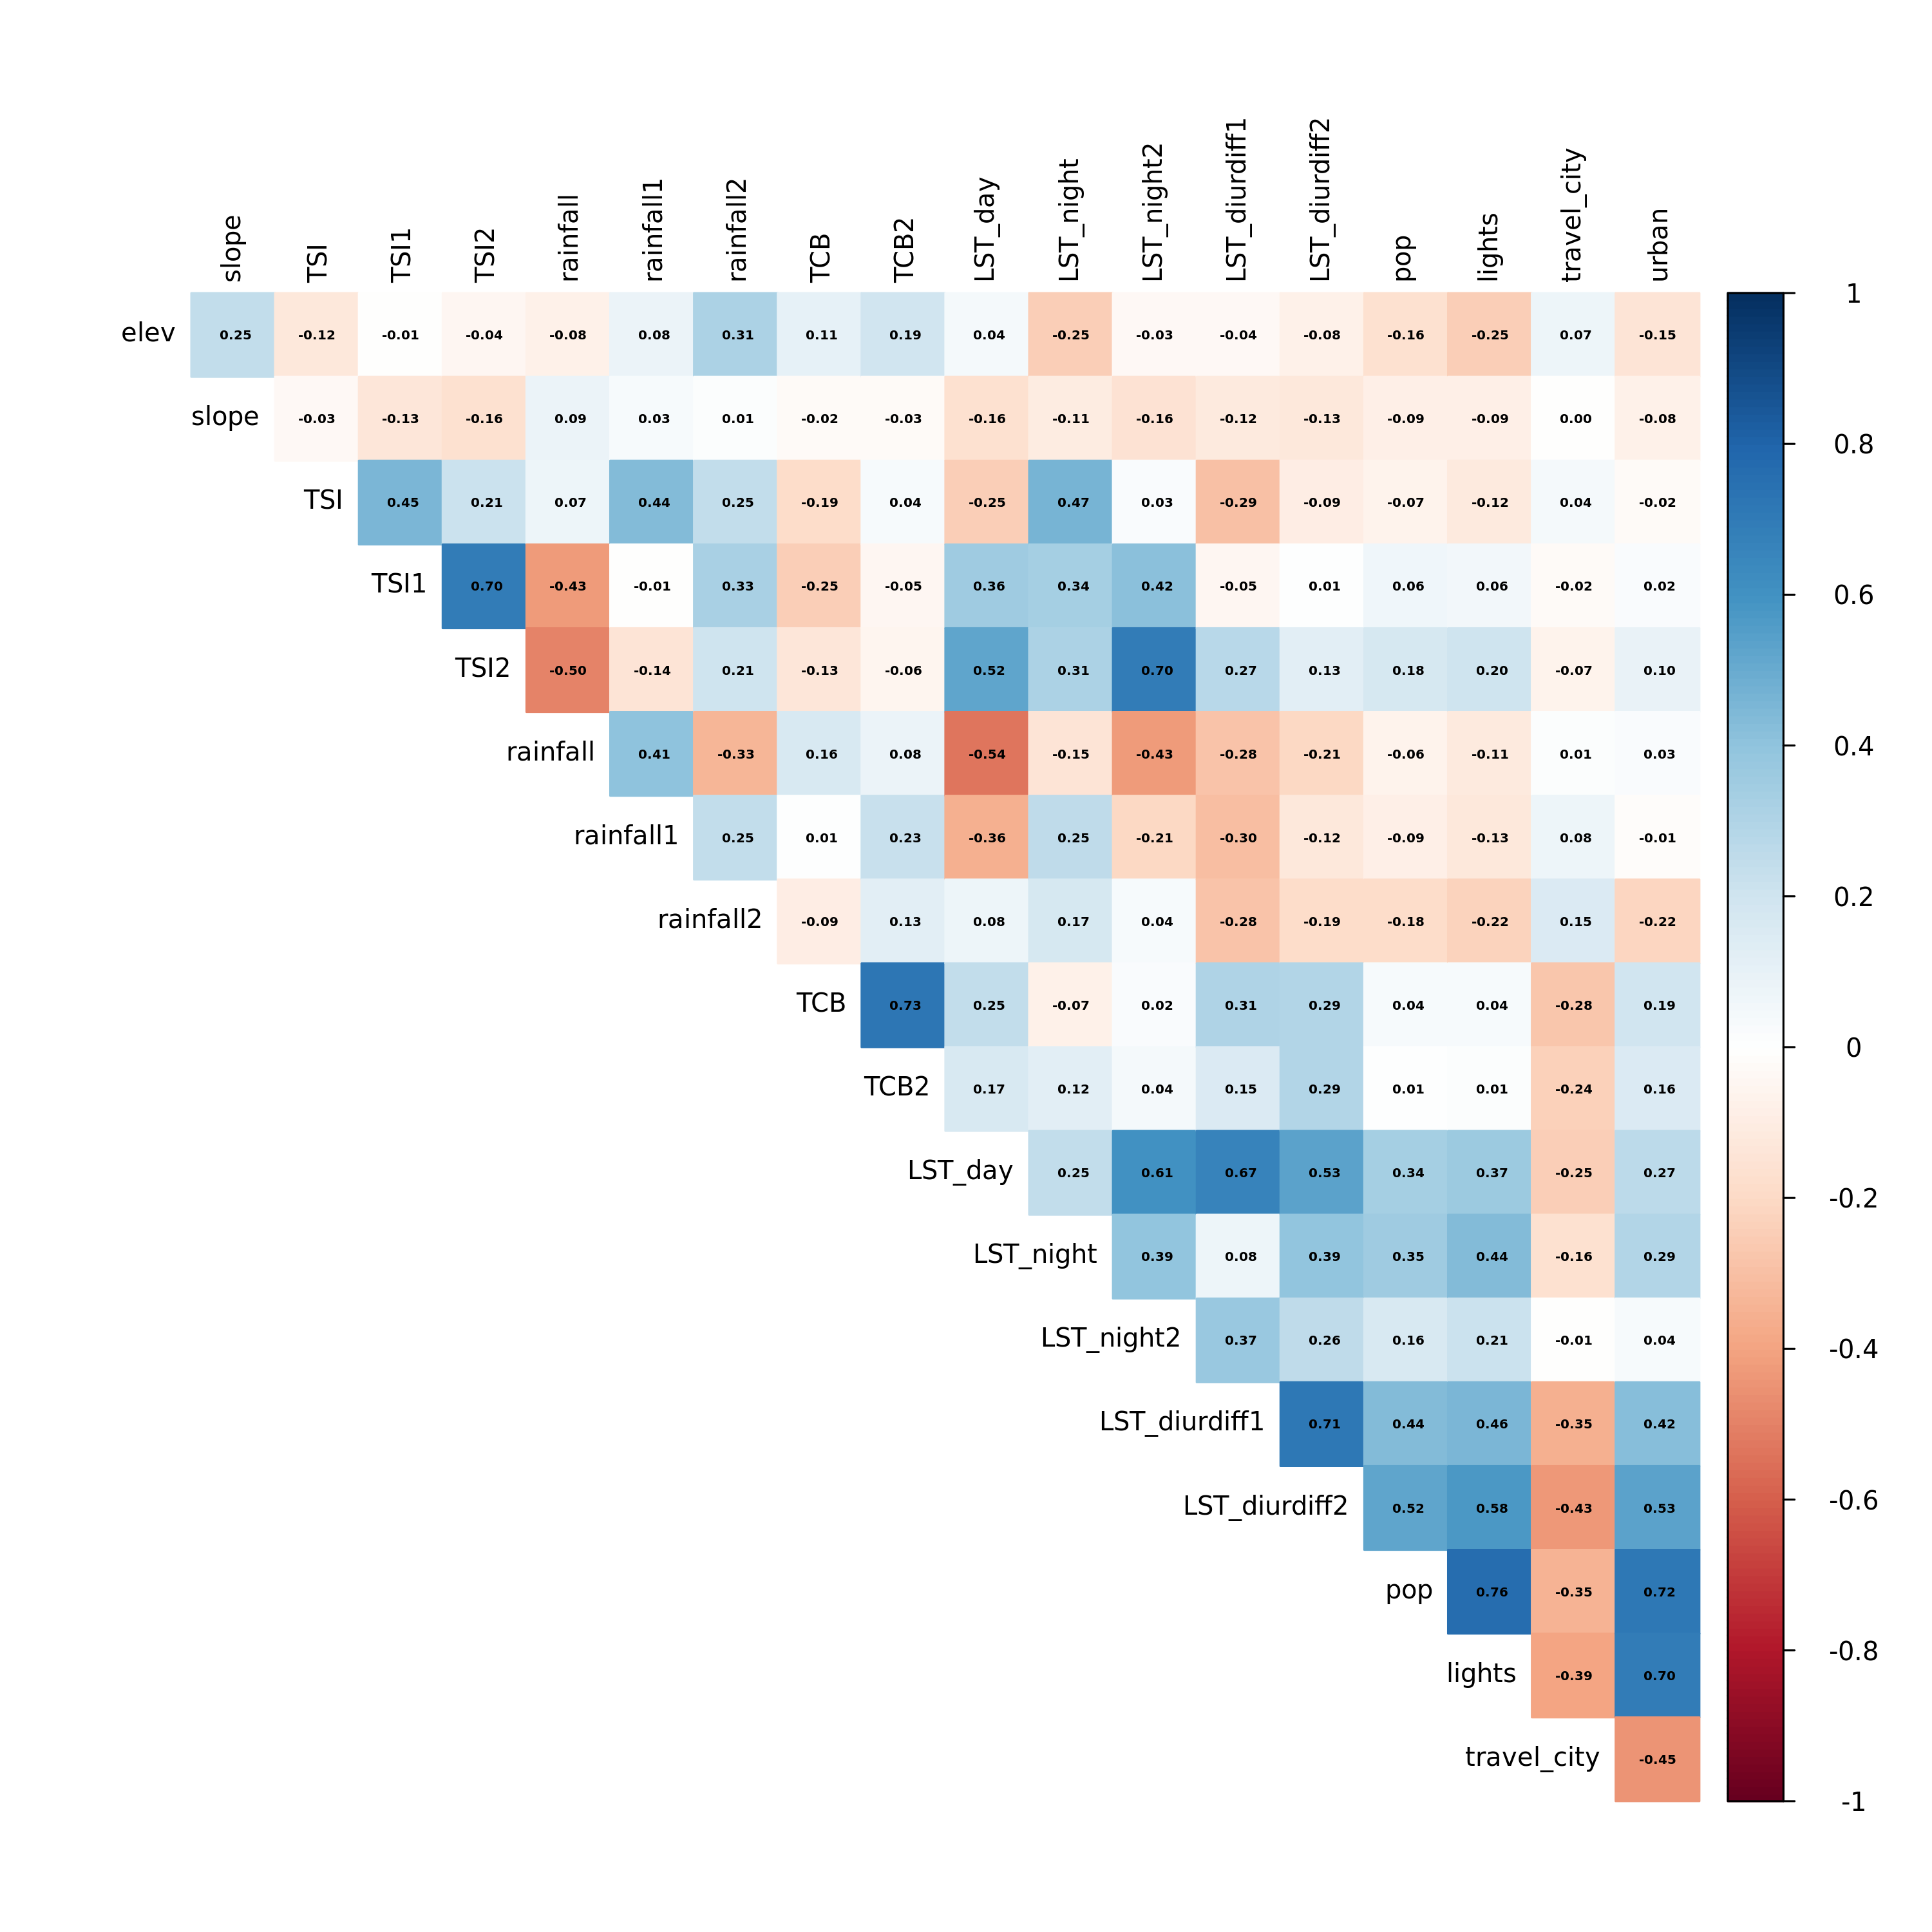


Supplementary Figure 3: Correlation matrix of relationship between each pair of covariates

## Model selection

We first fitted four non-spatial models with covariates to determine which temporal structure best fit the data. Using the WAIC value, a model with year as first-order autoregressive effect was found to best fit the data (Supplementary Table 4).

Supplementary Table 4: Results of non-spatial model to select the best temporal structure

| Model | WAIC |
| --- | --- |
| Model with only month | 16757 |
| model with month and year as iid | 13468 |
| Model with month and year as random walk order 1 (rw1) | 13468 |
| Model with month and year as first-order autoregressive (ar1) | 13467 |

Recognizing that the same location may have measurements for both diagnostic methods, we investigated a number of candidate models that capture dependency. These models included using method as random effect to account for the differences in diagnostic methods, method-specific intercept with shared covariates and spatial field, method-specific spatial field and temporal term etc. In total, 11 candidate models were explored to justify each term that will be included in the final model. Supplementary table 5 provides details of components for each model.

Supplementary Table 5: Candidate models considered and their unique components

| No | Component | Models | | | | | | | | | | |
| --- | --- | --- | --- | --- | --- | --- | --- | --- | --- | --- | --- | --- |
|  | B1 | B2 | B3 | B4 | B5 | B6 | B7 | B8 | B9 | B10 | B11 |
| 1 | Overall intercept | √ | √ | √ | √ | √ | √ |  |  |  |  |  |
| 2 | Method specific intercept |  |  |  |  |  |  | √ | √ | √ | √ | √ |
| 3 | Covariates |  | √ | √ | √ | √ | √ | √ | √ | √ | √ | √ |
| 4 | Static spatial field | √ | √ | √ | √ |  |  |  |  |  |  |  |
| 5 | Autoregressive  spatial field - shared |  |  |  |  | √ | √ |  |  | √ |  |  |
| 6 | Autoregressive spatial field – method specific |  |  |  |  |  |  | √ |  |  | √ |  |
| 7 | Autoregressive spatial field with method-specific priors |  |  |  |  |  |  |  | √ |  |  | √ |
| 8 | Month term |  |  |  | √ |  | √ |  |  |  |  |  |
| 9 | Shared temporal process |  |  | √ | √ | √ | √ |  |  |  | √ | √ |
| 10 | Method specific temporal process |  |  |  |  |  |  | √ | √ | √ |  |  |

## Model structure

The number of positives at each georeferenced cluster was assumed to be a binomial random variable: ; where is the number of malaria-positive children, is the total number examined (tested), and is the predicted malaria prevalence at location .

A logistic regression model that linked the predicted prevalence to the covariates, a spatial random effect and temporal trend is expressed as:

Where, is the intercept, are the coefficients of covariates , is a spatially structured random effect and is a temporal term modelled using a Gaussian Markov Random Field (GMRF) with a Matérn covariance function. The spatial random effect captures residual spatial variation not explained by the covariates. The Matérn covariance function is defined by two hyperparameters: range (ρ), the distance beyond which spatial correlation becomes negligible, and standard deviation (σ), the marginal variance of the spatial process. Within a spatio-temporal framework the equation was modified as

where represent space, represents time and is the linear predictor.

# Results

## Covariate effects

Six out of 10 covariates were found to be associated with malaria prevalence for both diagnostic methods


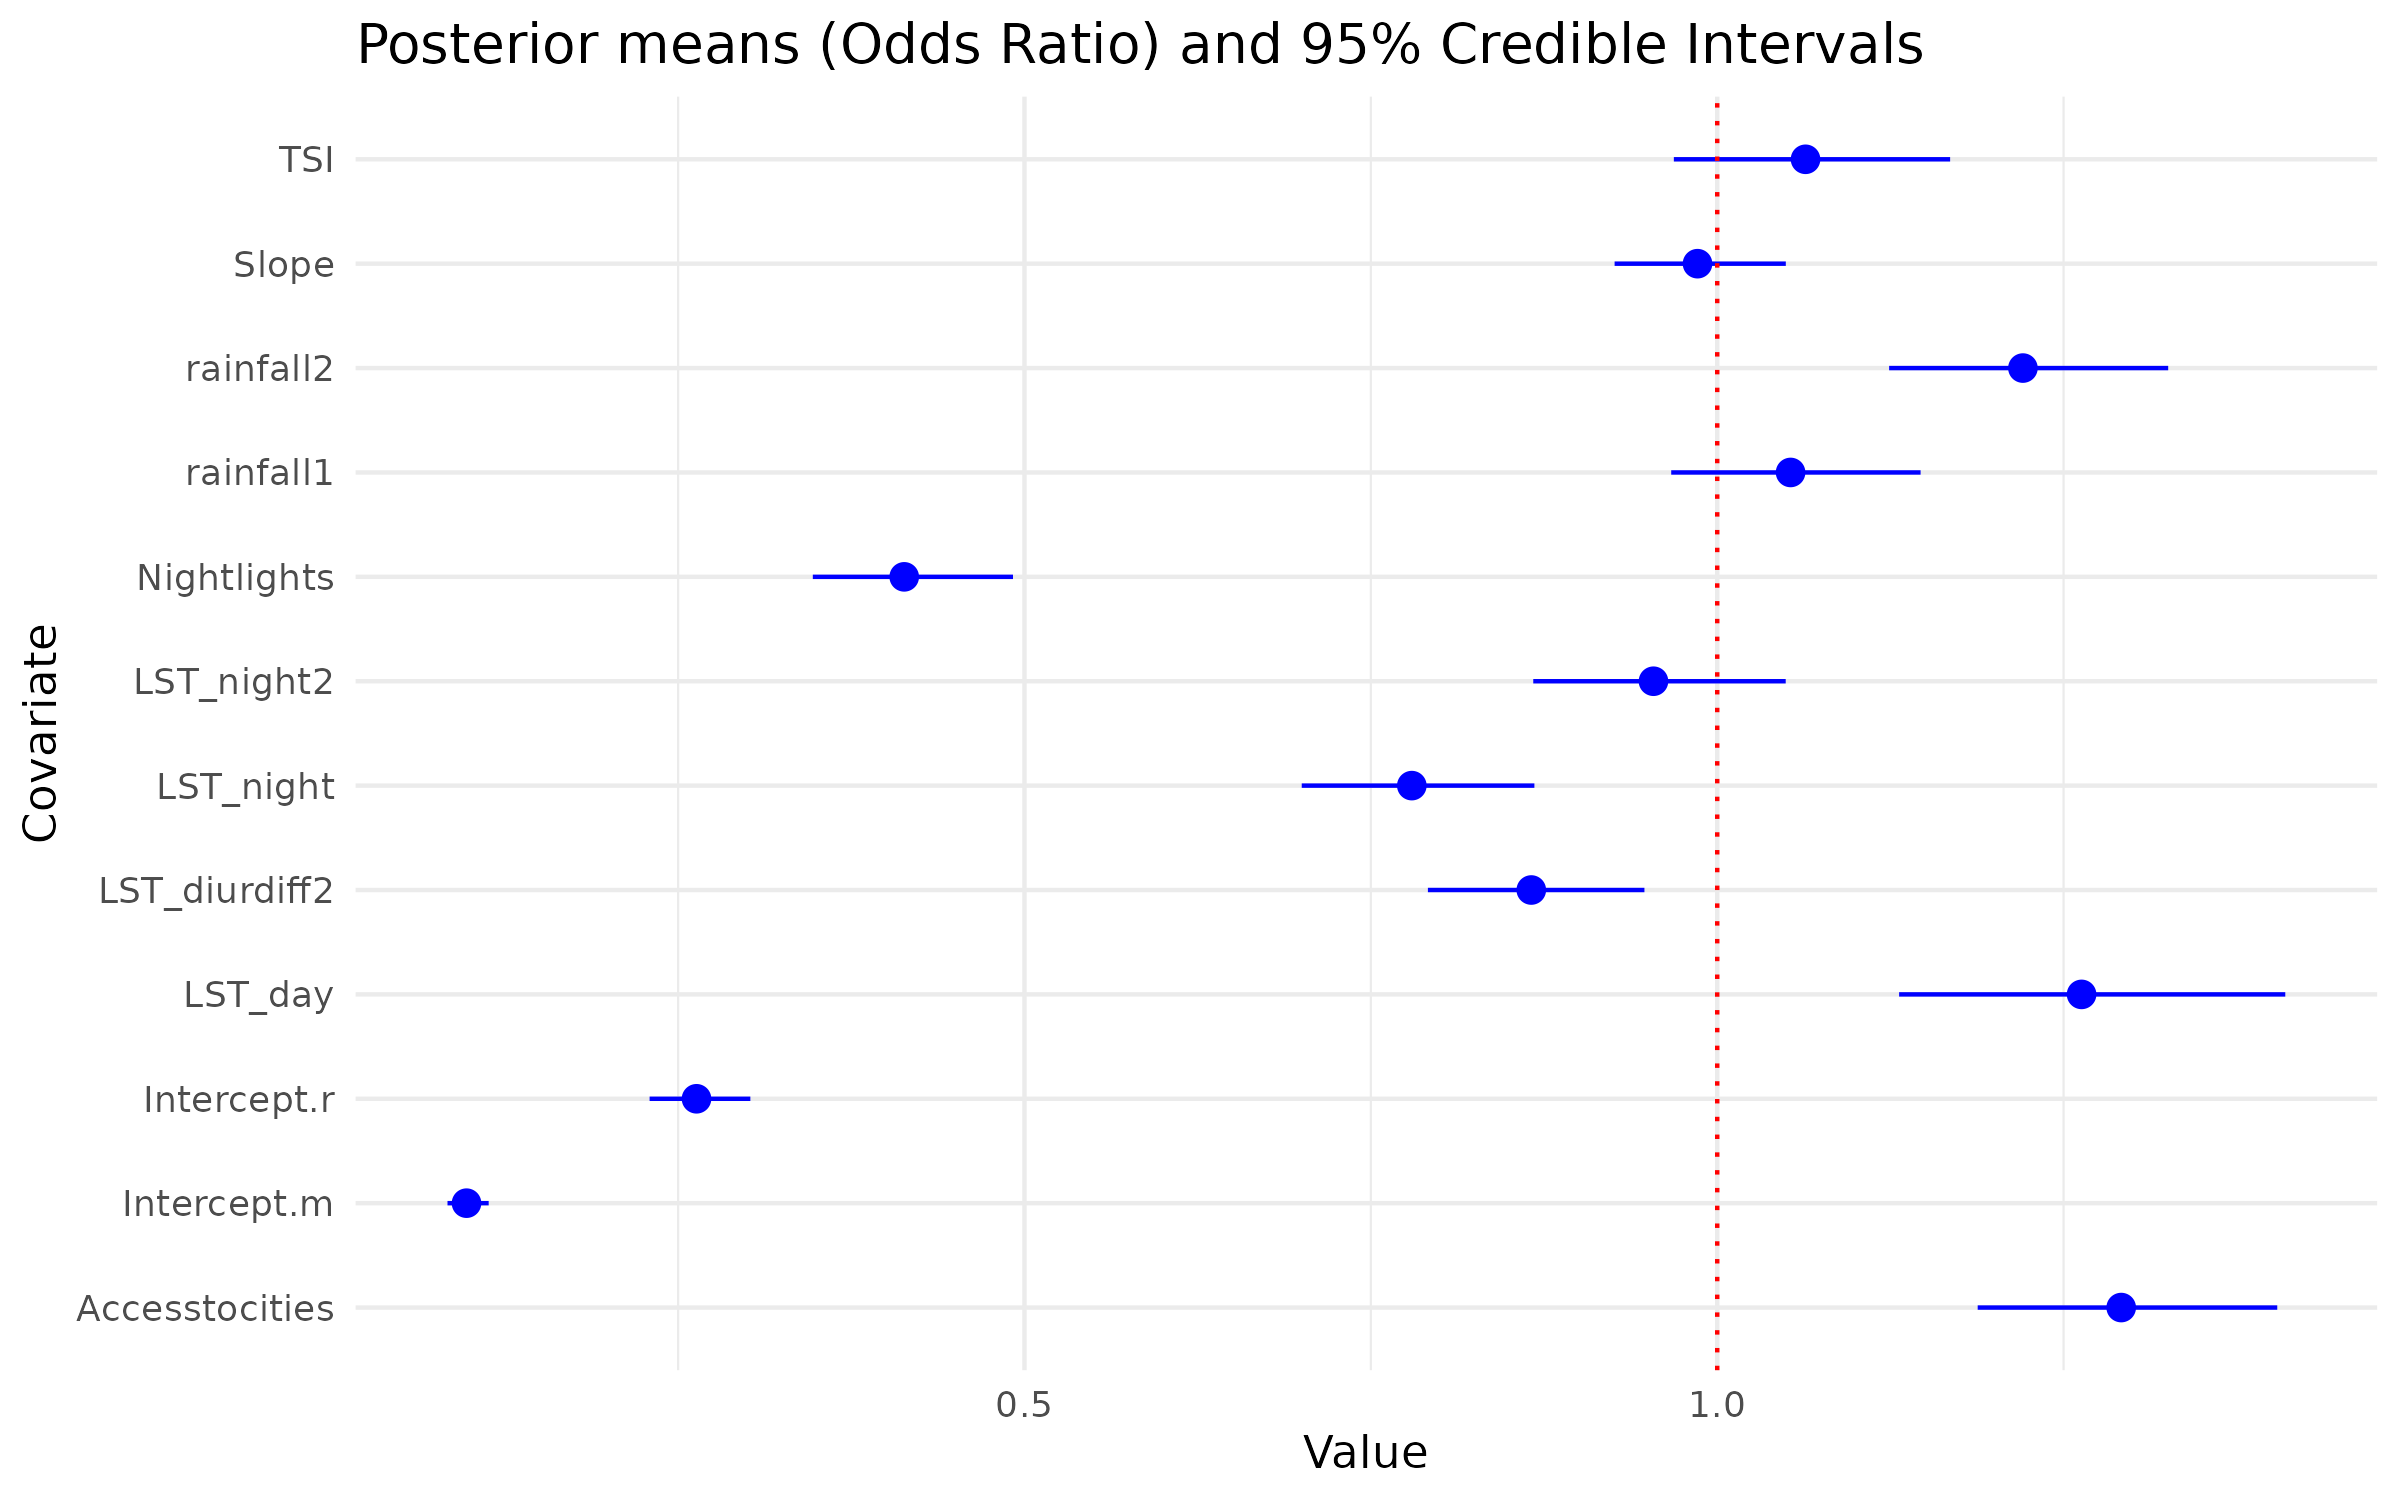


Figure 4: Posterior means (Odds ratio) of model covariates and corresponding 95% credible intervals. Red vertical line indicates reference value for considering a covariate important. Covariates with credible interval bands touching/crossing the red line are considered not important to malaria prevalence in the model.

## Model selection

Out of the 11 candidate models considered, model 9 was preferred due to its lower DIC/WAIC values (Table 2). This model included method-specific intercept, shared covariates, shared autoregressive spatial-temporal field, and method-specific temporal terms, producing the optimal balance between model complexity and overfitting.

Supplementary Table 6: Results of model selection process showing DIC and WAICs of candidate models considered

|  | **Models** | **DIC** | **WAIC** |
| --- | --- | --- | --- |
| **1** | B1 | 12042.1 | 12864.5 |
| **2** | B2 | 10861.2 | 11356.8 |
| **3** | B3 | 10288.4 | 10672.1 |
| **4** | B4 | 10288.8 | 10672.7 |
| **5** | B5 | 9920.7 | 9905.0 |
| **6** | B6 | 9921.3 | 9905.6 |
| **7** | B7 | 10628.4 | 10744.6 |
| **8** | B8 | 10634.6 | 10759.4 |
| **9** | B9 | 9852.1 | 9815.4 |
| **10** | B10 | 10637.3 | 10759.1 |
| **11** | B11 | 10642.5 | 10772.2 |

*Key: DIC - Deviance Information Criterion; WAIC – Watanabe-Akaike Information Criterion*

## Spatial and temporal random effects

The risk of malaria was higher in 2011 for both diagnostic methods than the rest of the years (Supplementary table 6). The odds of malaria prevalence (risk) was 2.89 times in 2011 for microscopy and 3.95 times for RDT in the same year. There was reduced risk for all methods in 2022 and 2023.

Supplementary Table 7: Relative malaria risk for each year by diagnostic method

| **Year** | **Microscopy** | **RDT** |
| --- | --- | --- |
| 2011 | 2.89 (2.42–3.46) | 3.95 (3.33–4.70) |
| 2014 | NA | 1.98 (1.66–2.36) |
| 2016 | 1.54 (1.24–1.90) | 1.09 (0.89–1.33) |
| 2017 | NA | 0.99 (0.73–1.36) |
| 2019 | 1.03 (0.83–1.27) | 0.84 (0.69–1.03) |
| 2022 | 0.46 (0.38–0.56) | 0.46 (0.39–0.55) |
| 2023 | 0.47 (0.32–0.69) | 0.30 (0.21–0.44) |

The partial effect of the year for the two methods is shown Supplementary Figure 5. Both methods show a declining trend from 2011 to 2023. However, there seems to be an increasing trend from 2022 for microscopy compared with RDT


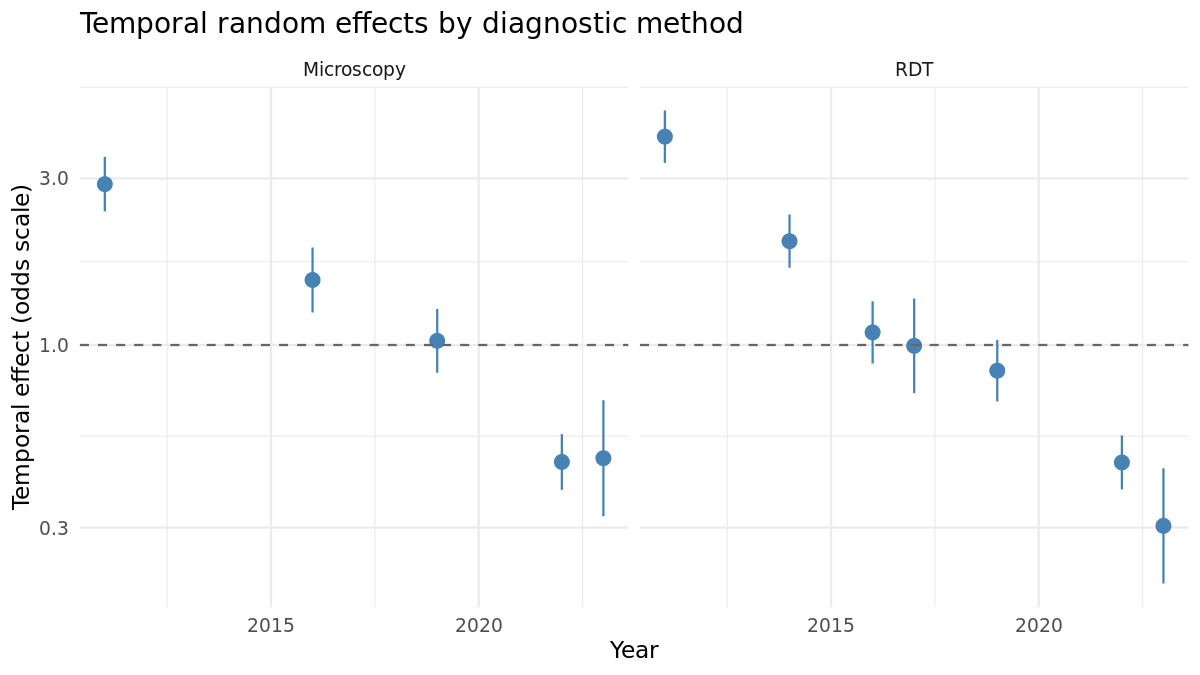


Supplementary Figure 5: Year-on-year effect of malaria prevalence by diagnostic method with 95% credible intervals (blue lines). Grey horizontal line indicate reference where no change was observed between years.

The spatial range within which malaria prevalence is correlated was found to be approximately 20km in Ghana (Supplementary Figure 6).


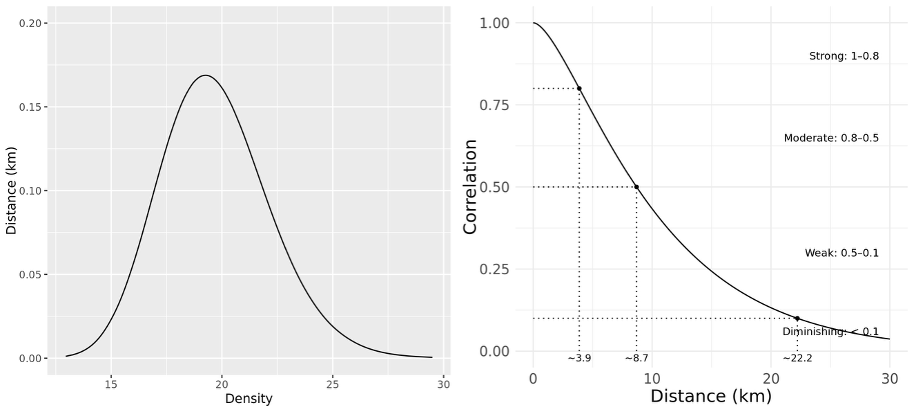


Supplementary Figure 6: Spatial range and Matern correlation densities

After accounting for covariate and temporal effect, we noticed an underlying risk pattern across the country (Supplementary figure 7). Between 2011 and 2016, the risk was higher in Northwest and Northeastern parts of the country and relatively lower in the southern part of the country. From 2017, this pattern had shifted with some parts of the middle and coastal areas of the country showing elevated risk compared to the northern part of the country.


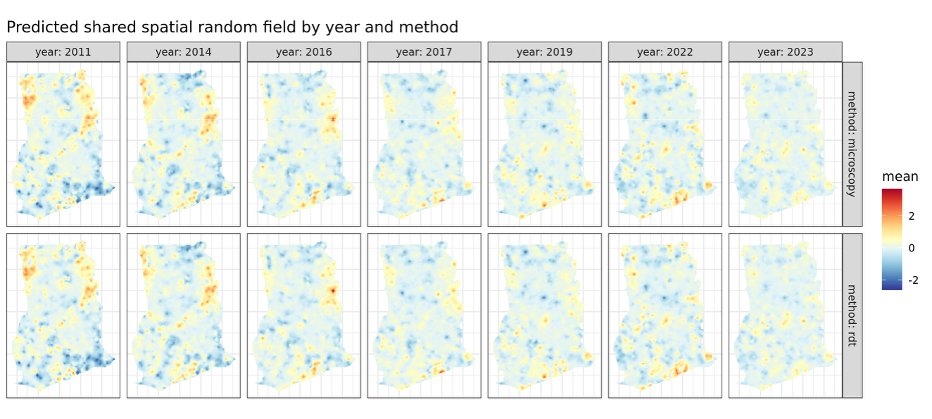


Supplementary Figure 7: Spatial patterns of underlying malaria risk by method for each year

We observed higher spatial variability in RDT-derived prevalence estimates compared with microscopy (Supplementary figure 8). The semi-variogram plot revealed positive spatial autocorrelation for both methods which plateaued at ~50-60 km. This suggests that spatial patterns for malaria prevalence in Ghana are not correlated beyond this distance.

A semi-variogram plot that shows spatial decay for both diagnostic methods is shown in Supplementary Figure 8. Both diagnostic methods assume independence at 50 km with microscopy decaying faster than RDT.


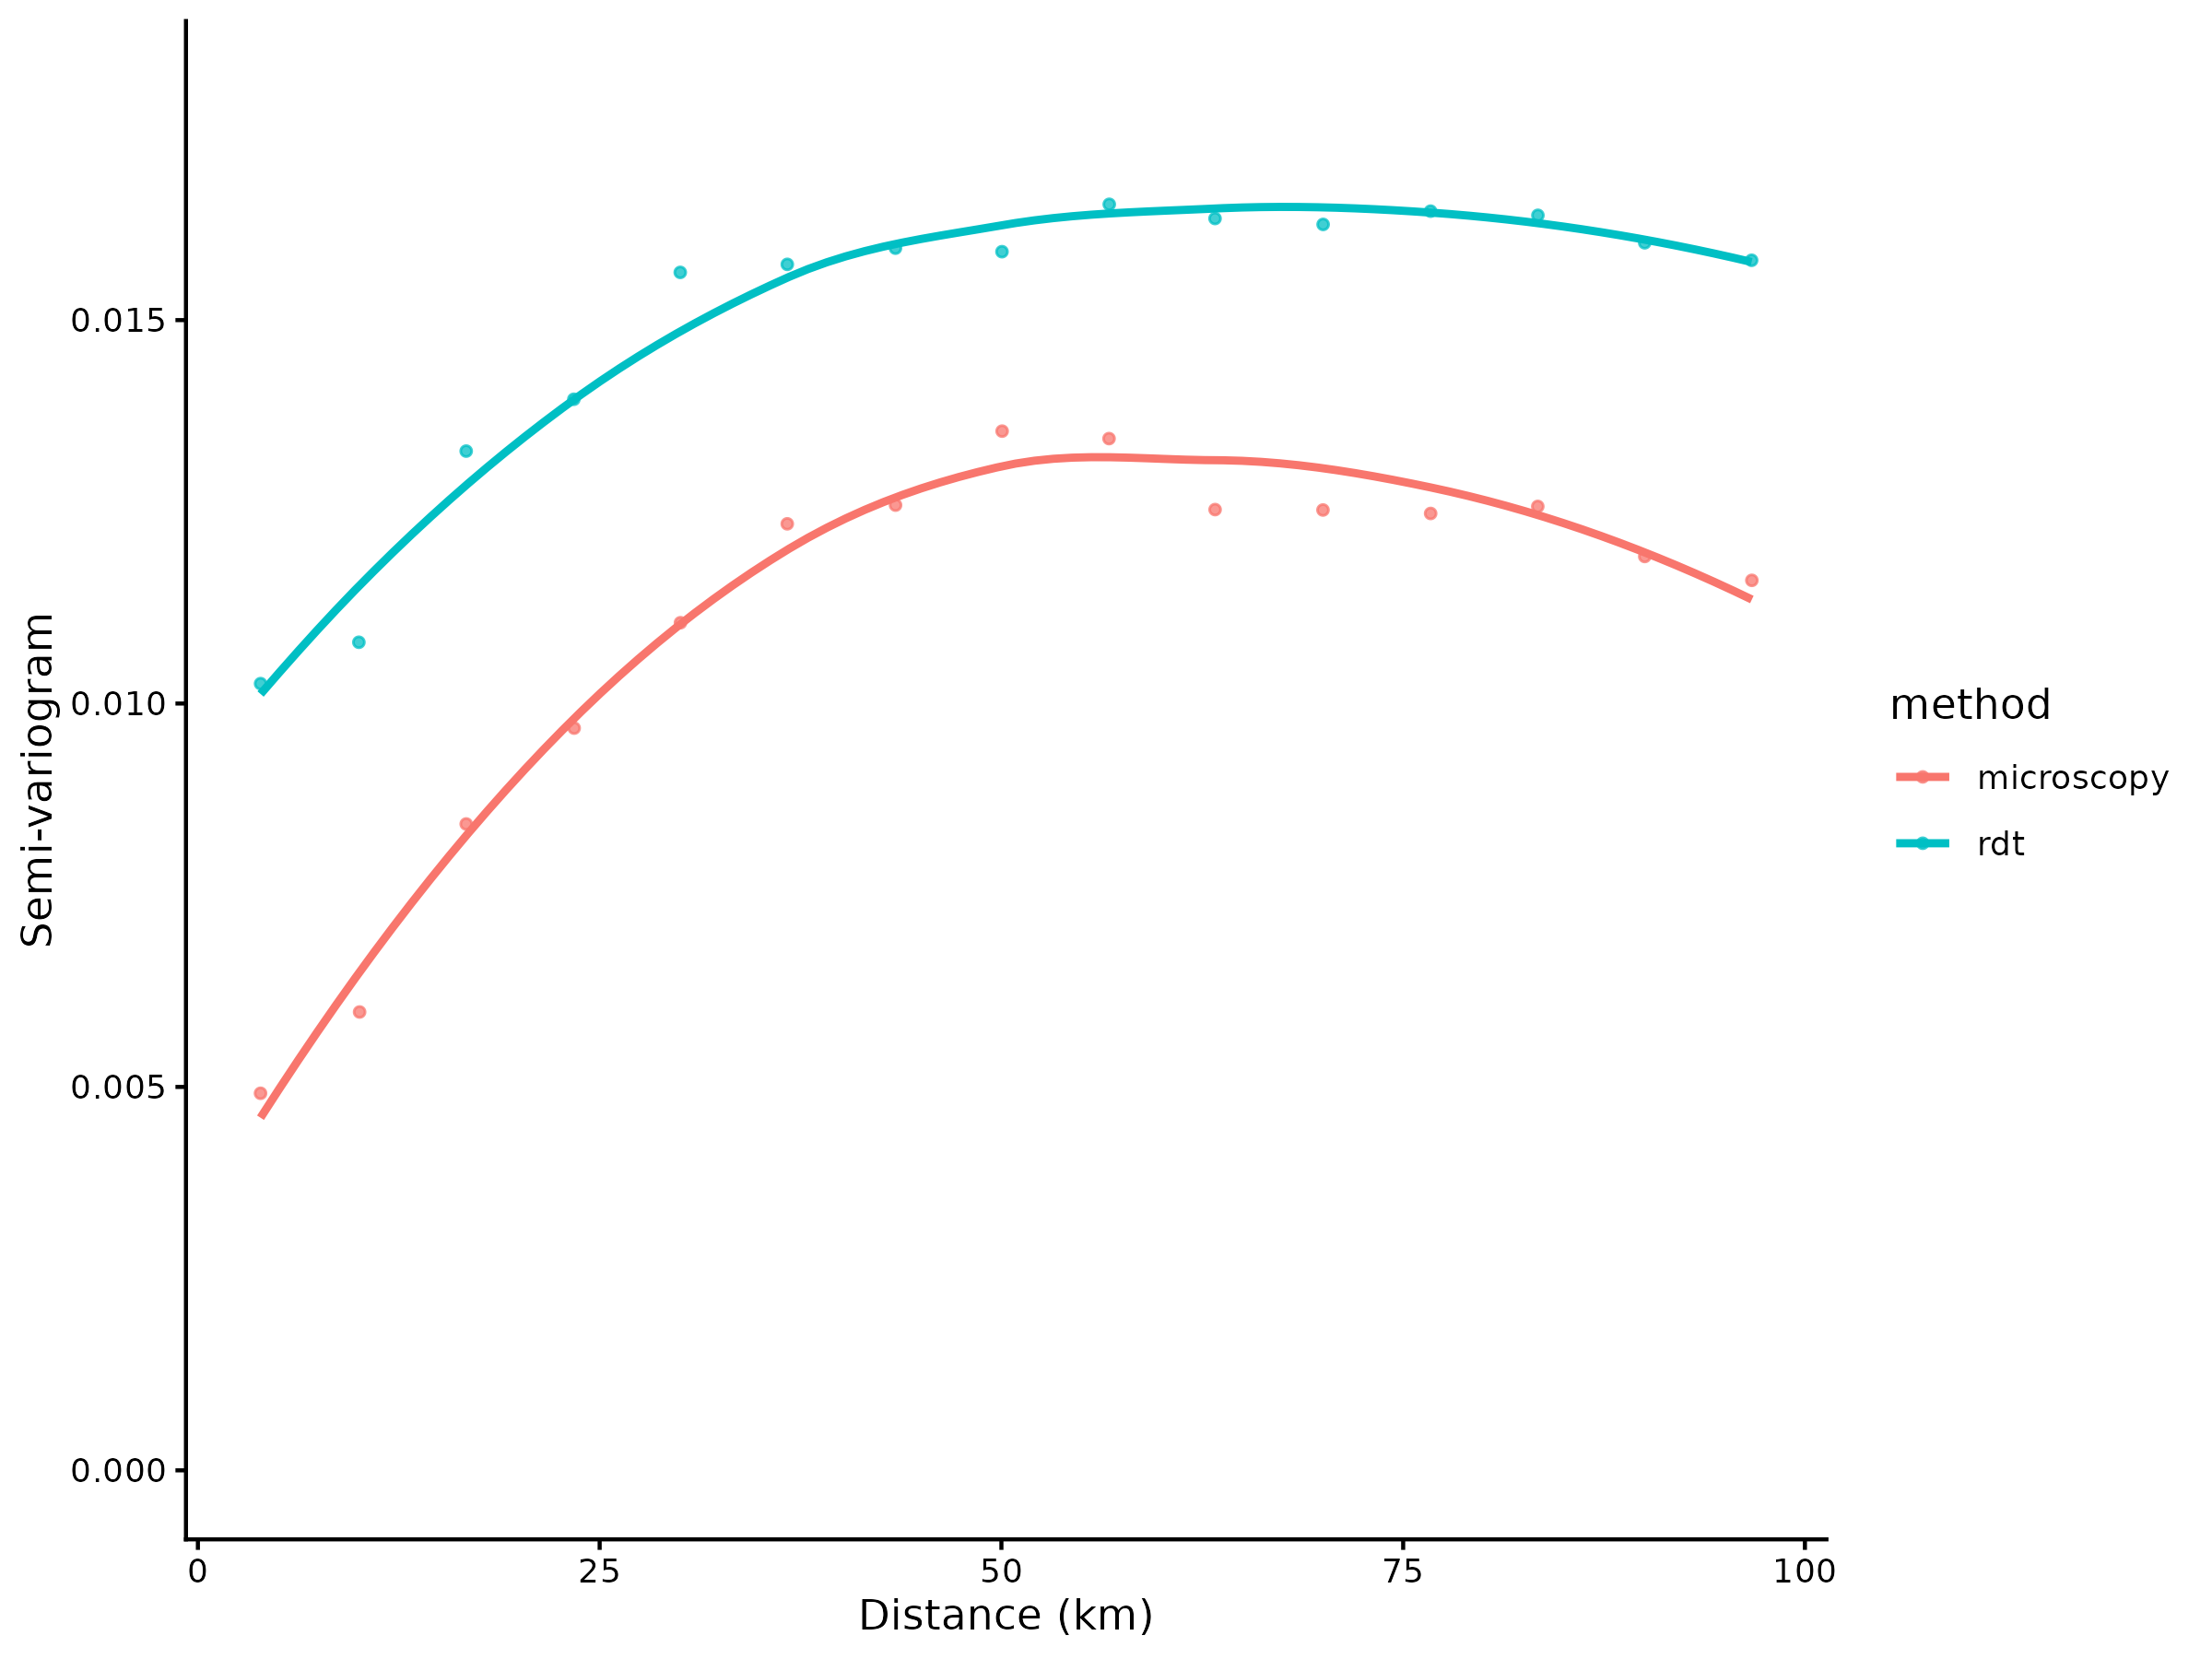


Supplementary Figure 8: Empirical semi-variogram and fitted model for microscopy and RDT prevalence showing distance where spatial locations become independent

## Model validation

### In sample model validation

Comparing the observed mean prevalence for the survey months to the predicted prevalence for the same months, we noted a perfect fit with an correlation coefficient (R) value of 1 (Supplementary figure 9)


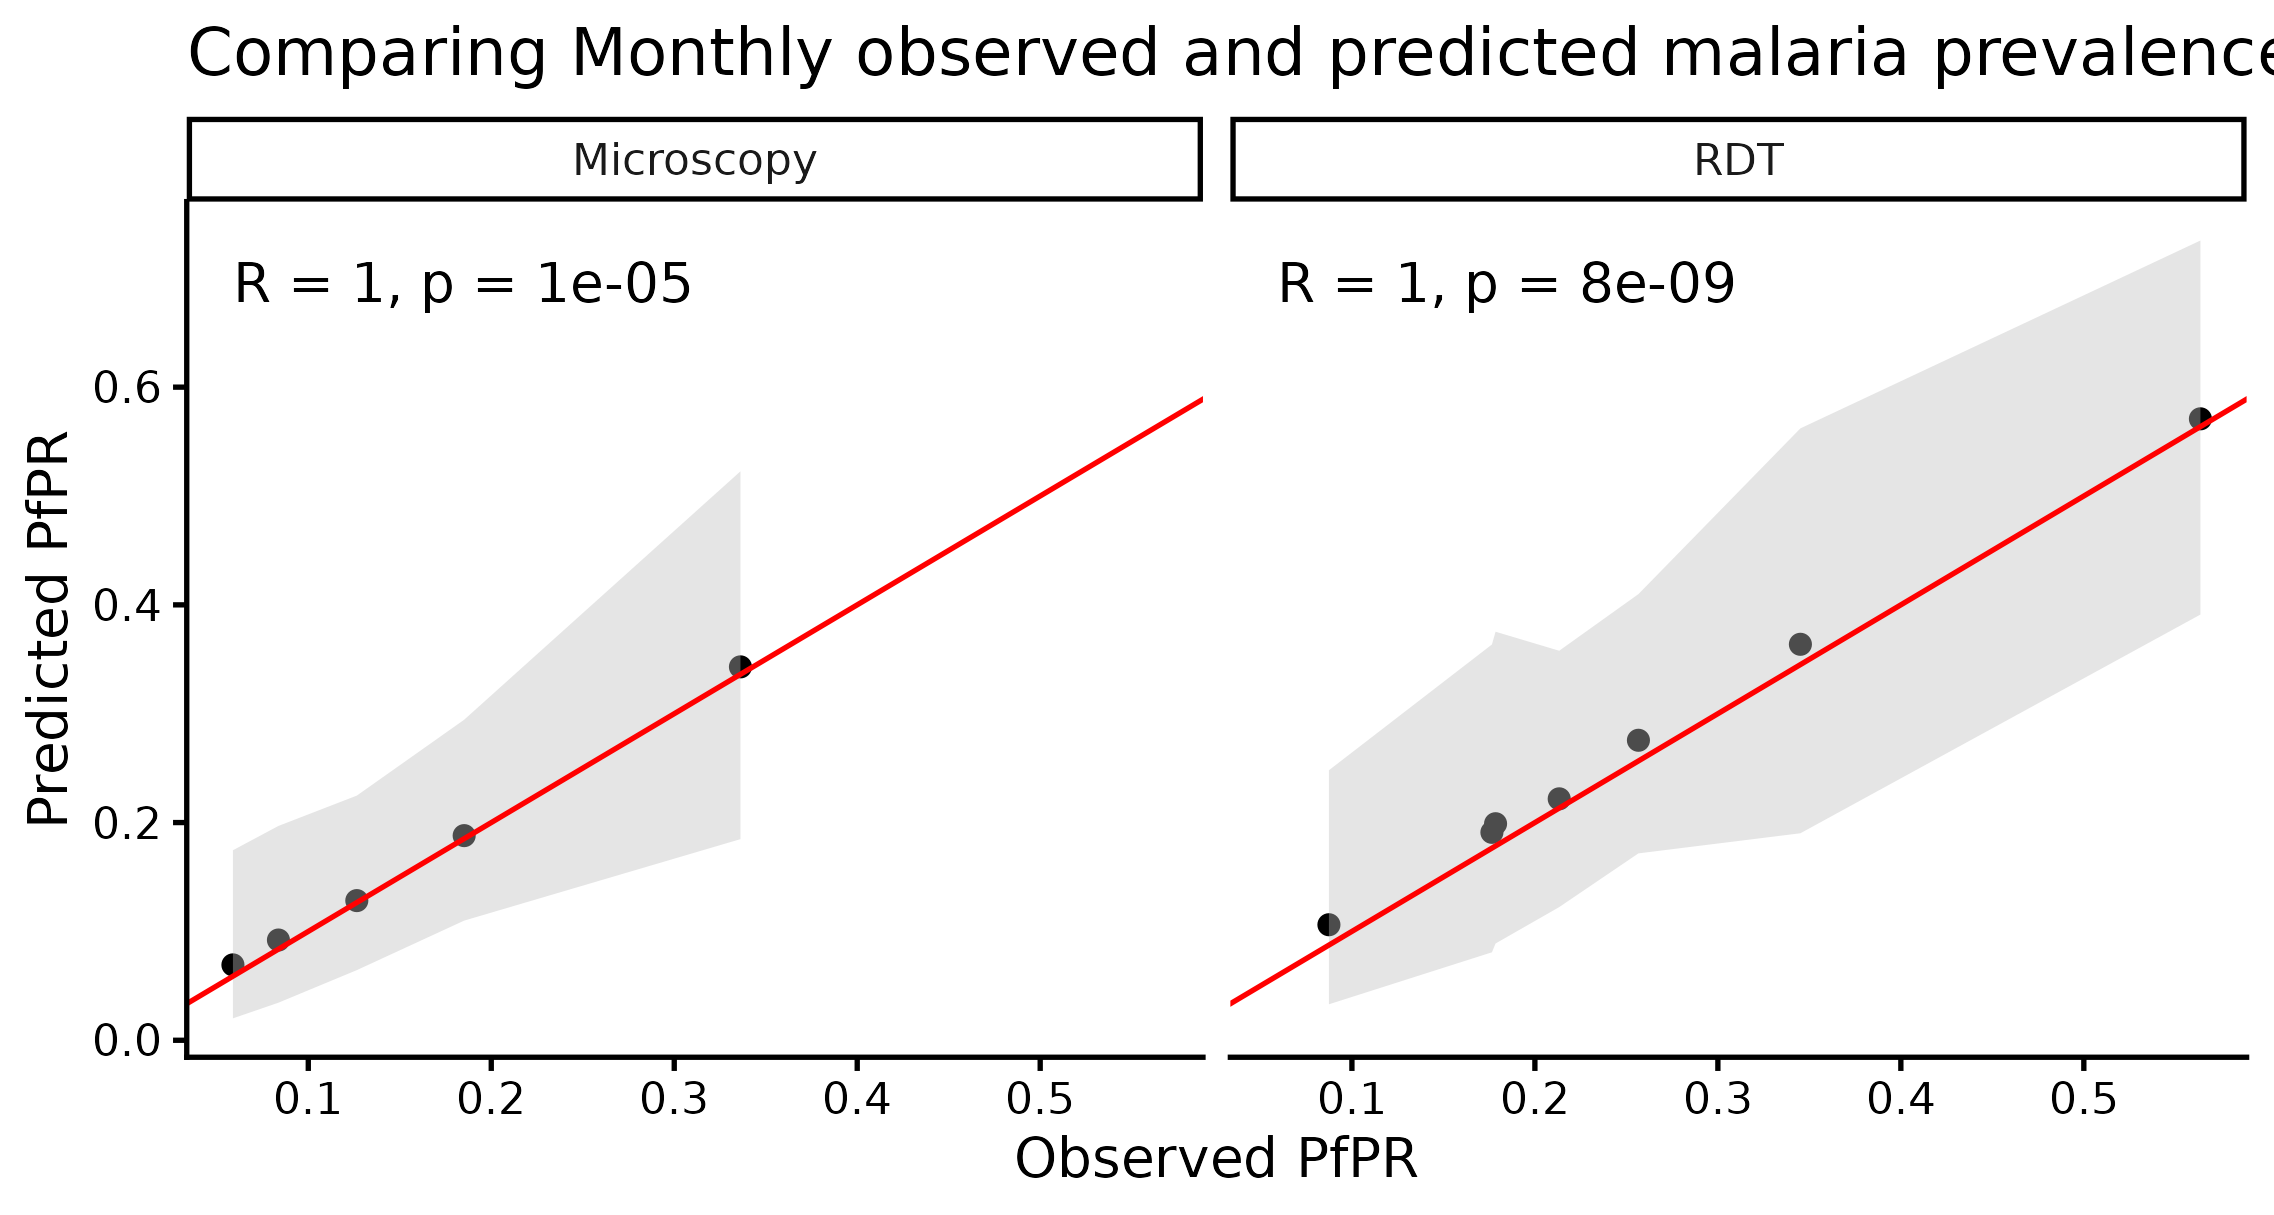


Supplementary Figure 9: In sample correlation plot between observed and predicted malaria prevalence by diagnostic method

Out of sample model validation
Results of the three cross-validation methods implemented are shown in Supplementary table 8.

Supplementary Table 8: Summary table of results from cross validation methods

| No | CV strategy | Number of folds | Mean RMSE | SD RMSE | Mean MAE | Mean Cor | Mean Bias | Mean 95% Covarage |
| --- | --- | --- | --- | --- | --- | --- | --- | --- |
| Microscopy | | | | | | | | |
| 1 | Spatial blocking | 10 | 0.208 | 0.0360 | 0.158 | 0.539 | 0.00597 | 0.516 |
| 2 | LOTBO | 5 | 0.173 | 0.0752 | 0.128 | 0.402 | -0.0191 | 0.414 |
| 3 | ST-CV | 47 | 0.168 | 0.0674 | 0.133 | 0.426 | 0.00358 | 0.524 |
| RDT | | | | | | | | |
| 4 | Spatial blocking | 10 | 0.247 | 0.0264 | 0.201 | 0.642 | 0.0162 | 0.592 |
| 5 | LOTBO | 7 | 0.220 | 0.0606 | 0.172 | 0.482 | -0.00776 | 0.480 |
| 6 | ST-CV | 67 | 0.214 | 0.0652 | 0.177 | 0.444 | 0.00880 | 0.598 |

Key: LOTBO: Leave-one-temporal-block-out; ST-CV: Spatio-temporal cross-validation

Supplementary Figure 10 shows the outputs for each of the cross validation strategies implemented during model validation.


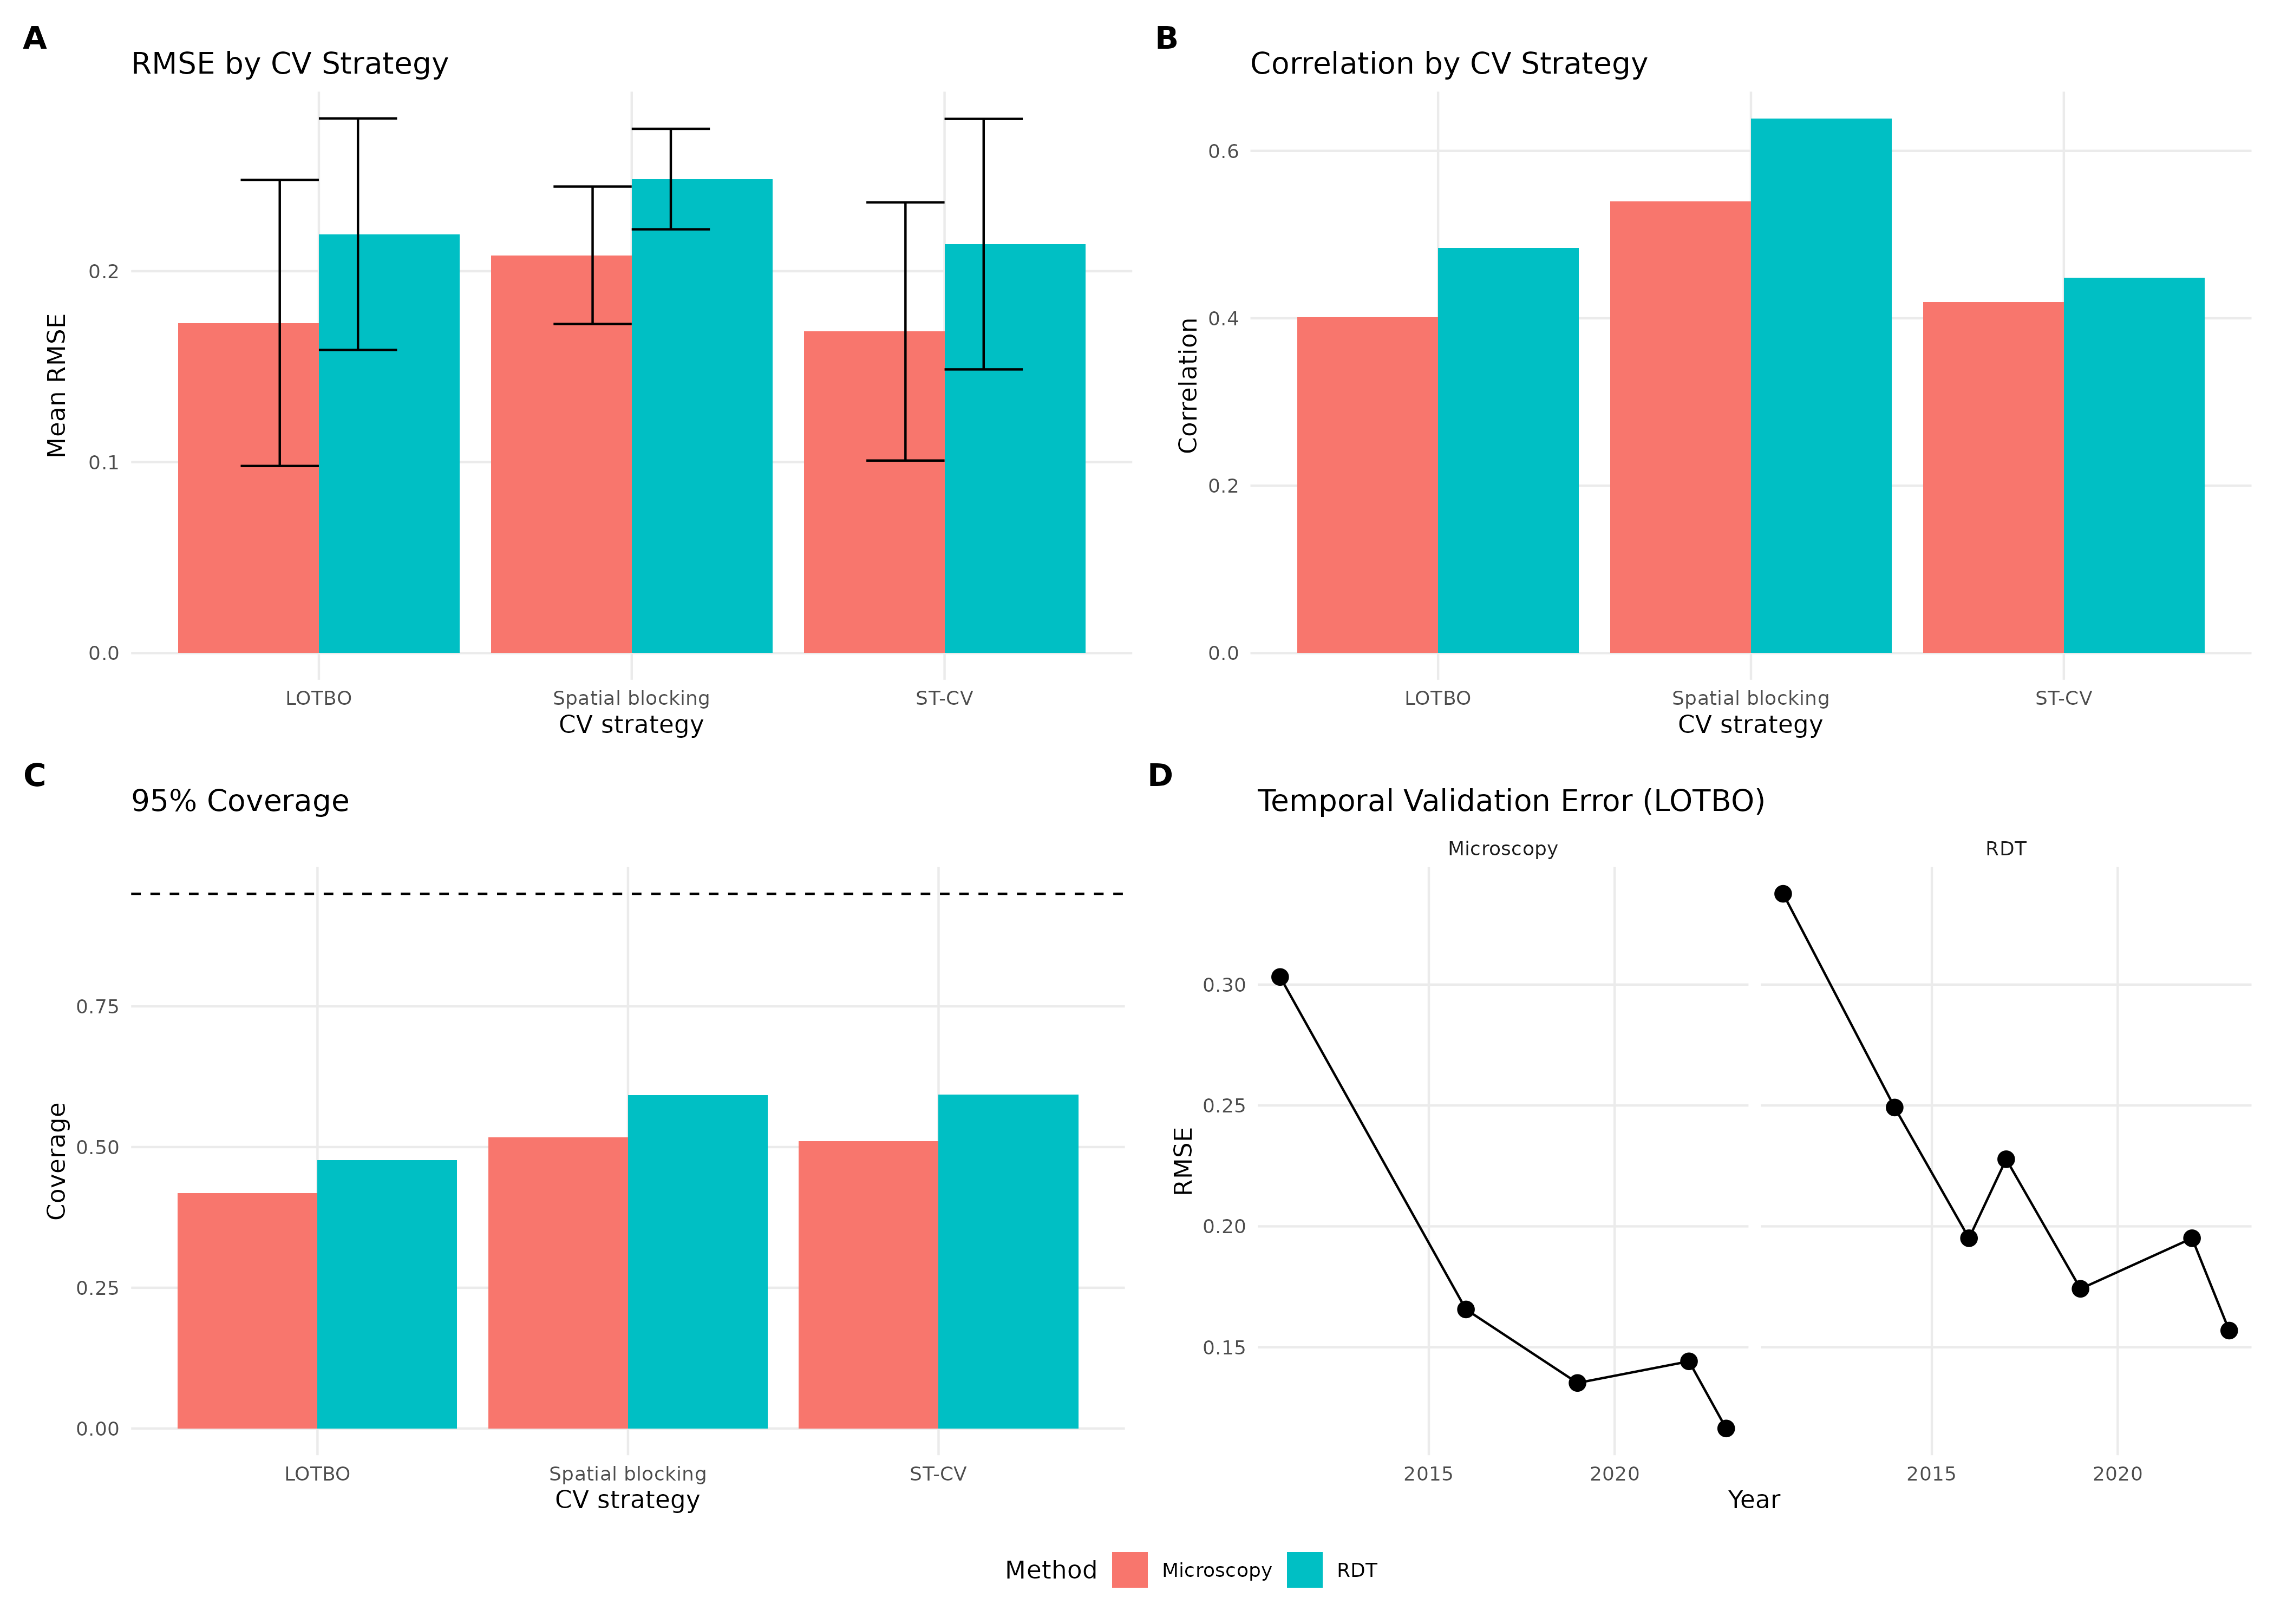


Supplementary Figure 10: Cross-validation plots for spatial, temporal and spatio-temporal strategies.

## Predicted malaria prevalence

Predicted malaria prevalence for both diagnostic methods are shown in Supplementary Table 9.

Supplementary Table 9: Predicted microscopy and RDT prevalence by year with 95% credible intervals

| Year | Microscopy | | | RDT | | |
| --- | --- | --- | --- | --- | --- | --- |
|  | Predicted PfPR | Lower CrI | Upper CrI | Predicted PfPR | Lower CrI | Upper CrI |
| 2011 | 0.231 | 0.078 | 0.442 | 0.427 | 0.207 | 0.633 |
| 2012 | 0.204 | 0.075 | 0.384 | 0.379 | 0.189 | 0.570 |
| 2013 | 0.182 | 0.061 | 0.359 | 0.333 | 0.150 | 0.530 |
| 2014 | 0.177 | 0.048 | 0.382 | 0.307 | 0.111 | 0.535 |
| 2015 | 0.151 | 0.046 | 0.322 | 0.253 | 0.095 | 0.460 |
| 2016 | 0.139 | 0.032 | 0.338 | 0.211 | 0.057 | 0.445 |
| 2017 | 0.134 | 0.025 | 0.352 | 0.210 | 0.047 | 0.475 |
| 2018 | 0.113 | 0.028 | 0.275 | 0.190 | 0.055 | 0.398 |
| 2019 | 0.103 | 0.021 | 0.276 | 0.179 | 0.044 | 0.404 |
| 2020 | 0.077 | 0.019 | 0.198 | 0.147 | 0.042 | 0.325 |
| 2021 | 0.063 | 0.015 | 0.164 | 0.129 | 0.037 | 0.289 |
| 2022 | 0.054 | 0.011 | 0.158 | 0.118 | 0.028 | 0.291 |
| 2023 | 0.051 | 0.007 | 0.172 | 0.080 | 0.012 | 0.244 |
| 2024 | 0.046 | 0.006 | 0.157 | 0.072 | 0.010 | 0.223 |
| 2025 | 0.044 | 0.006 | 0.151 | 0.069 | 0.010 | 0.217 |

## Prediction maps with 95% Credible interval

Here we show the predicted malaria prevalence maps for microscopy and RDT from 2011 to 2025.

### Microscopy Predicted Prevalence maps

| 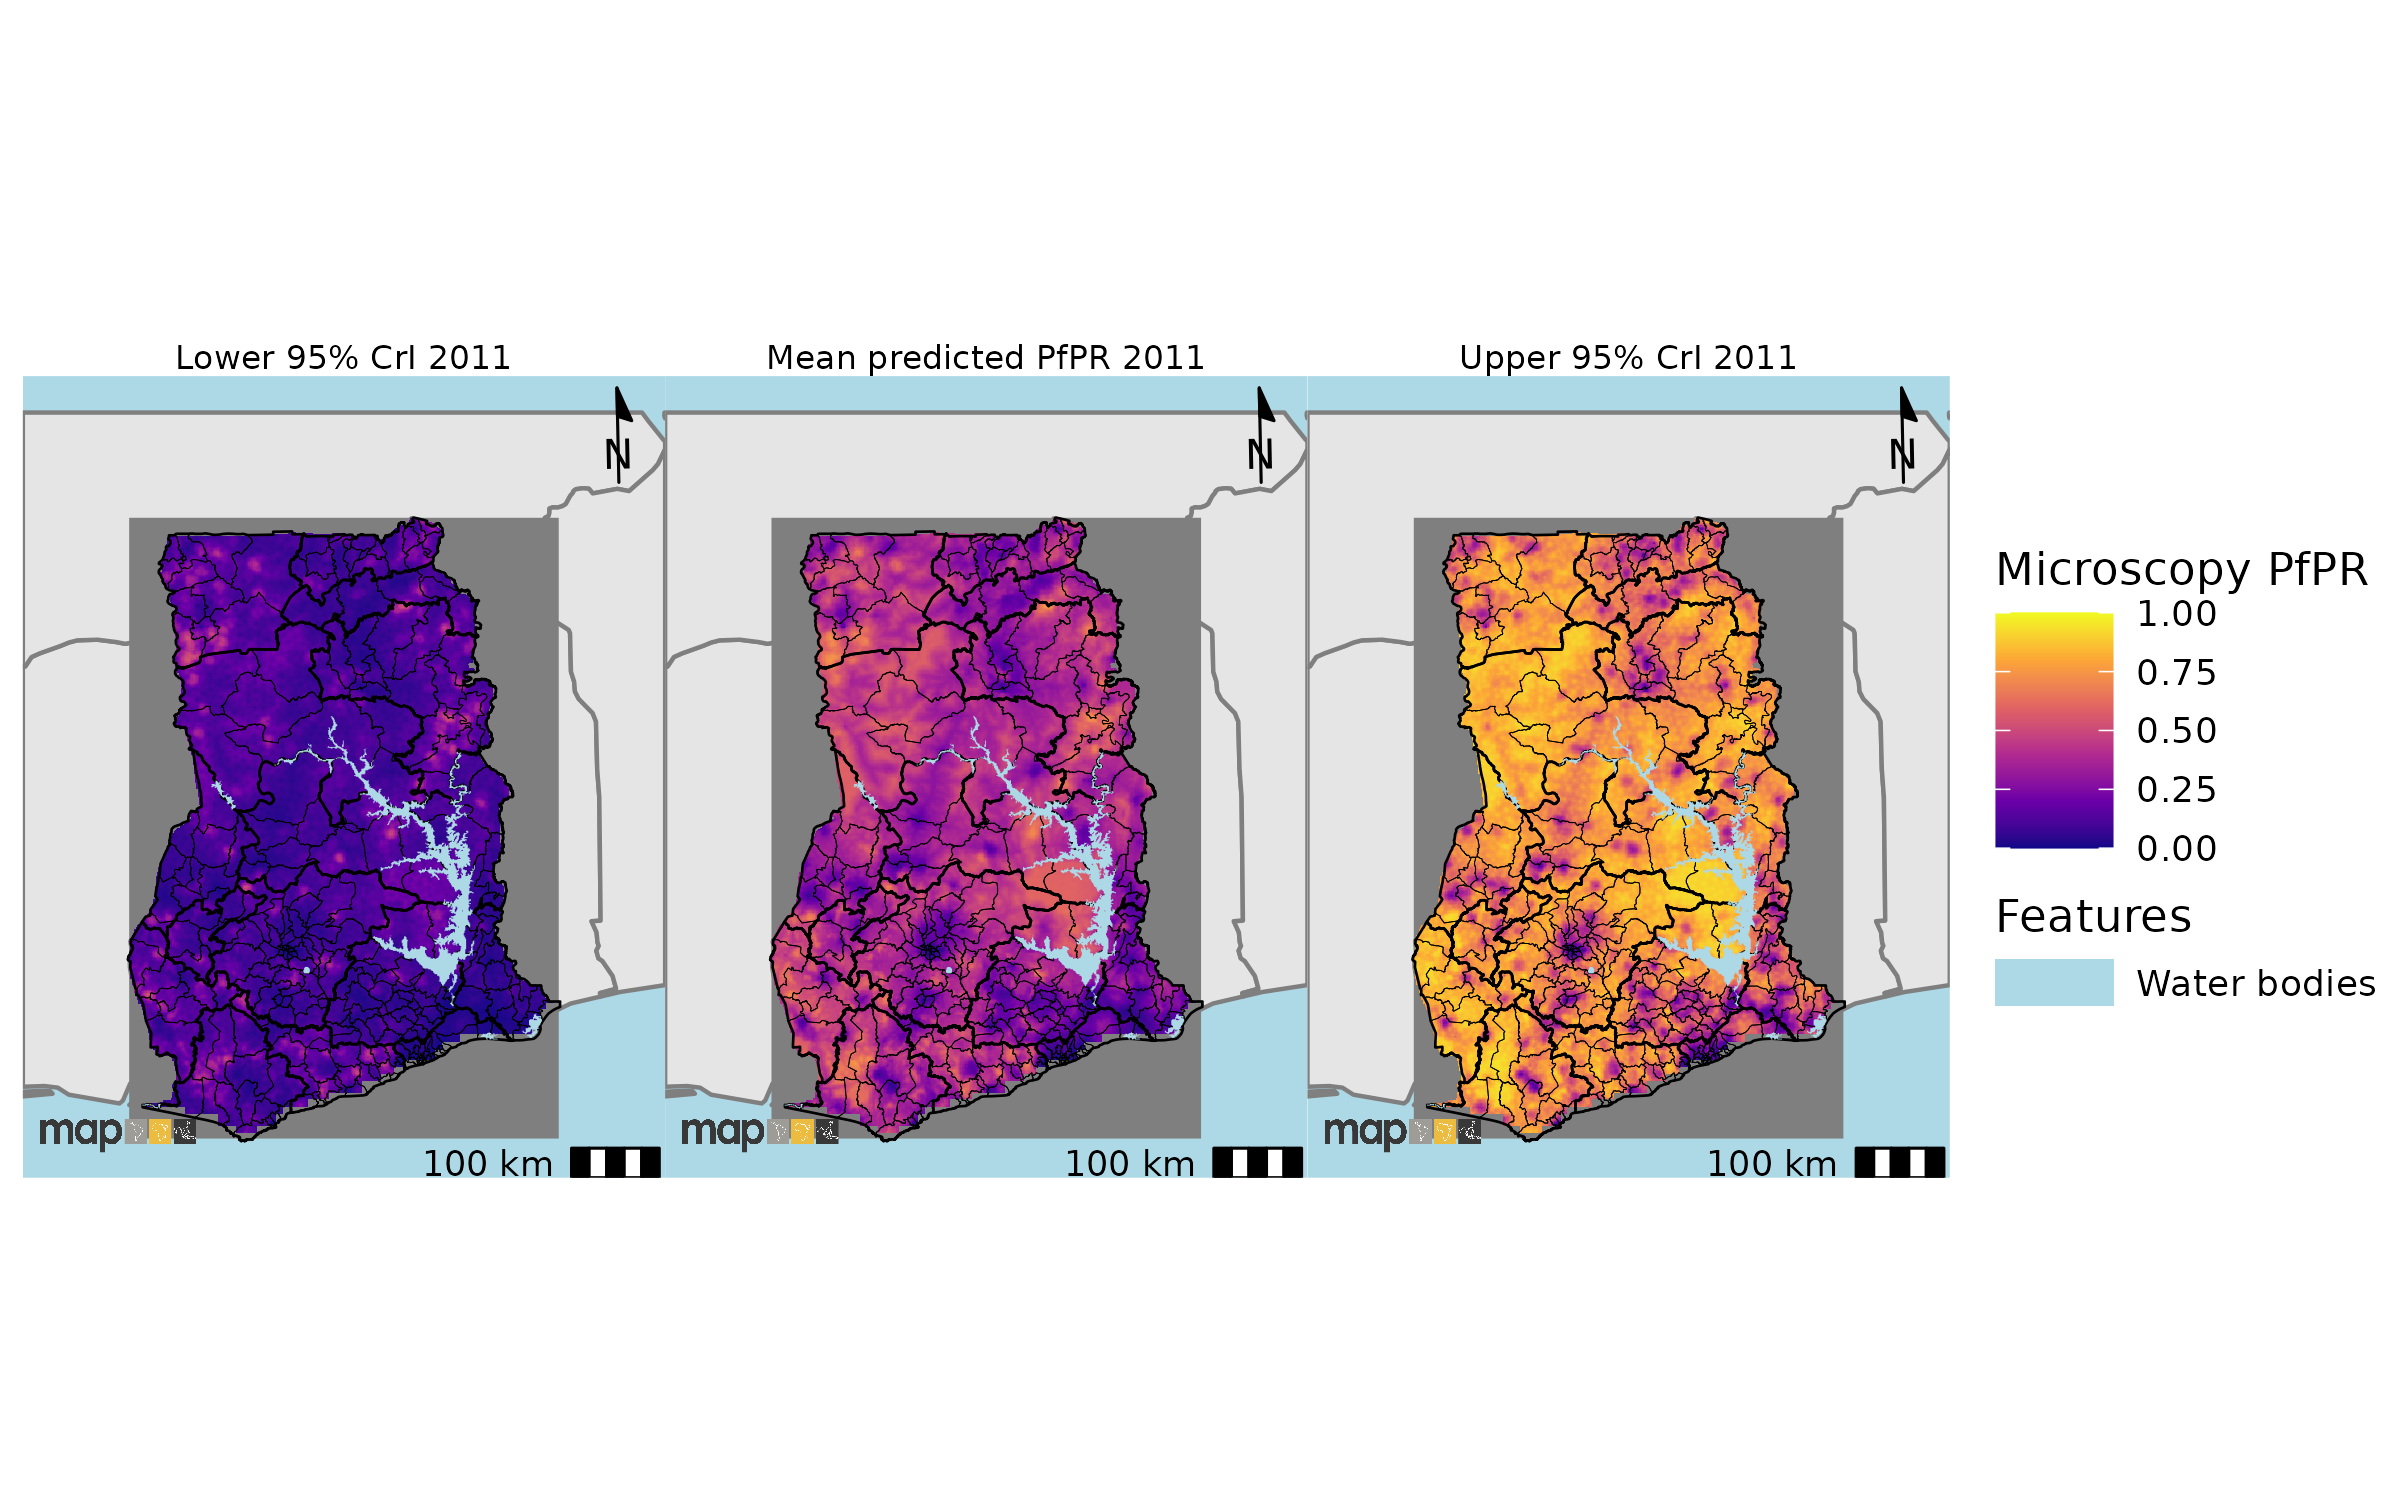 |
| --- |
| 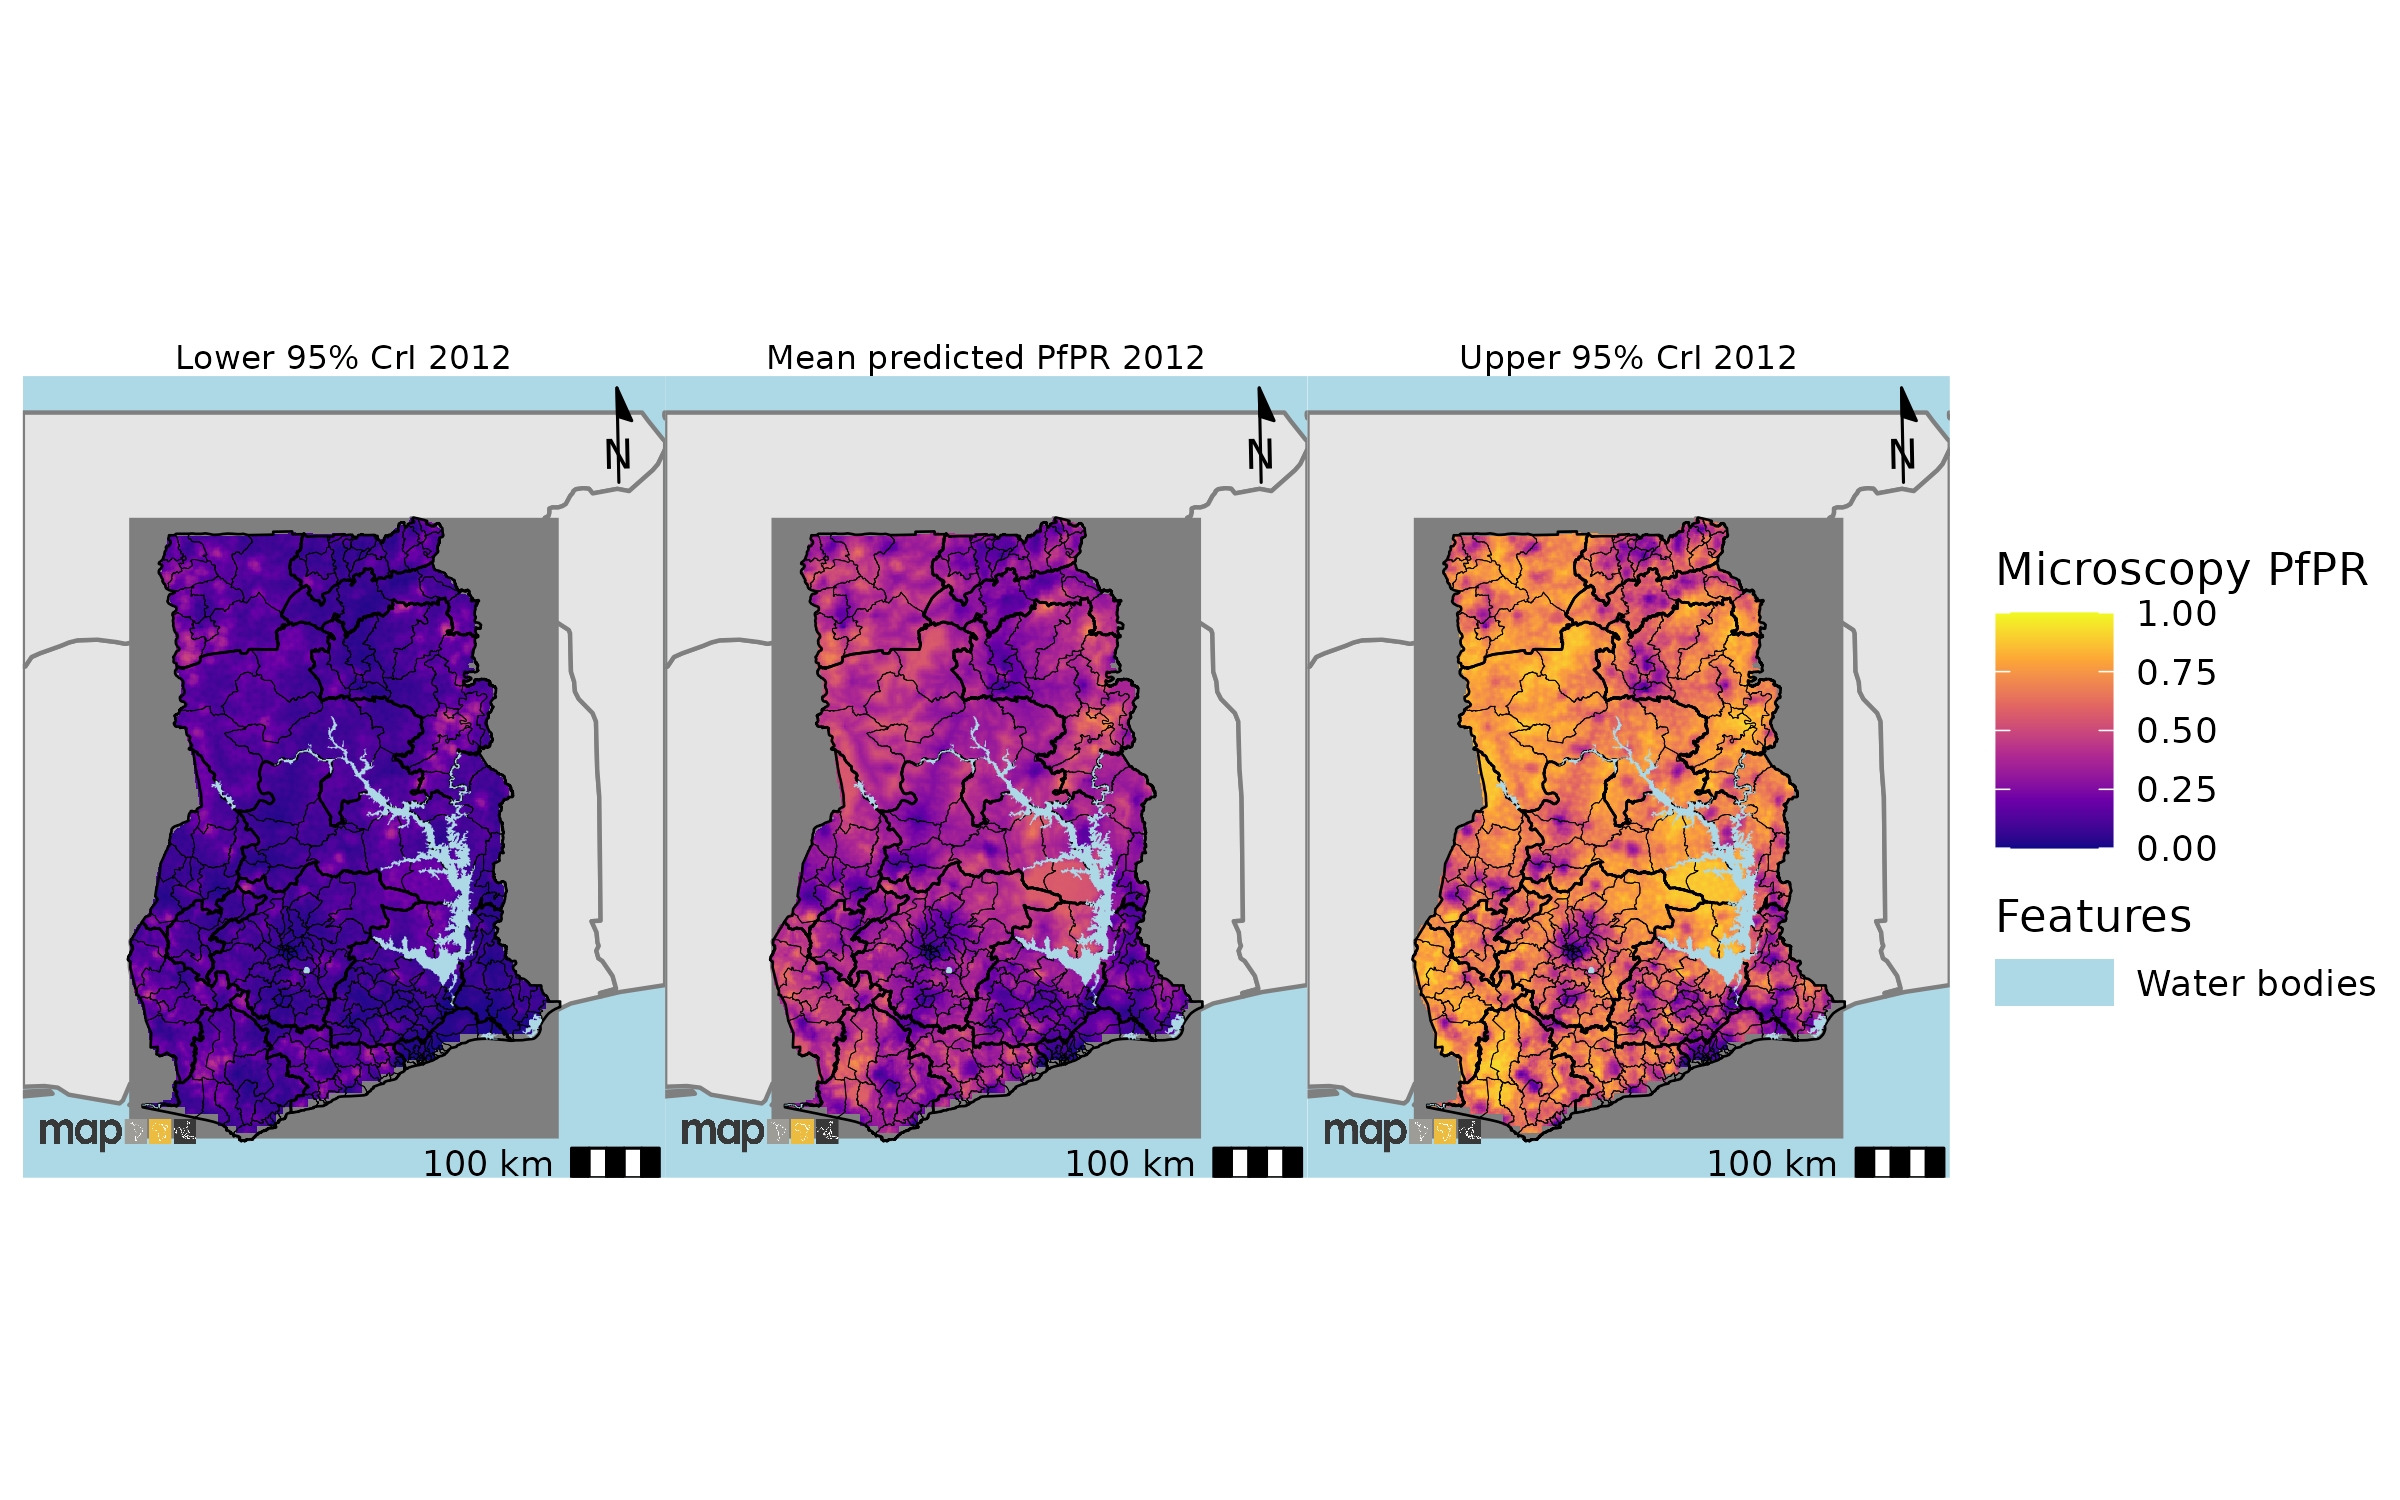 |
| 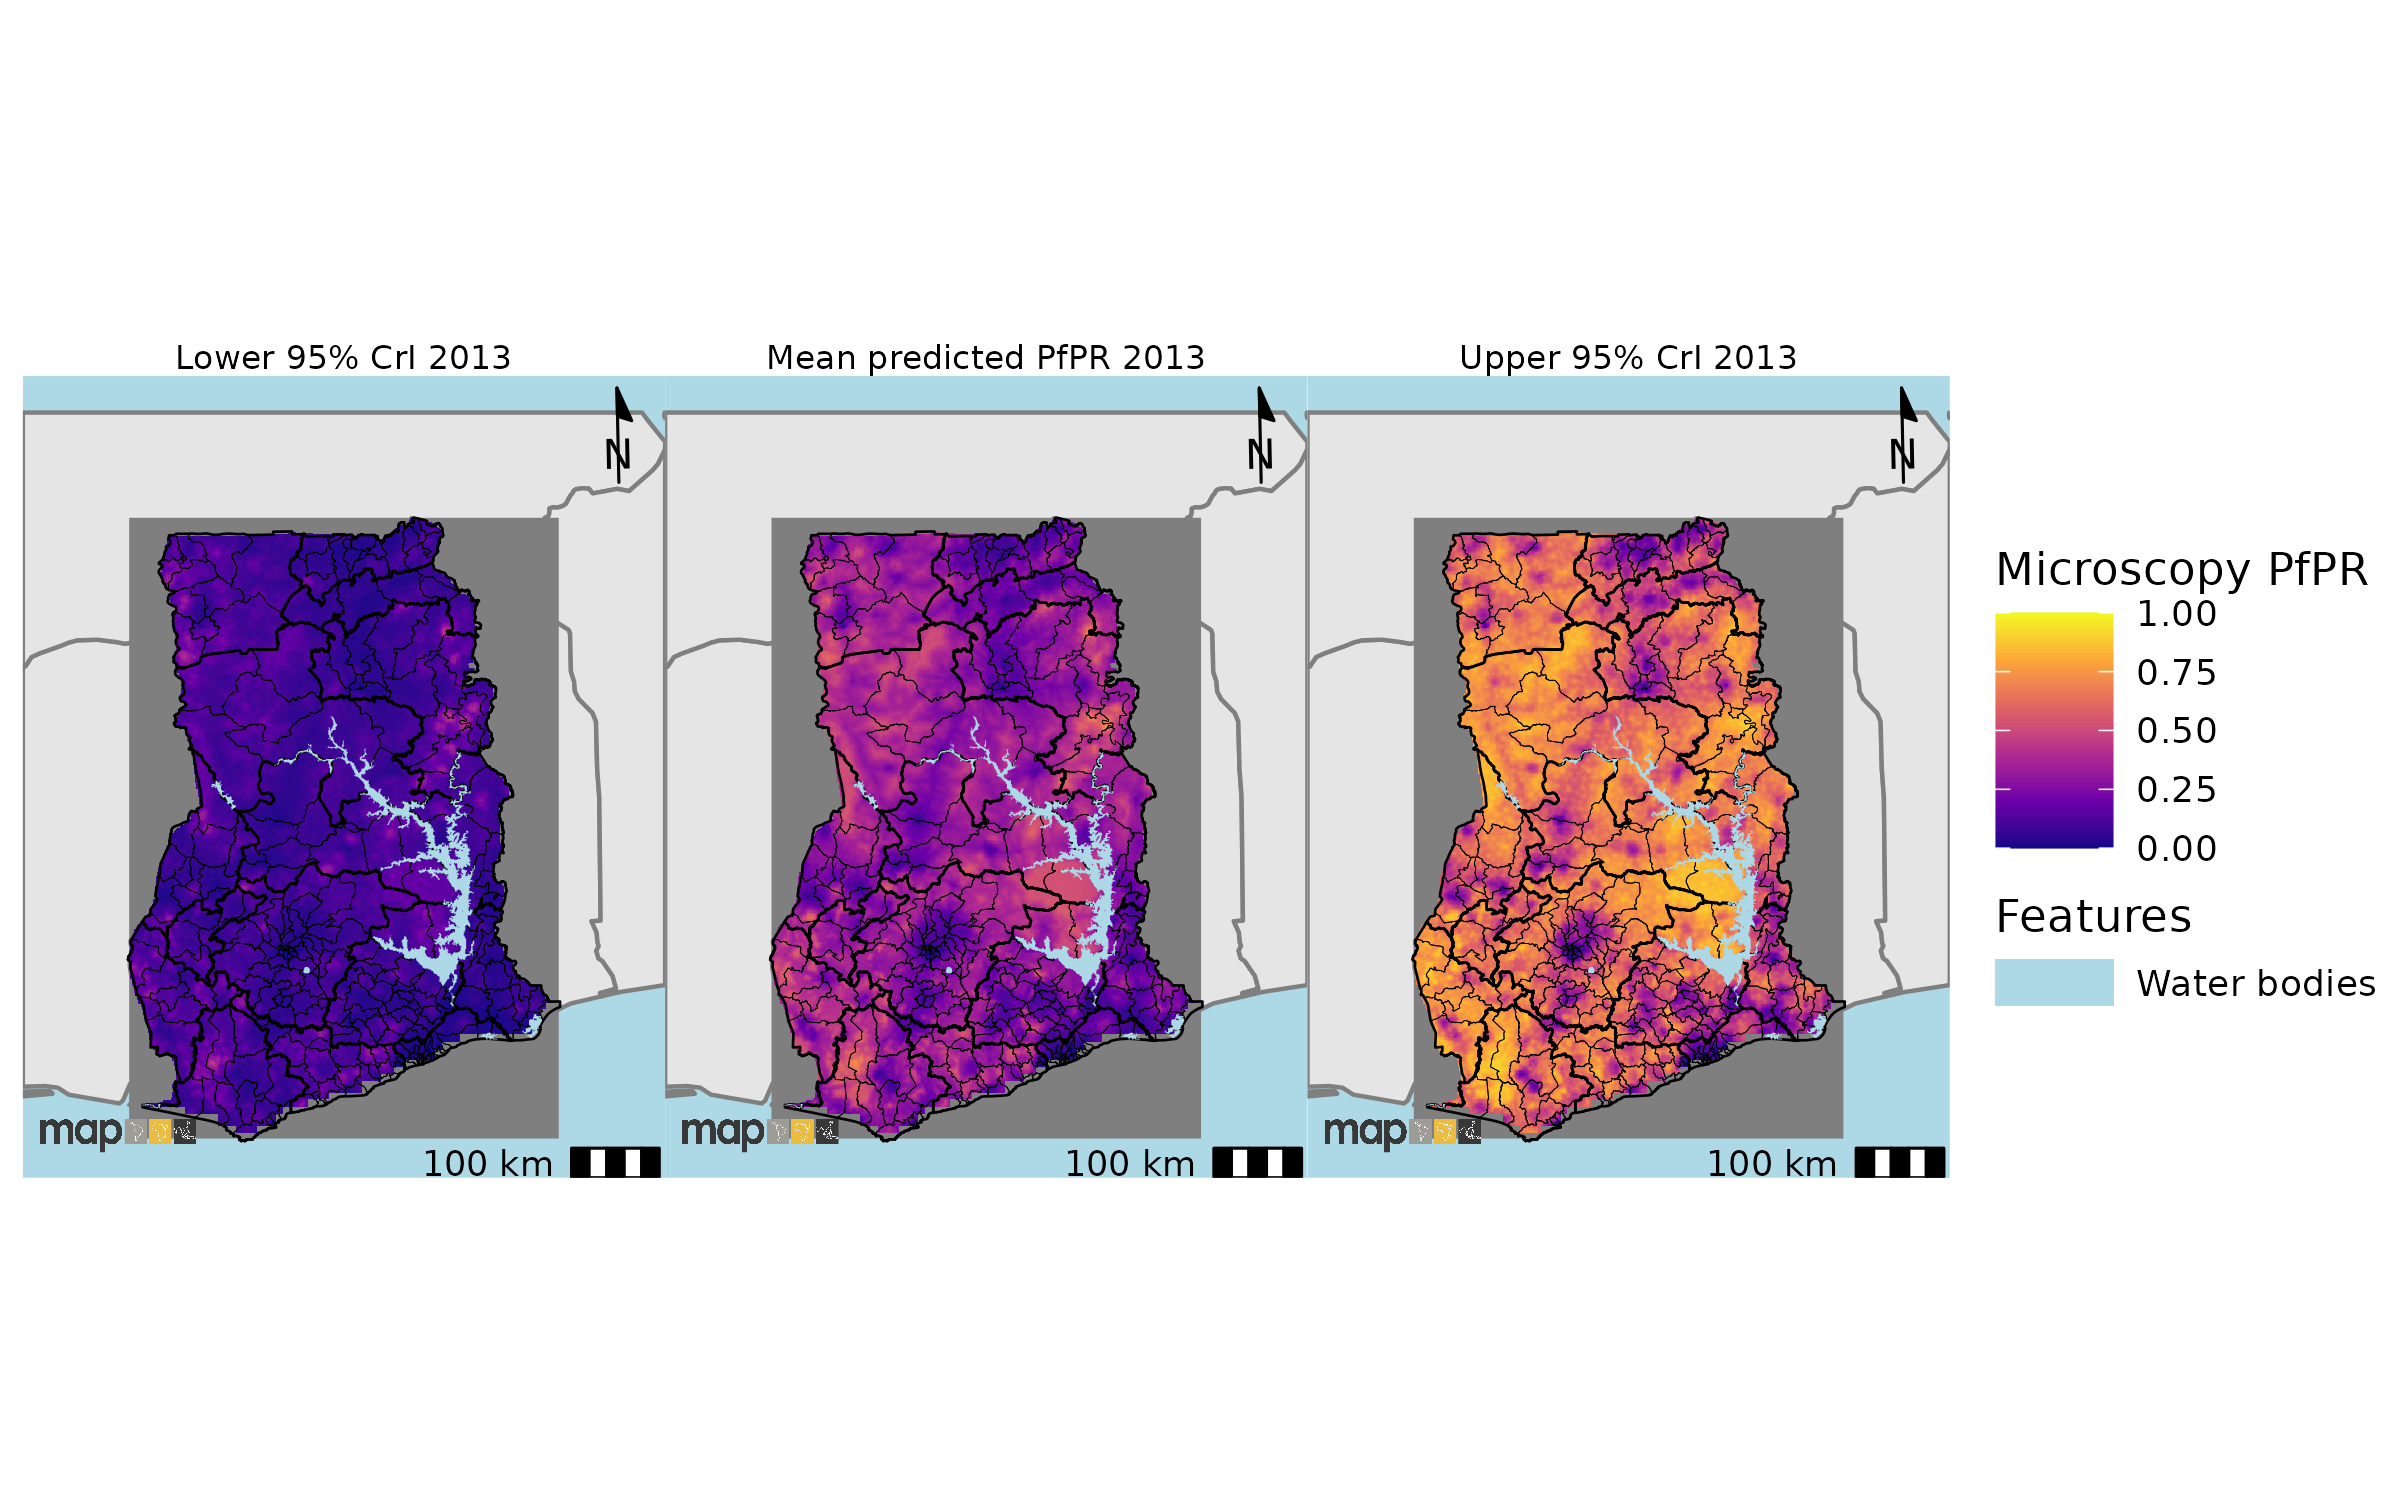 |
| 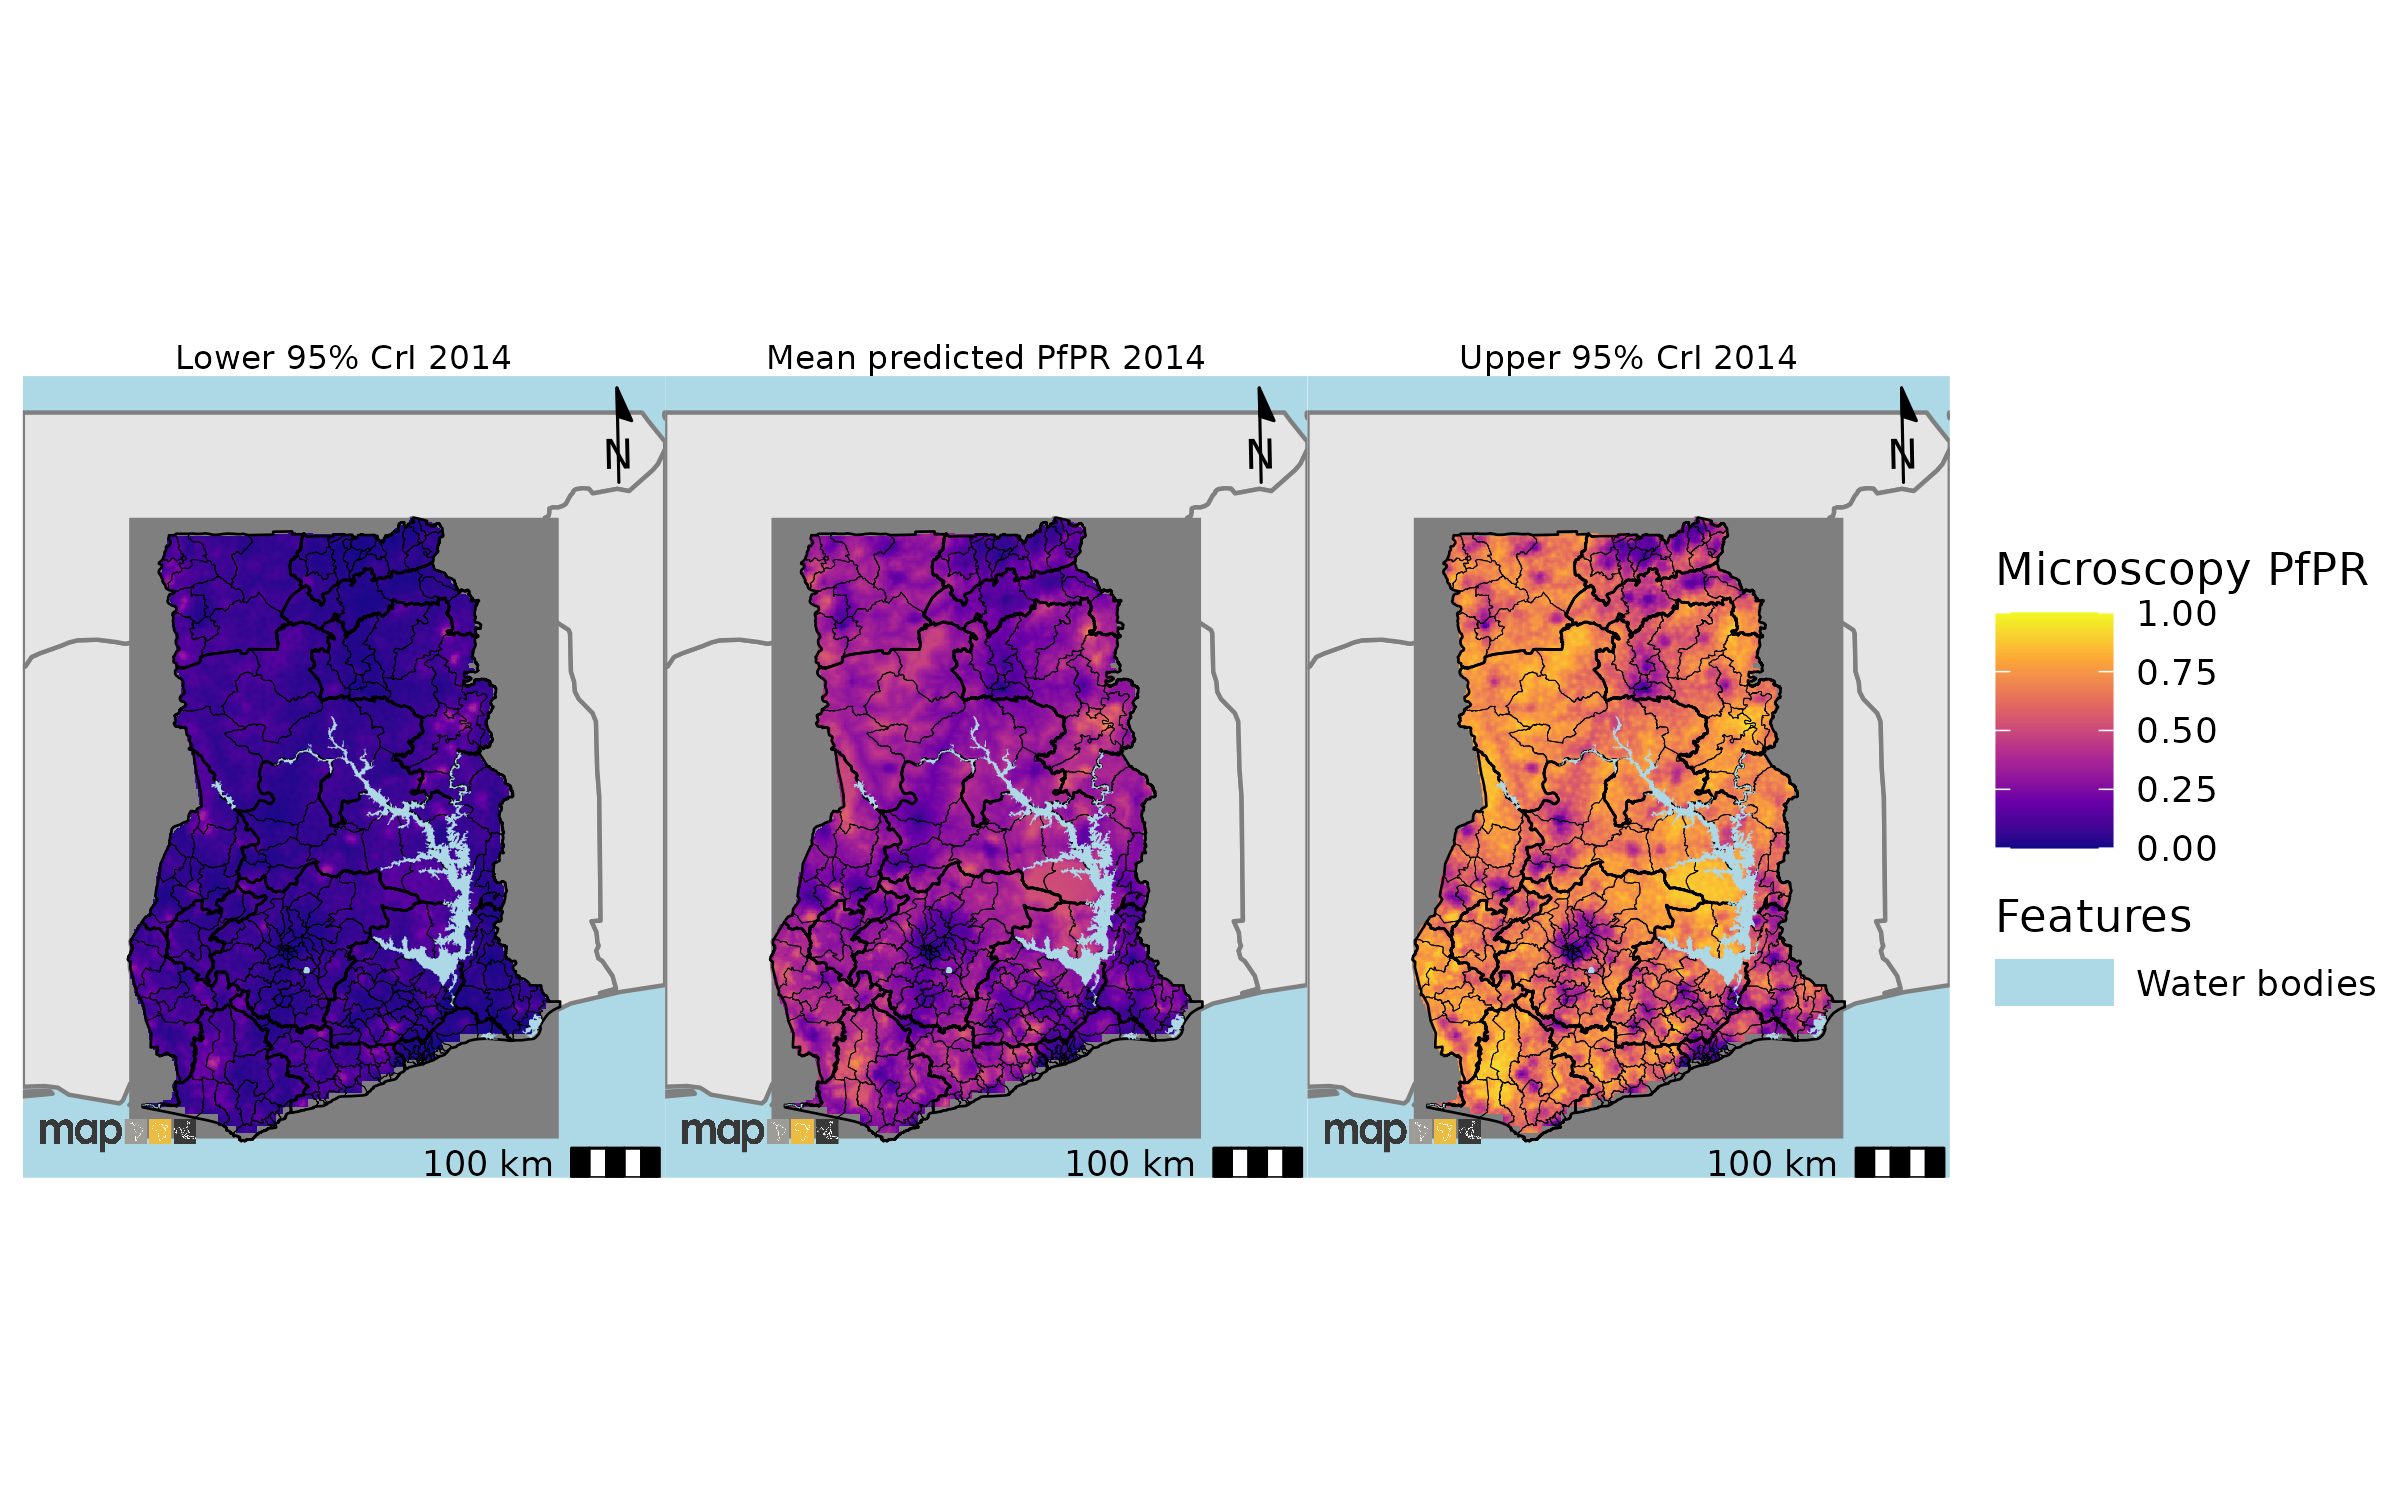 |
| 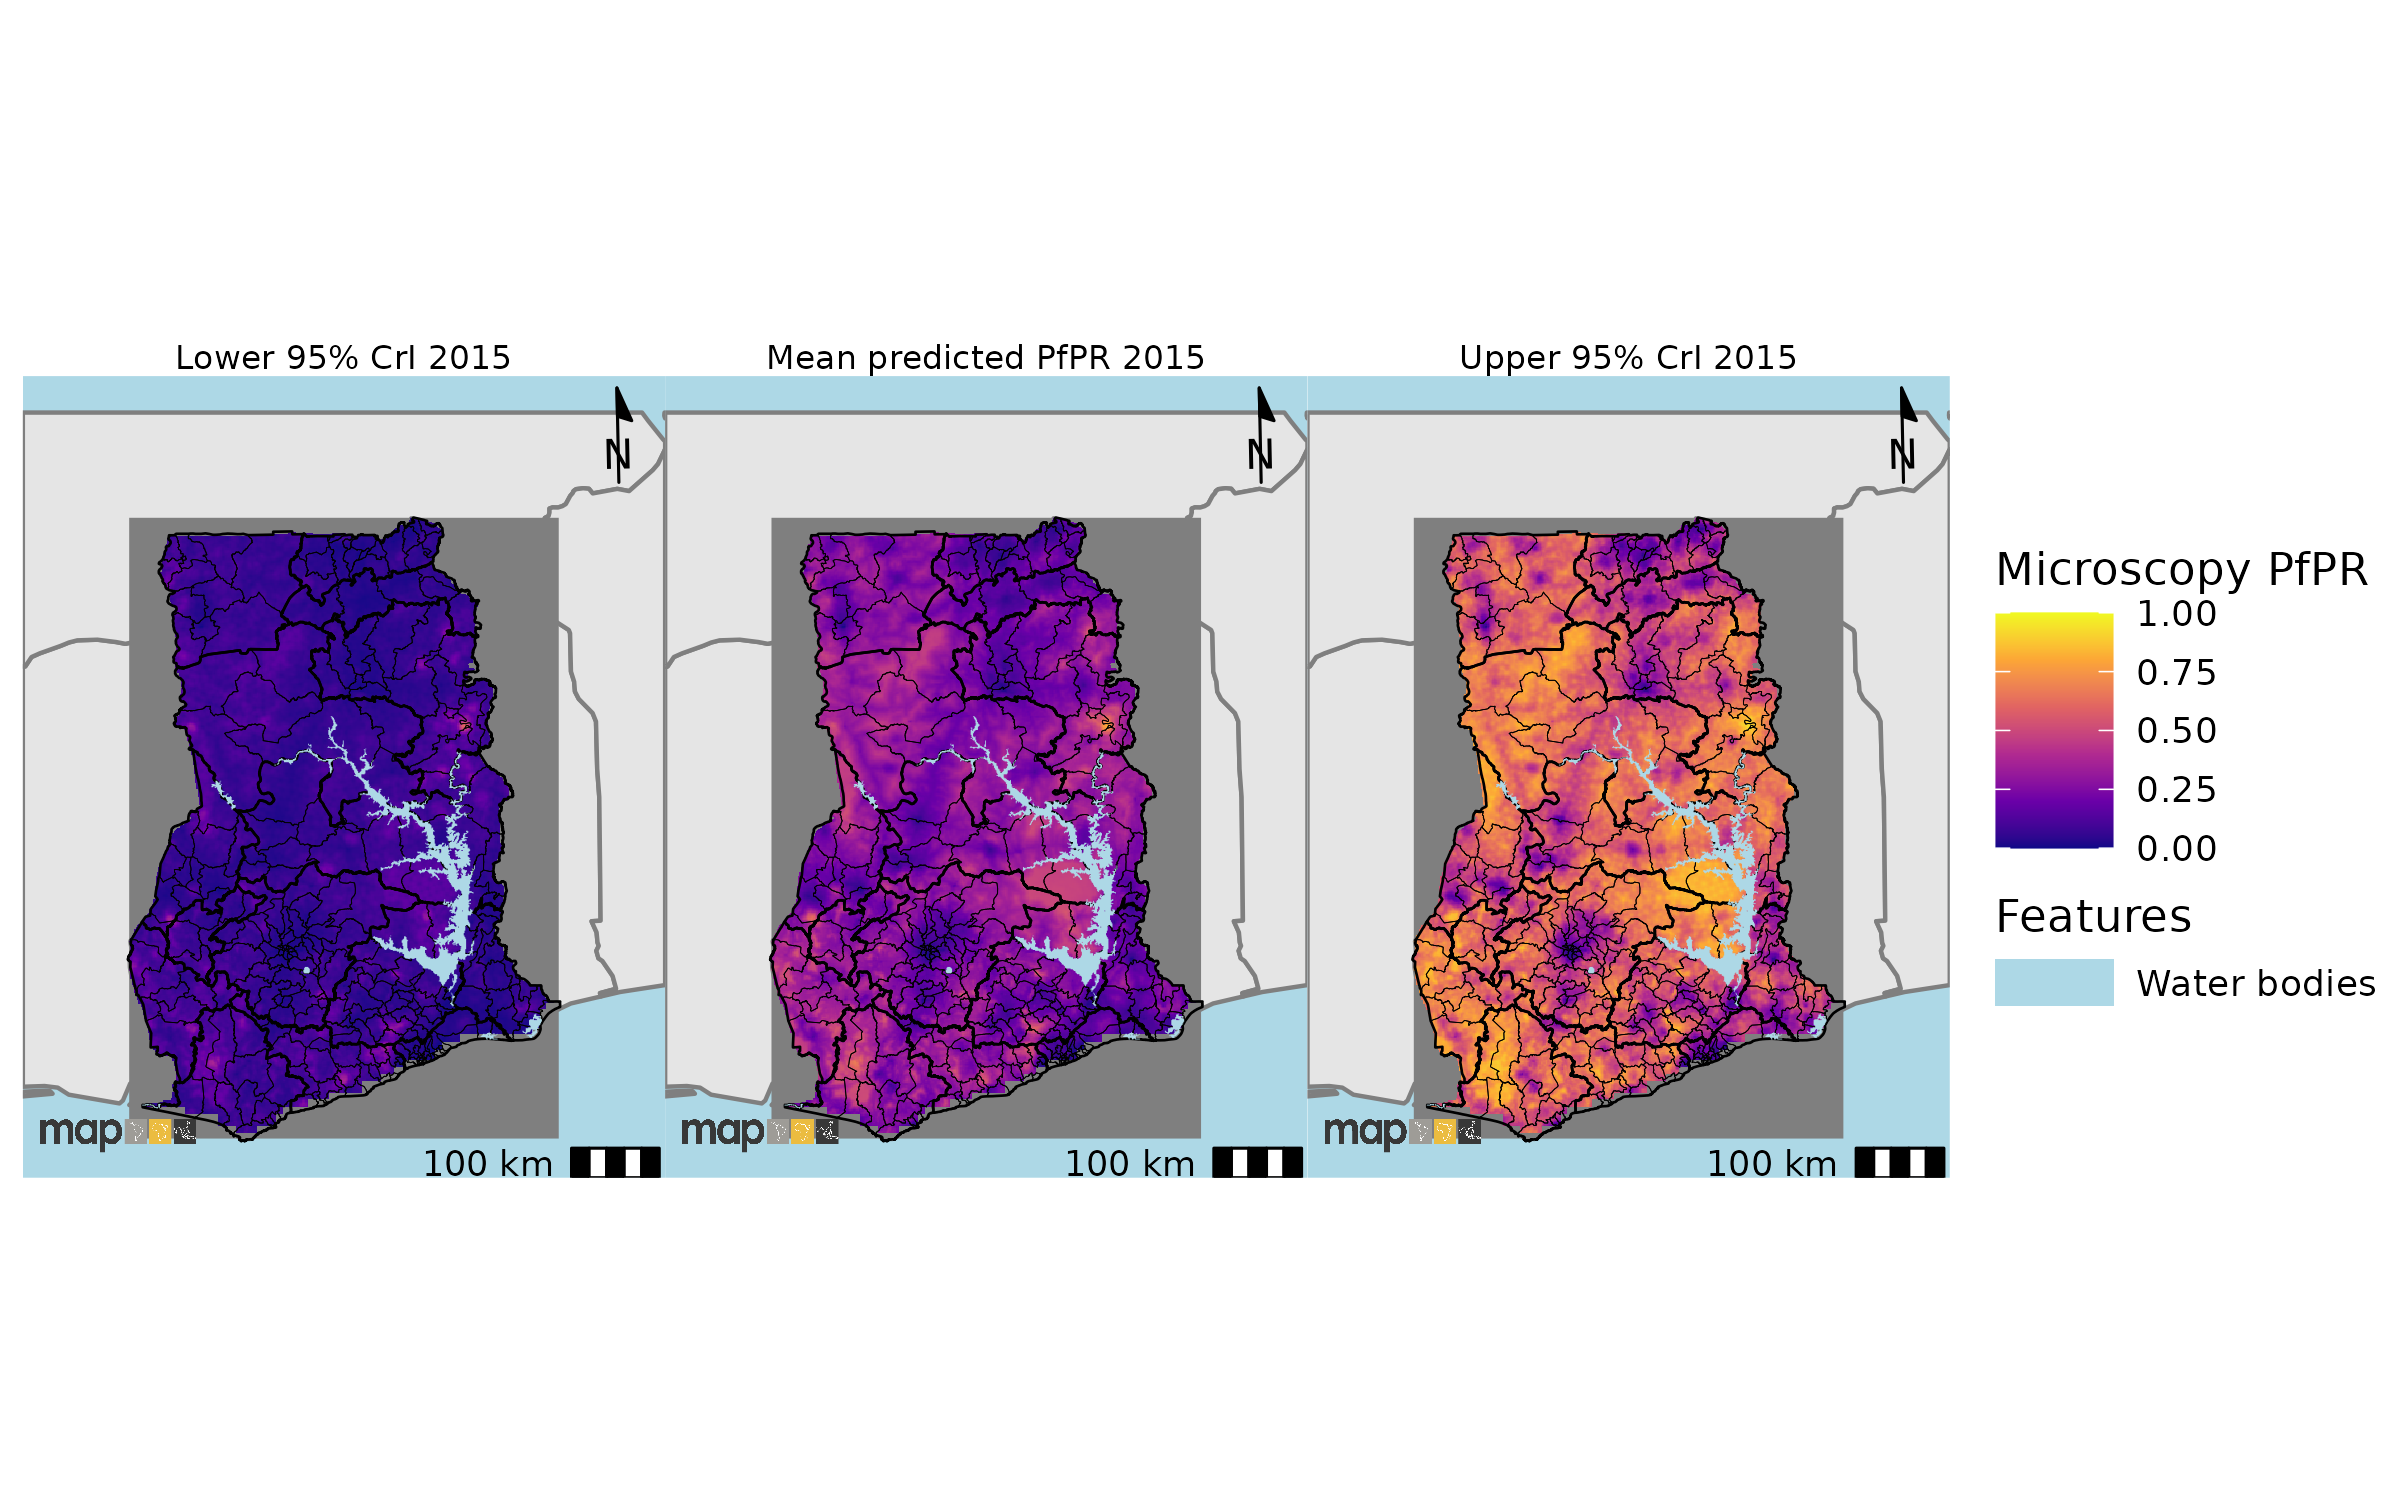 |
| 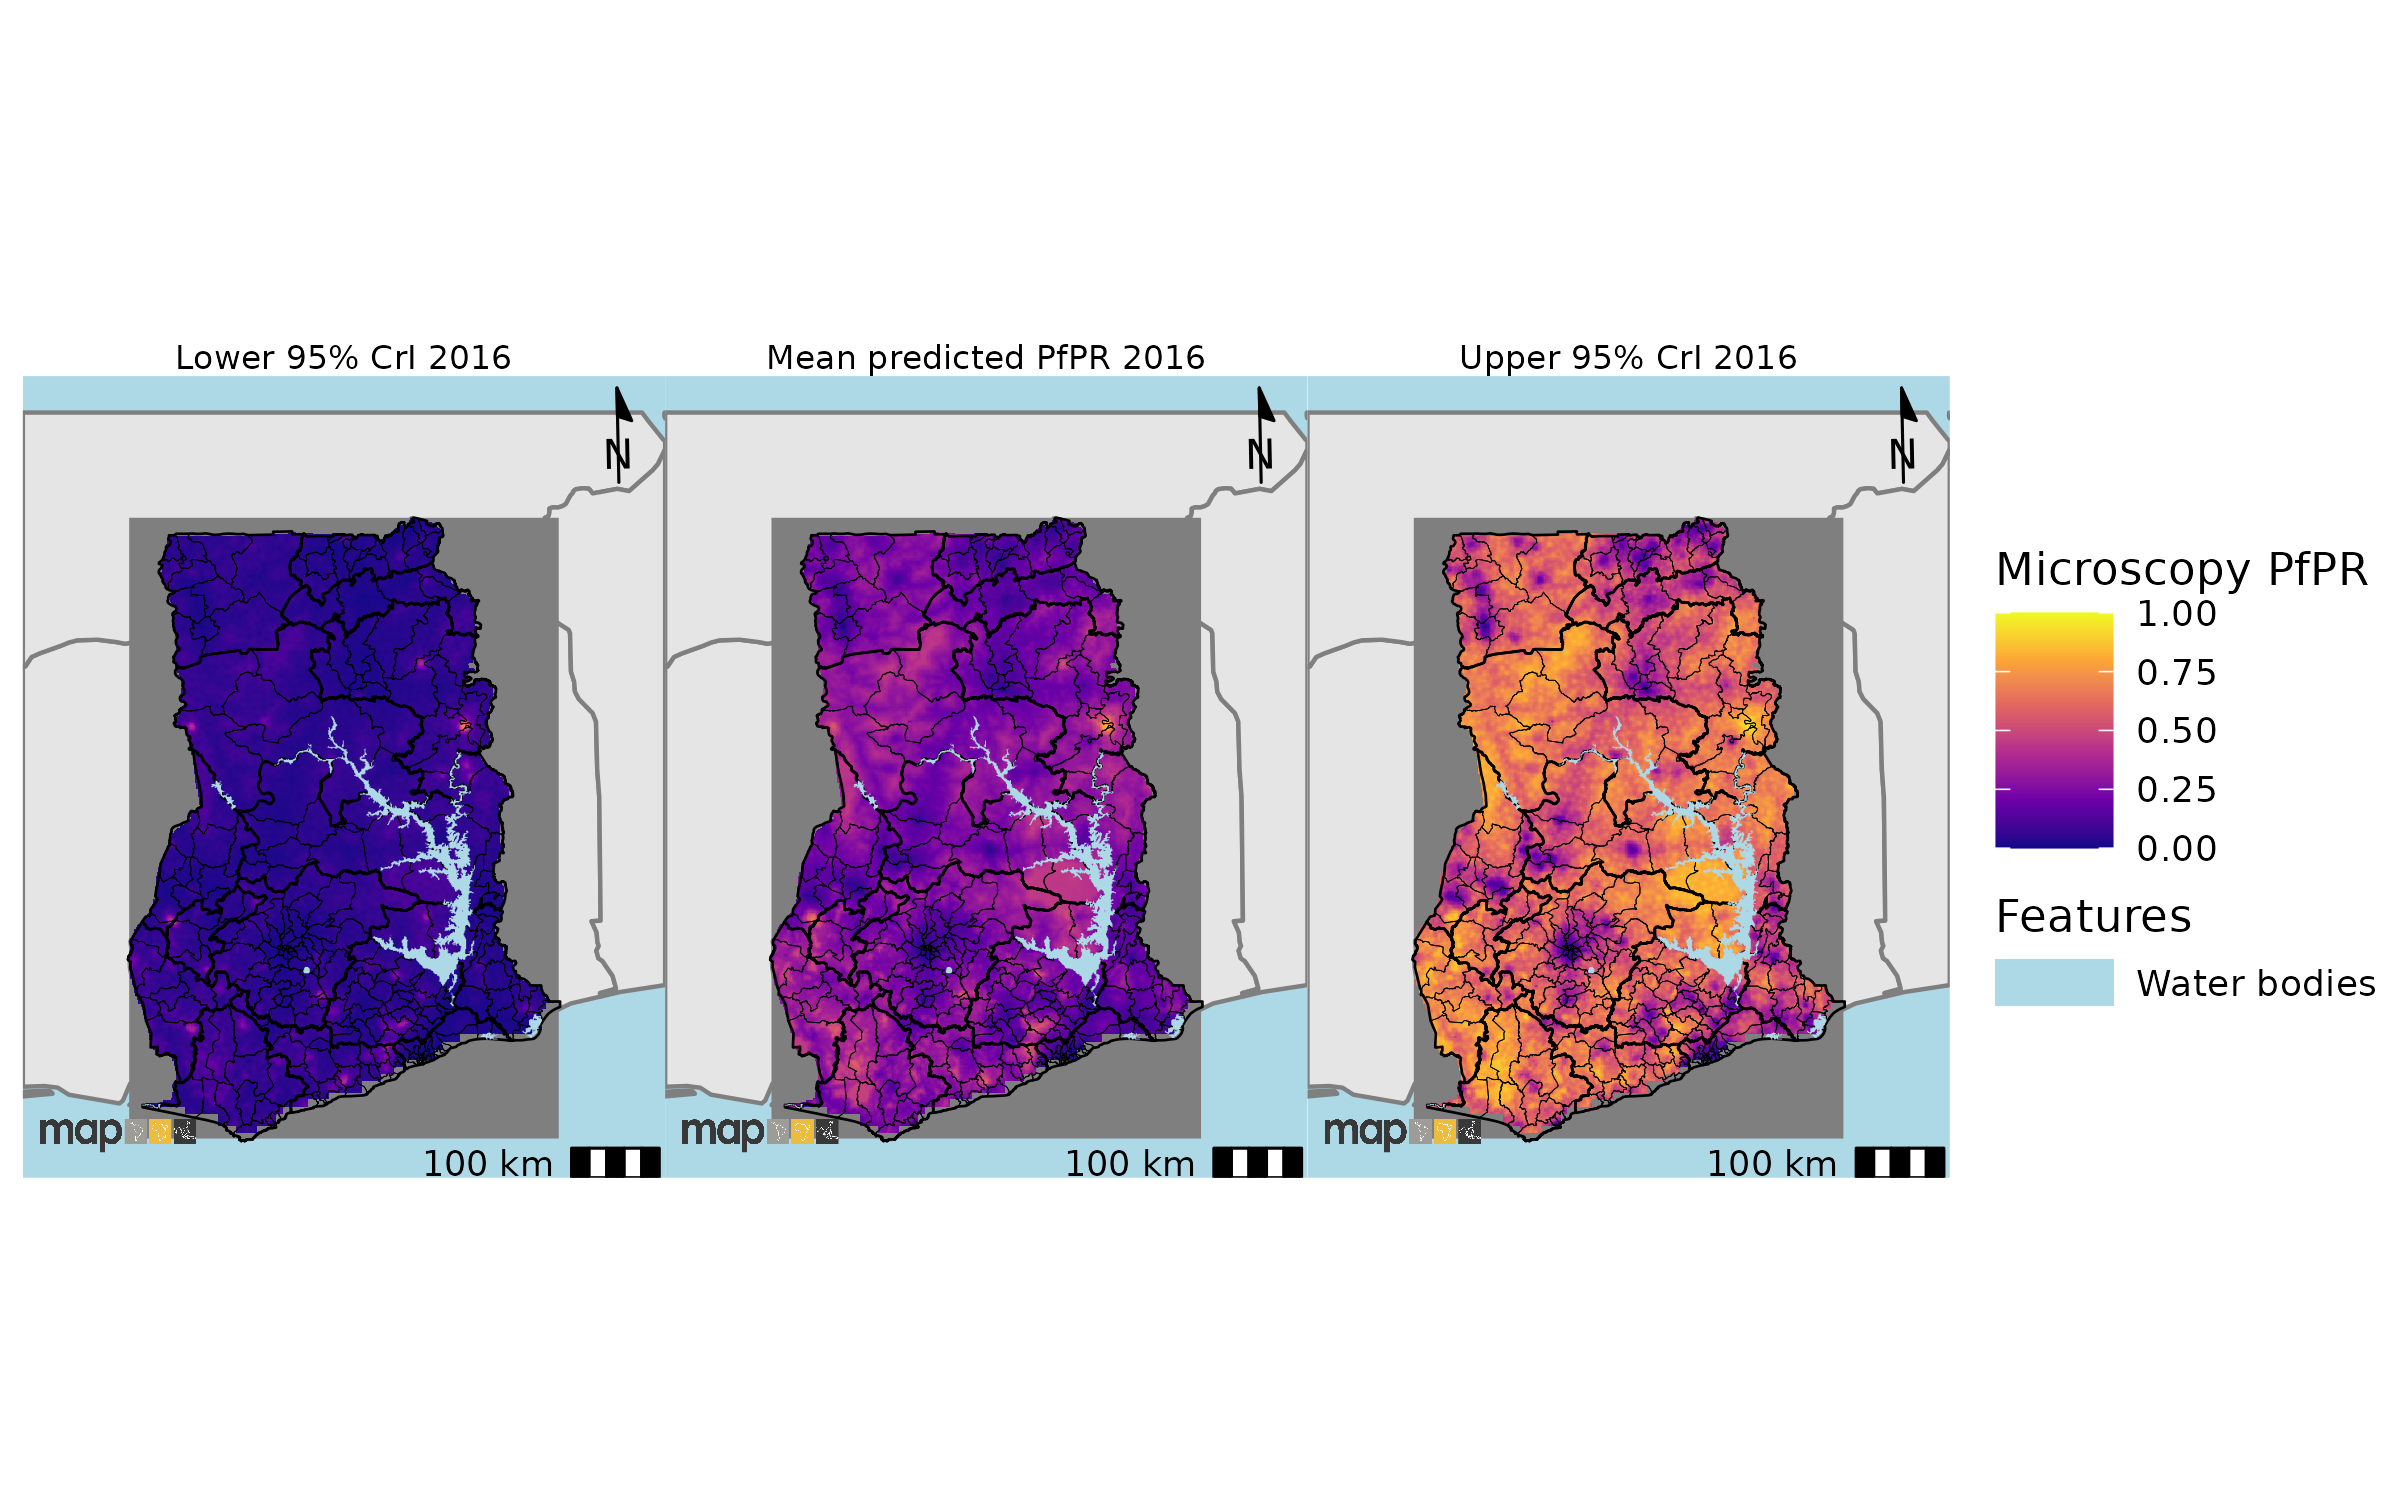 |
| 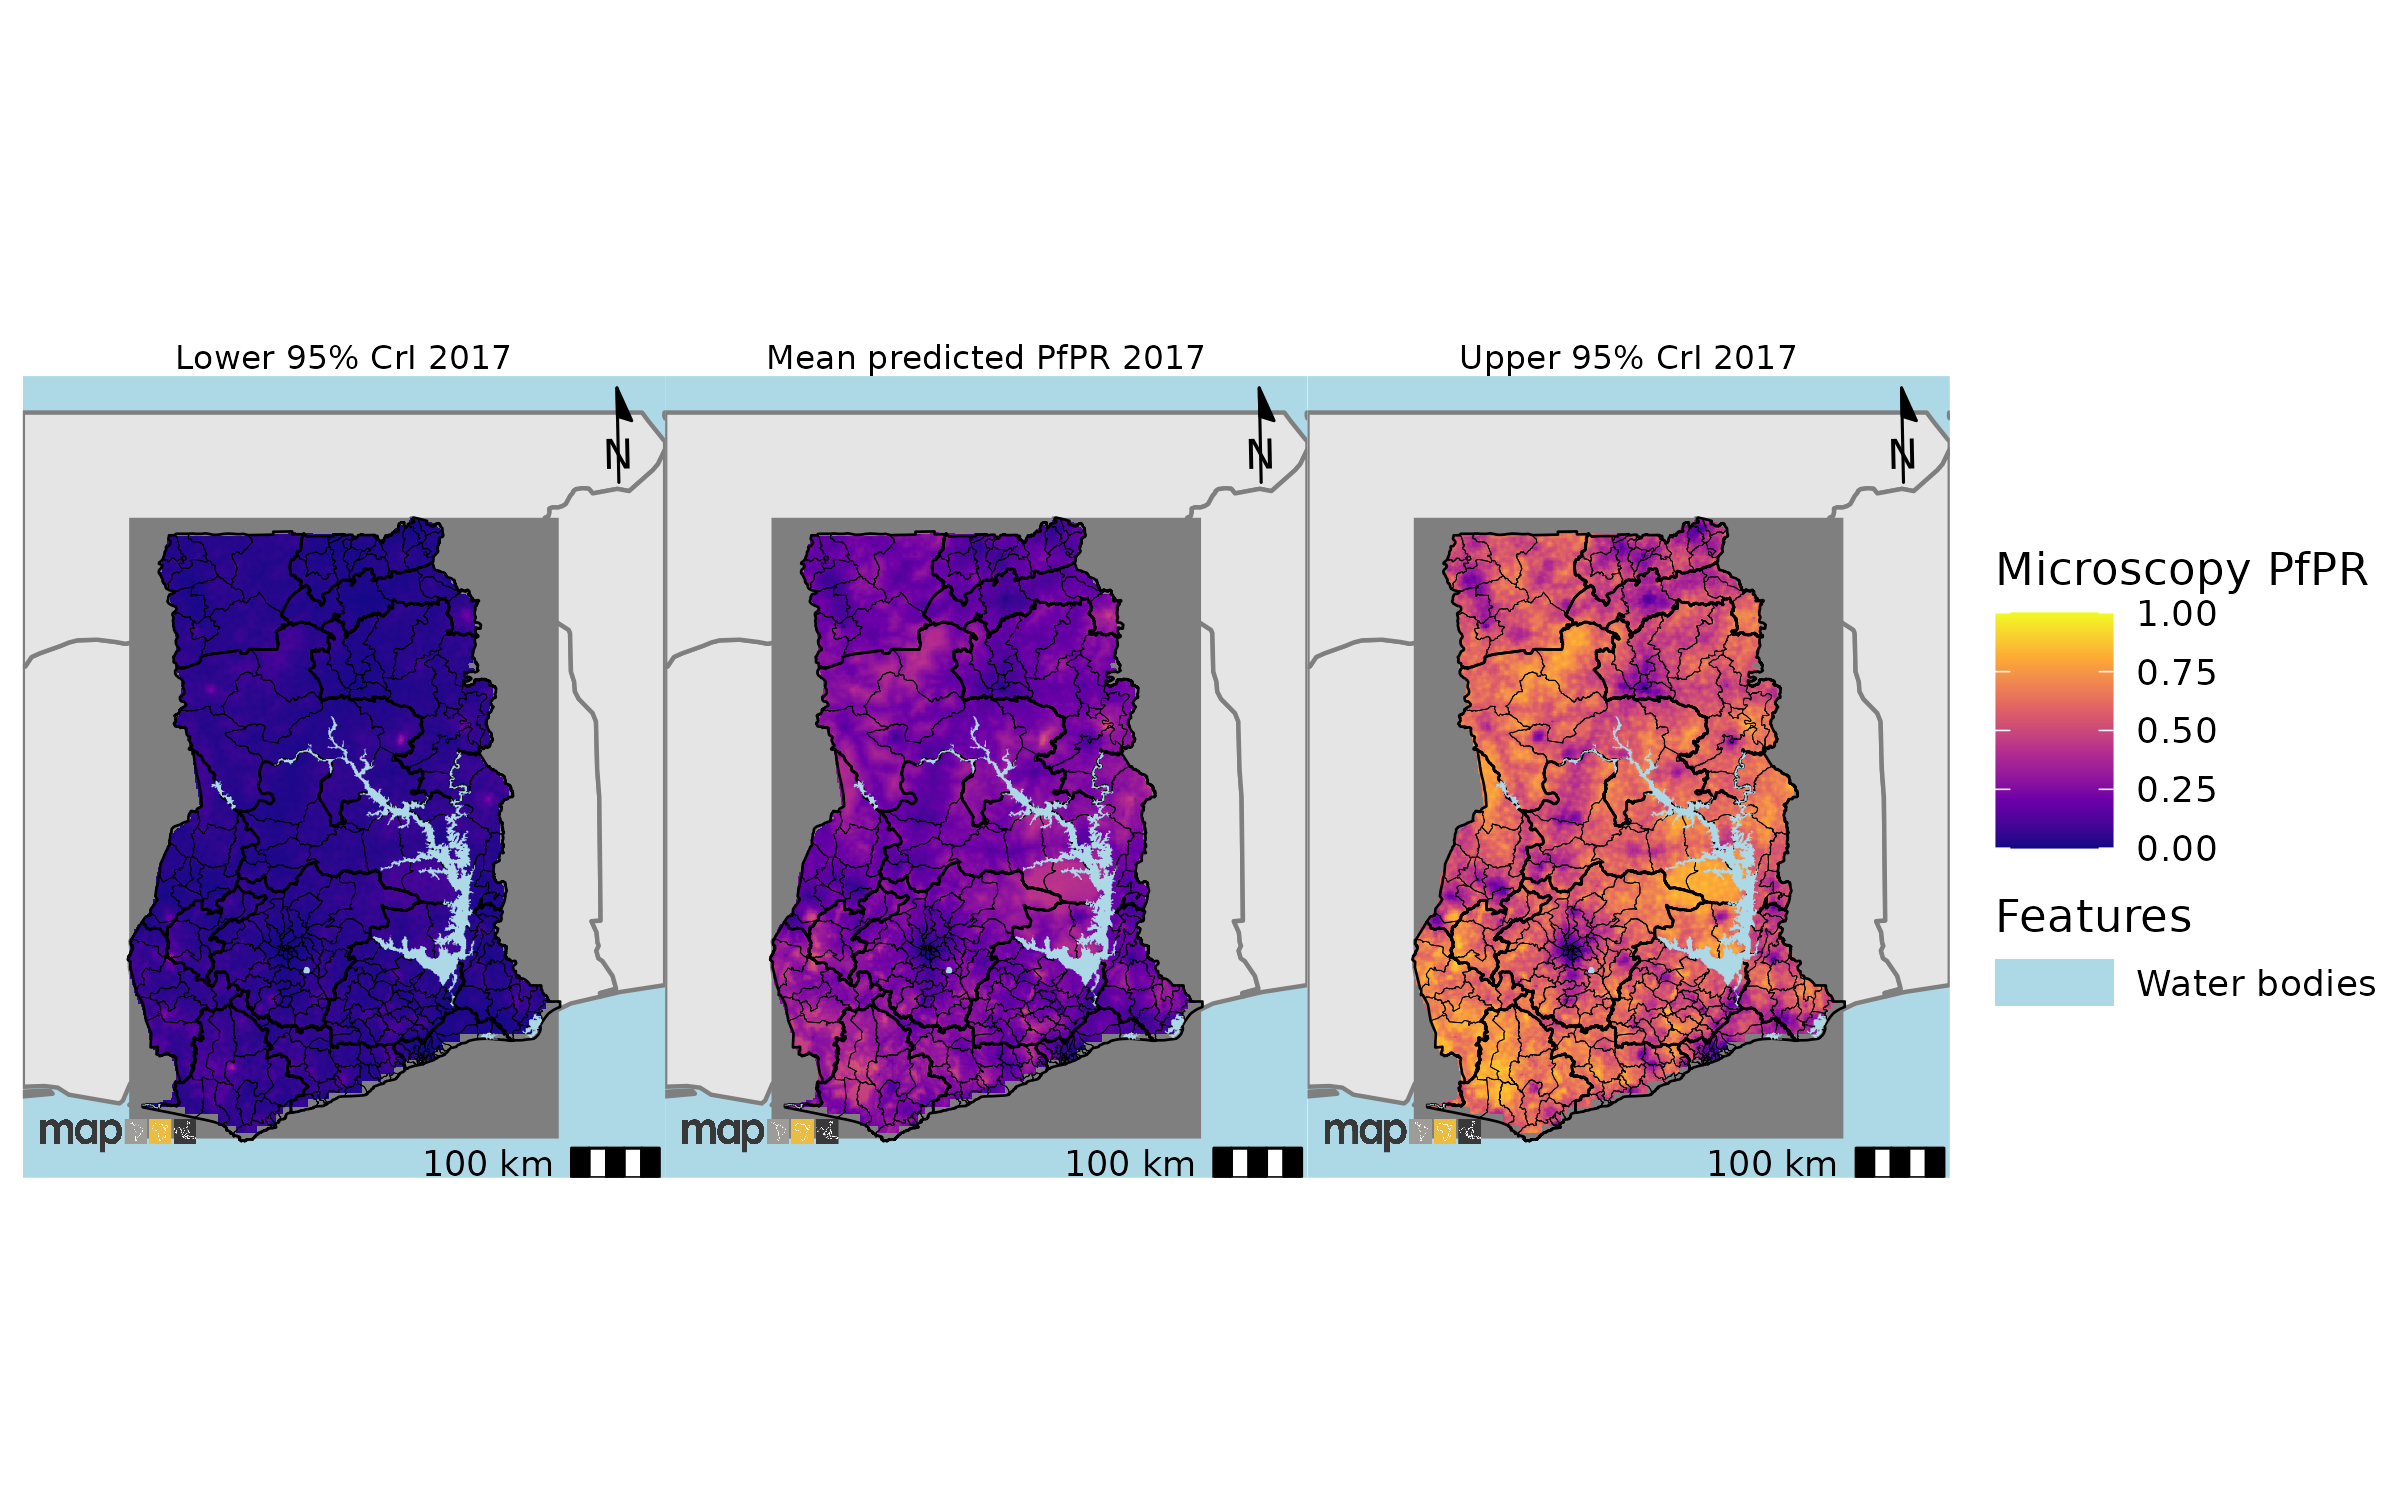 |
| 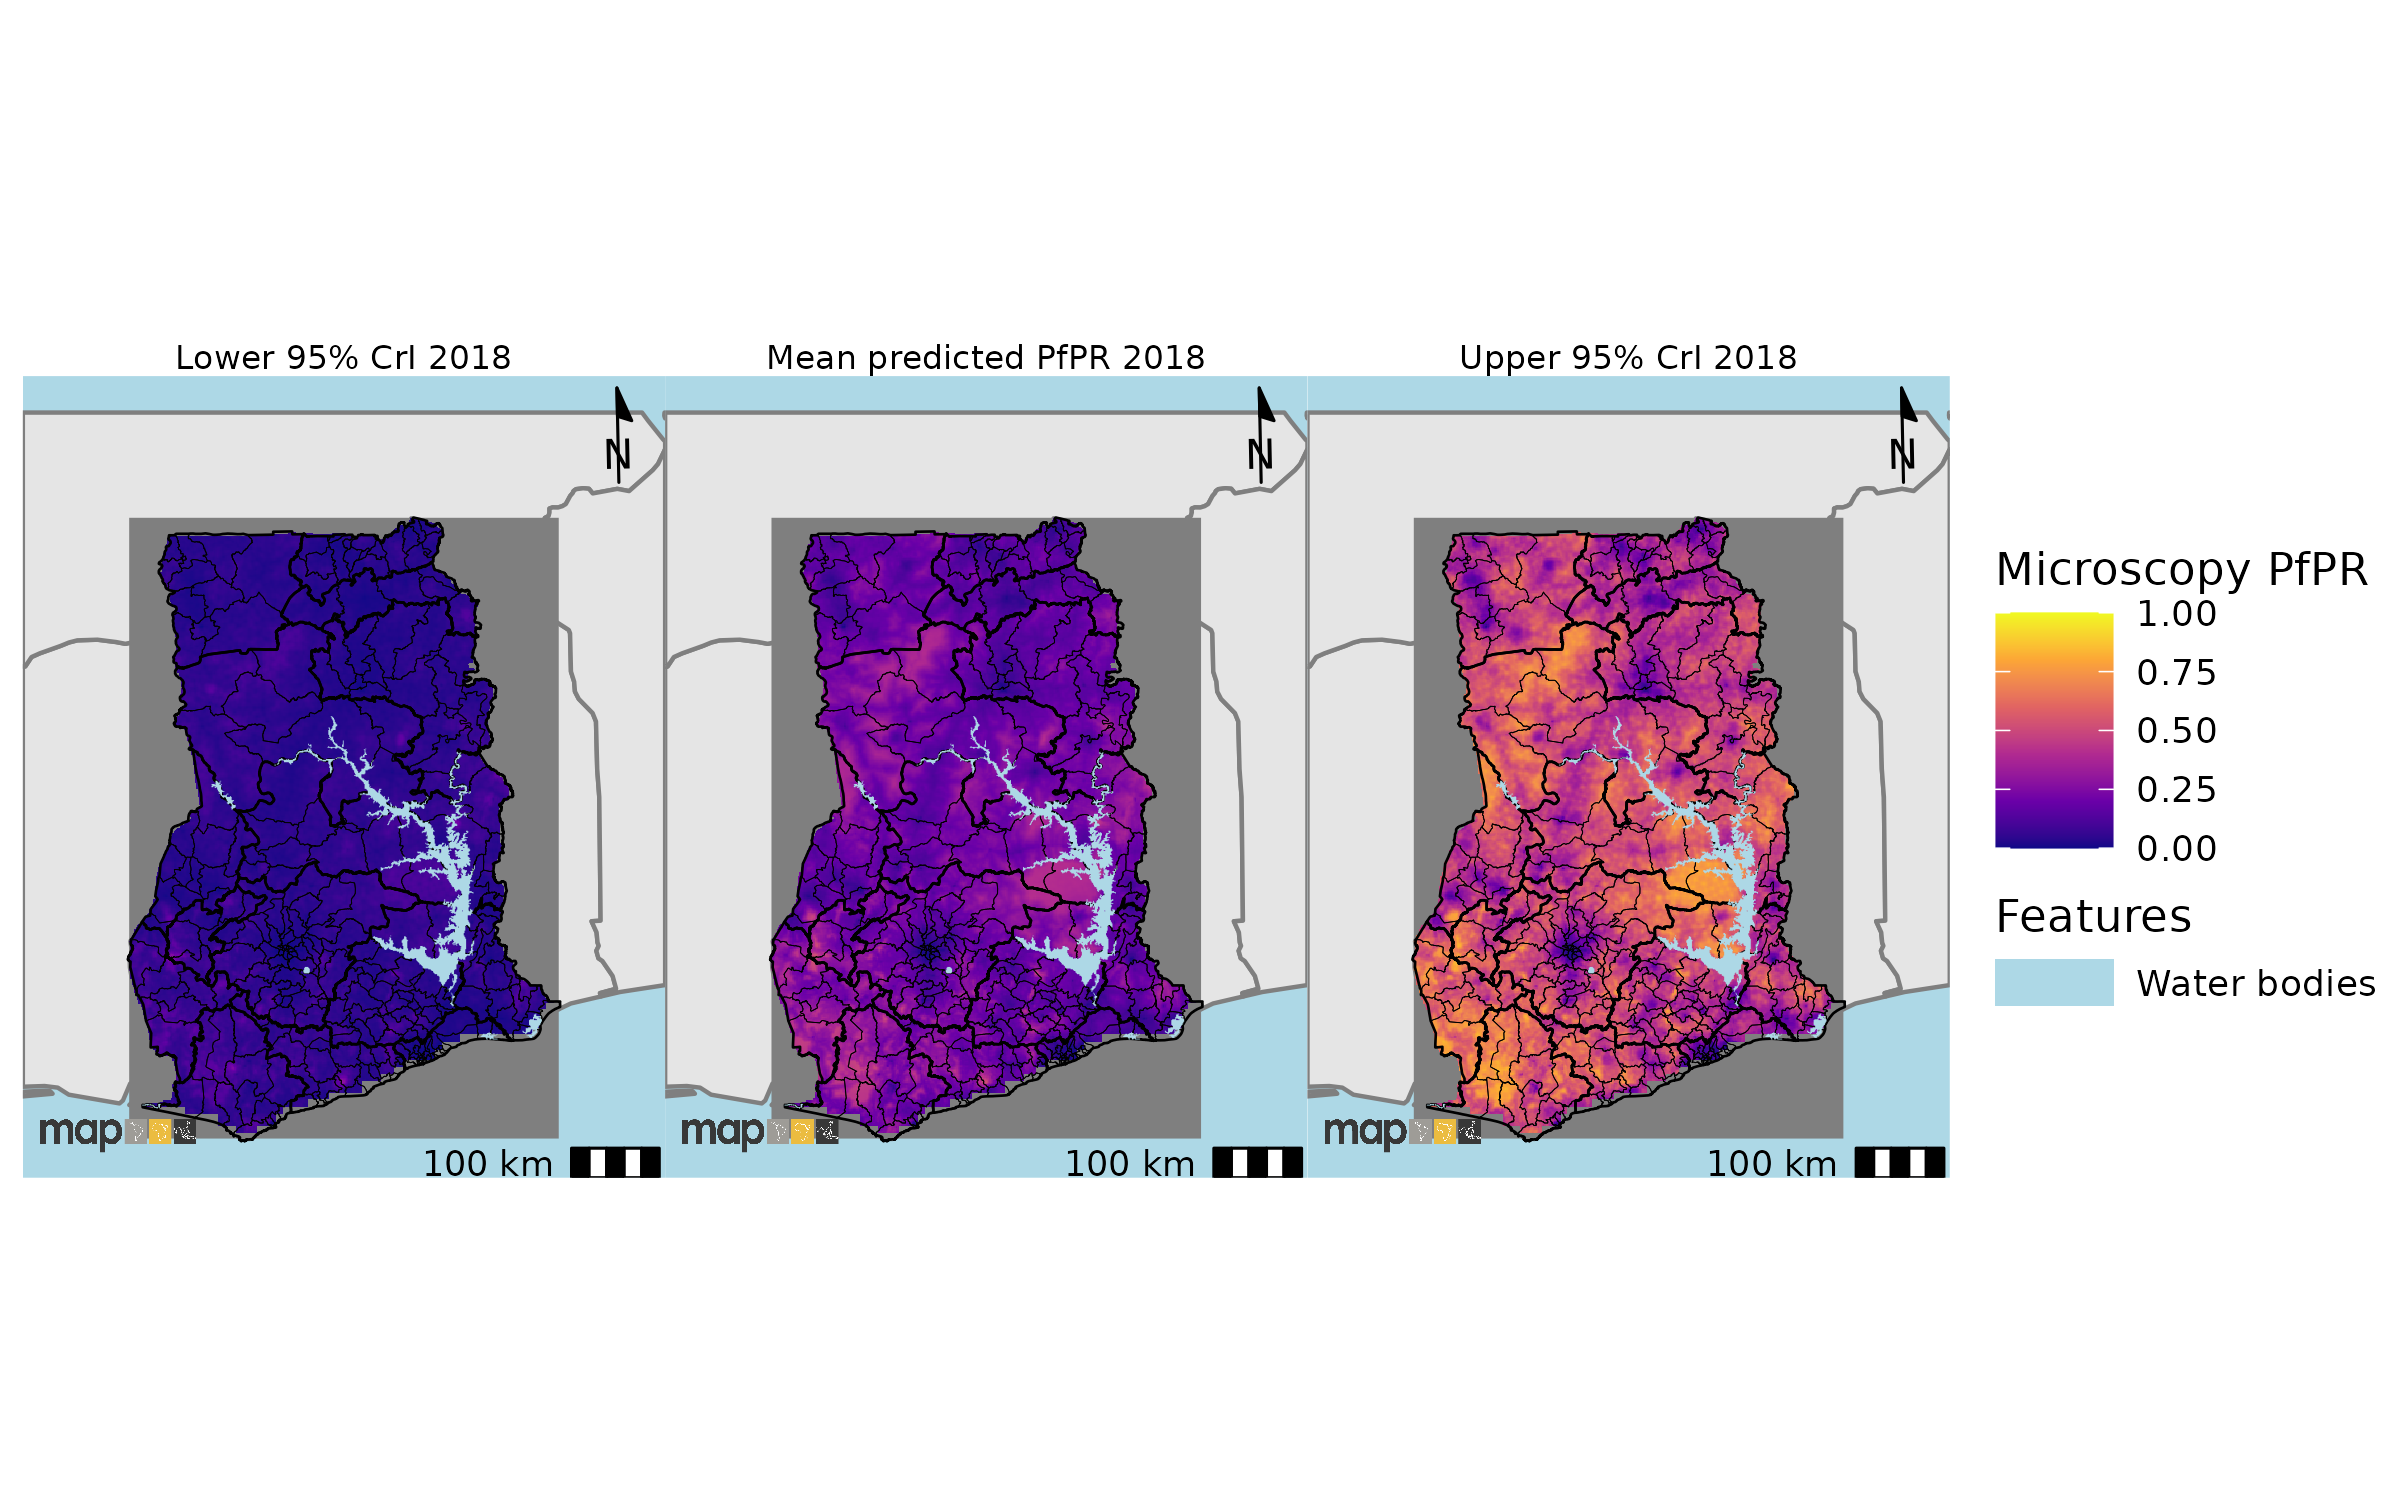 |
| 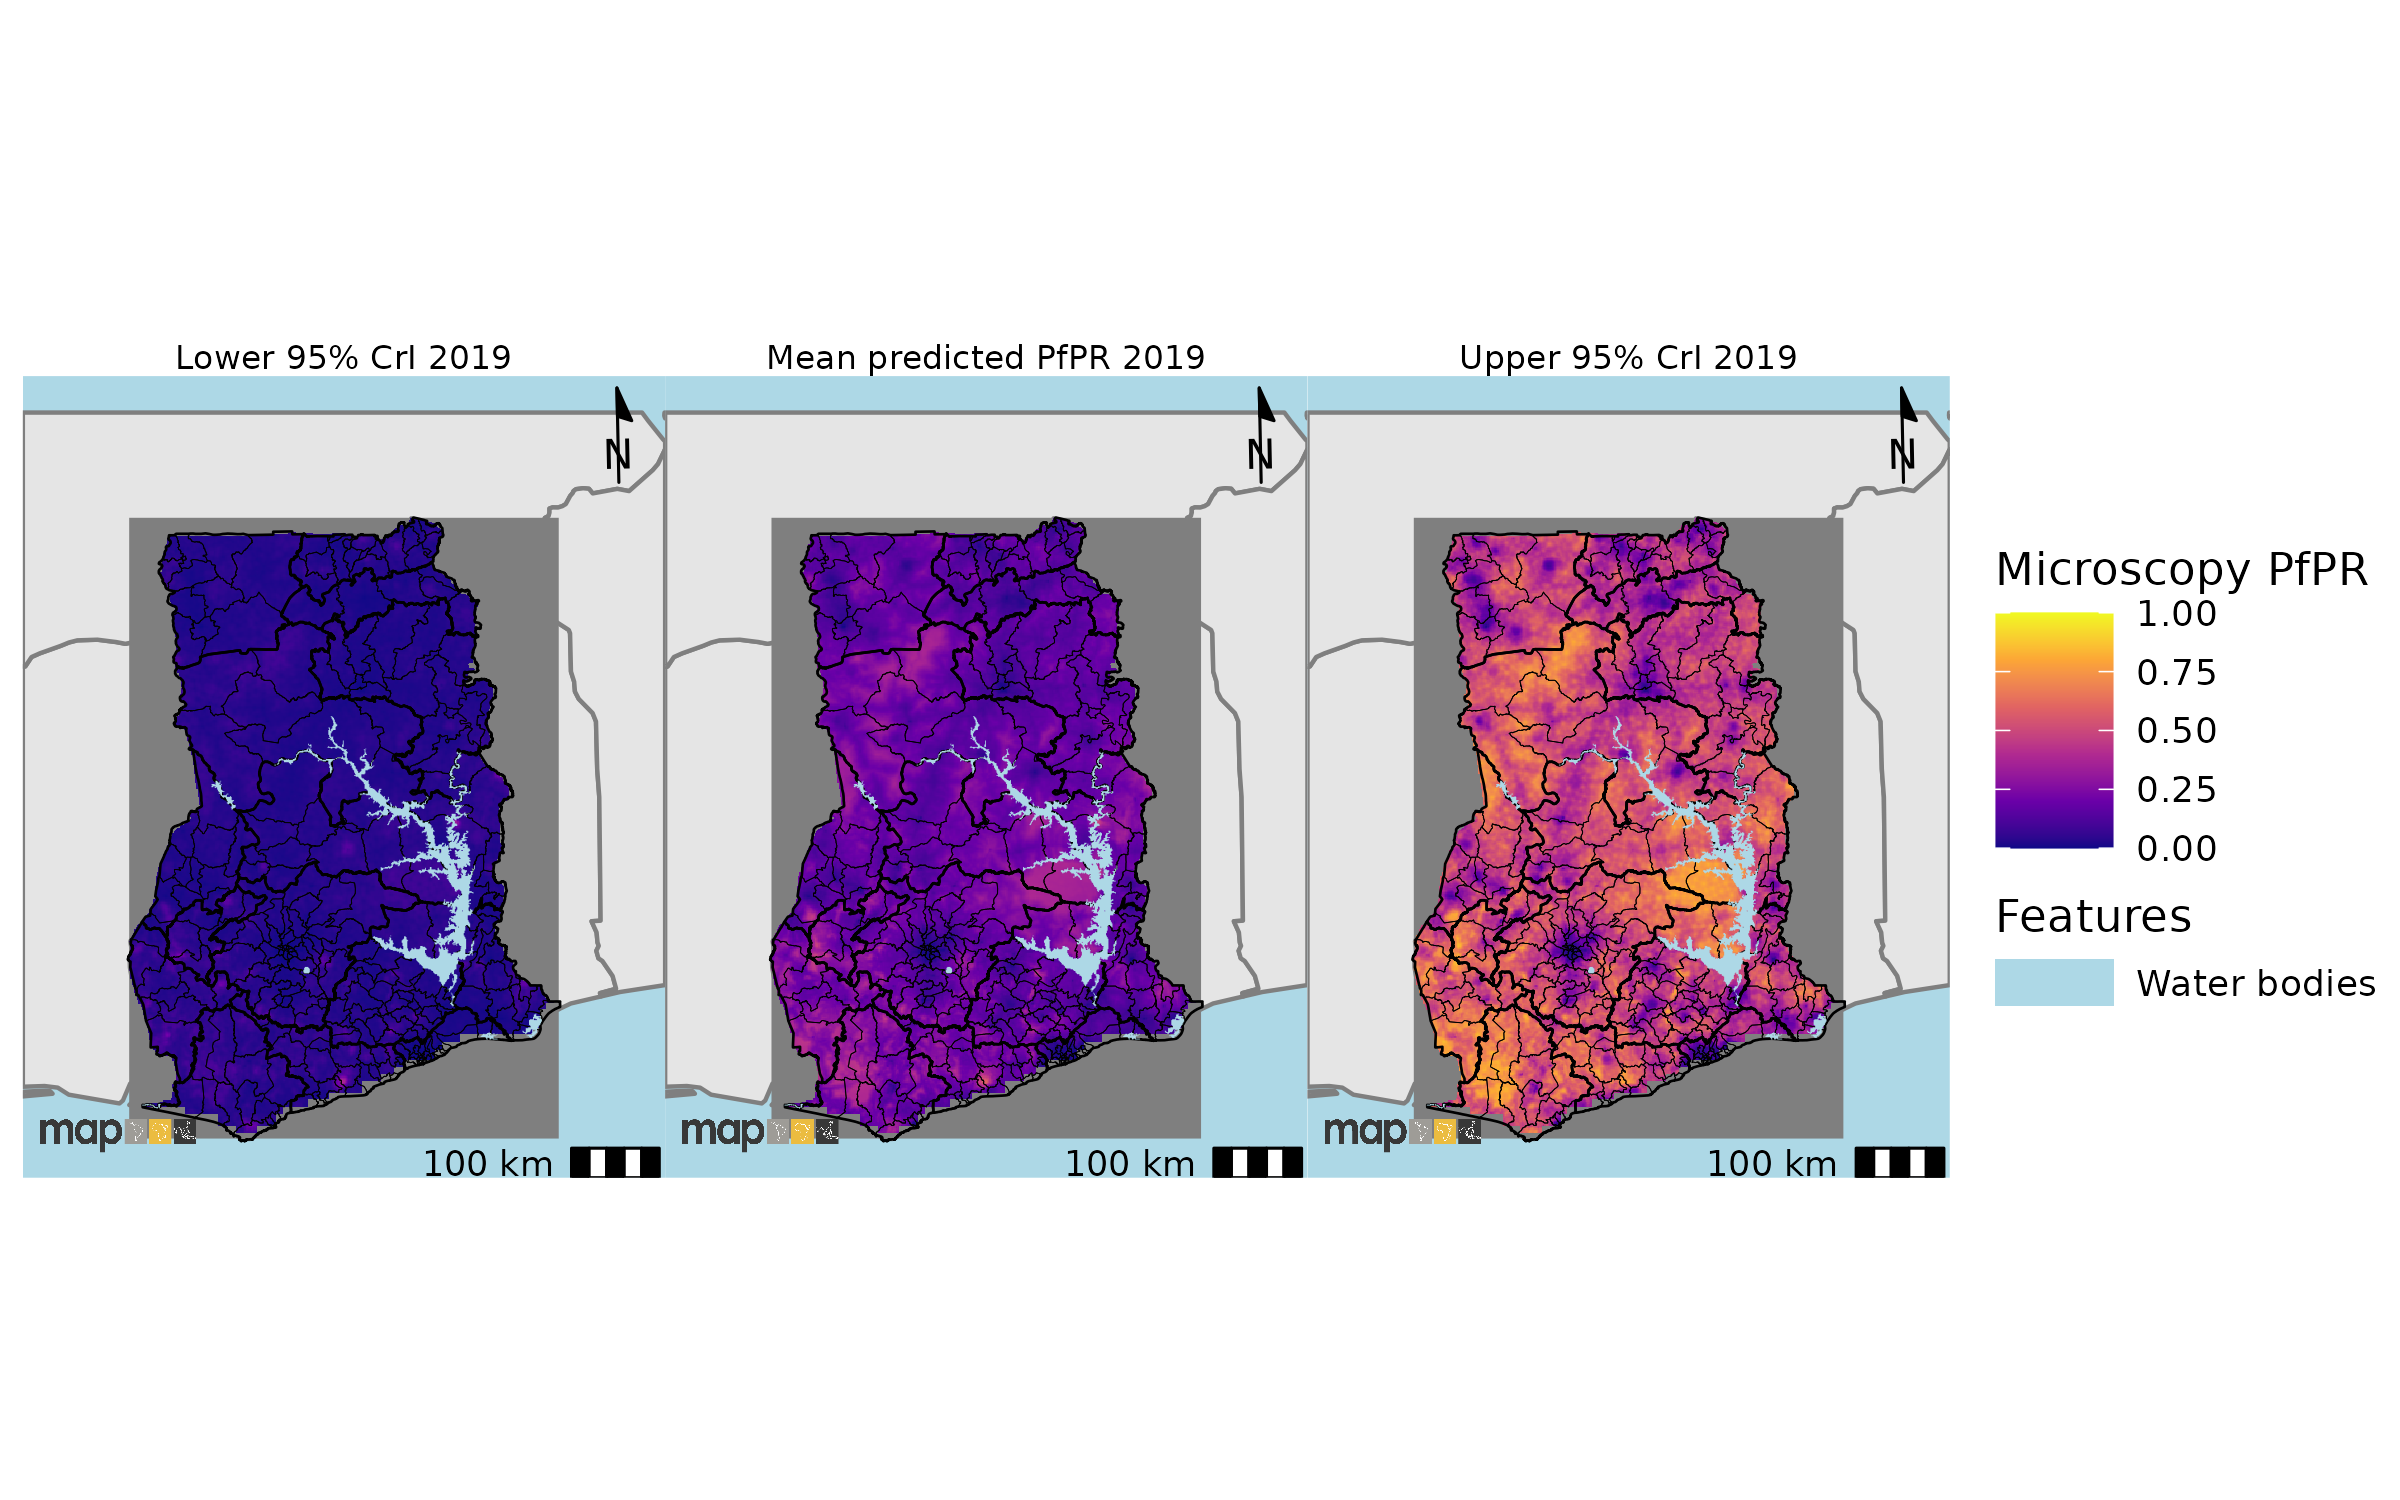 |
| 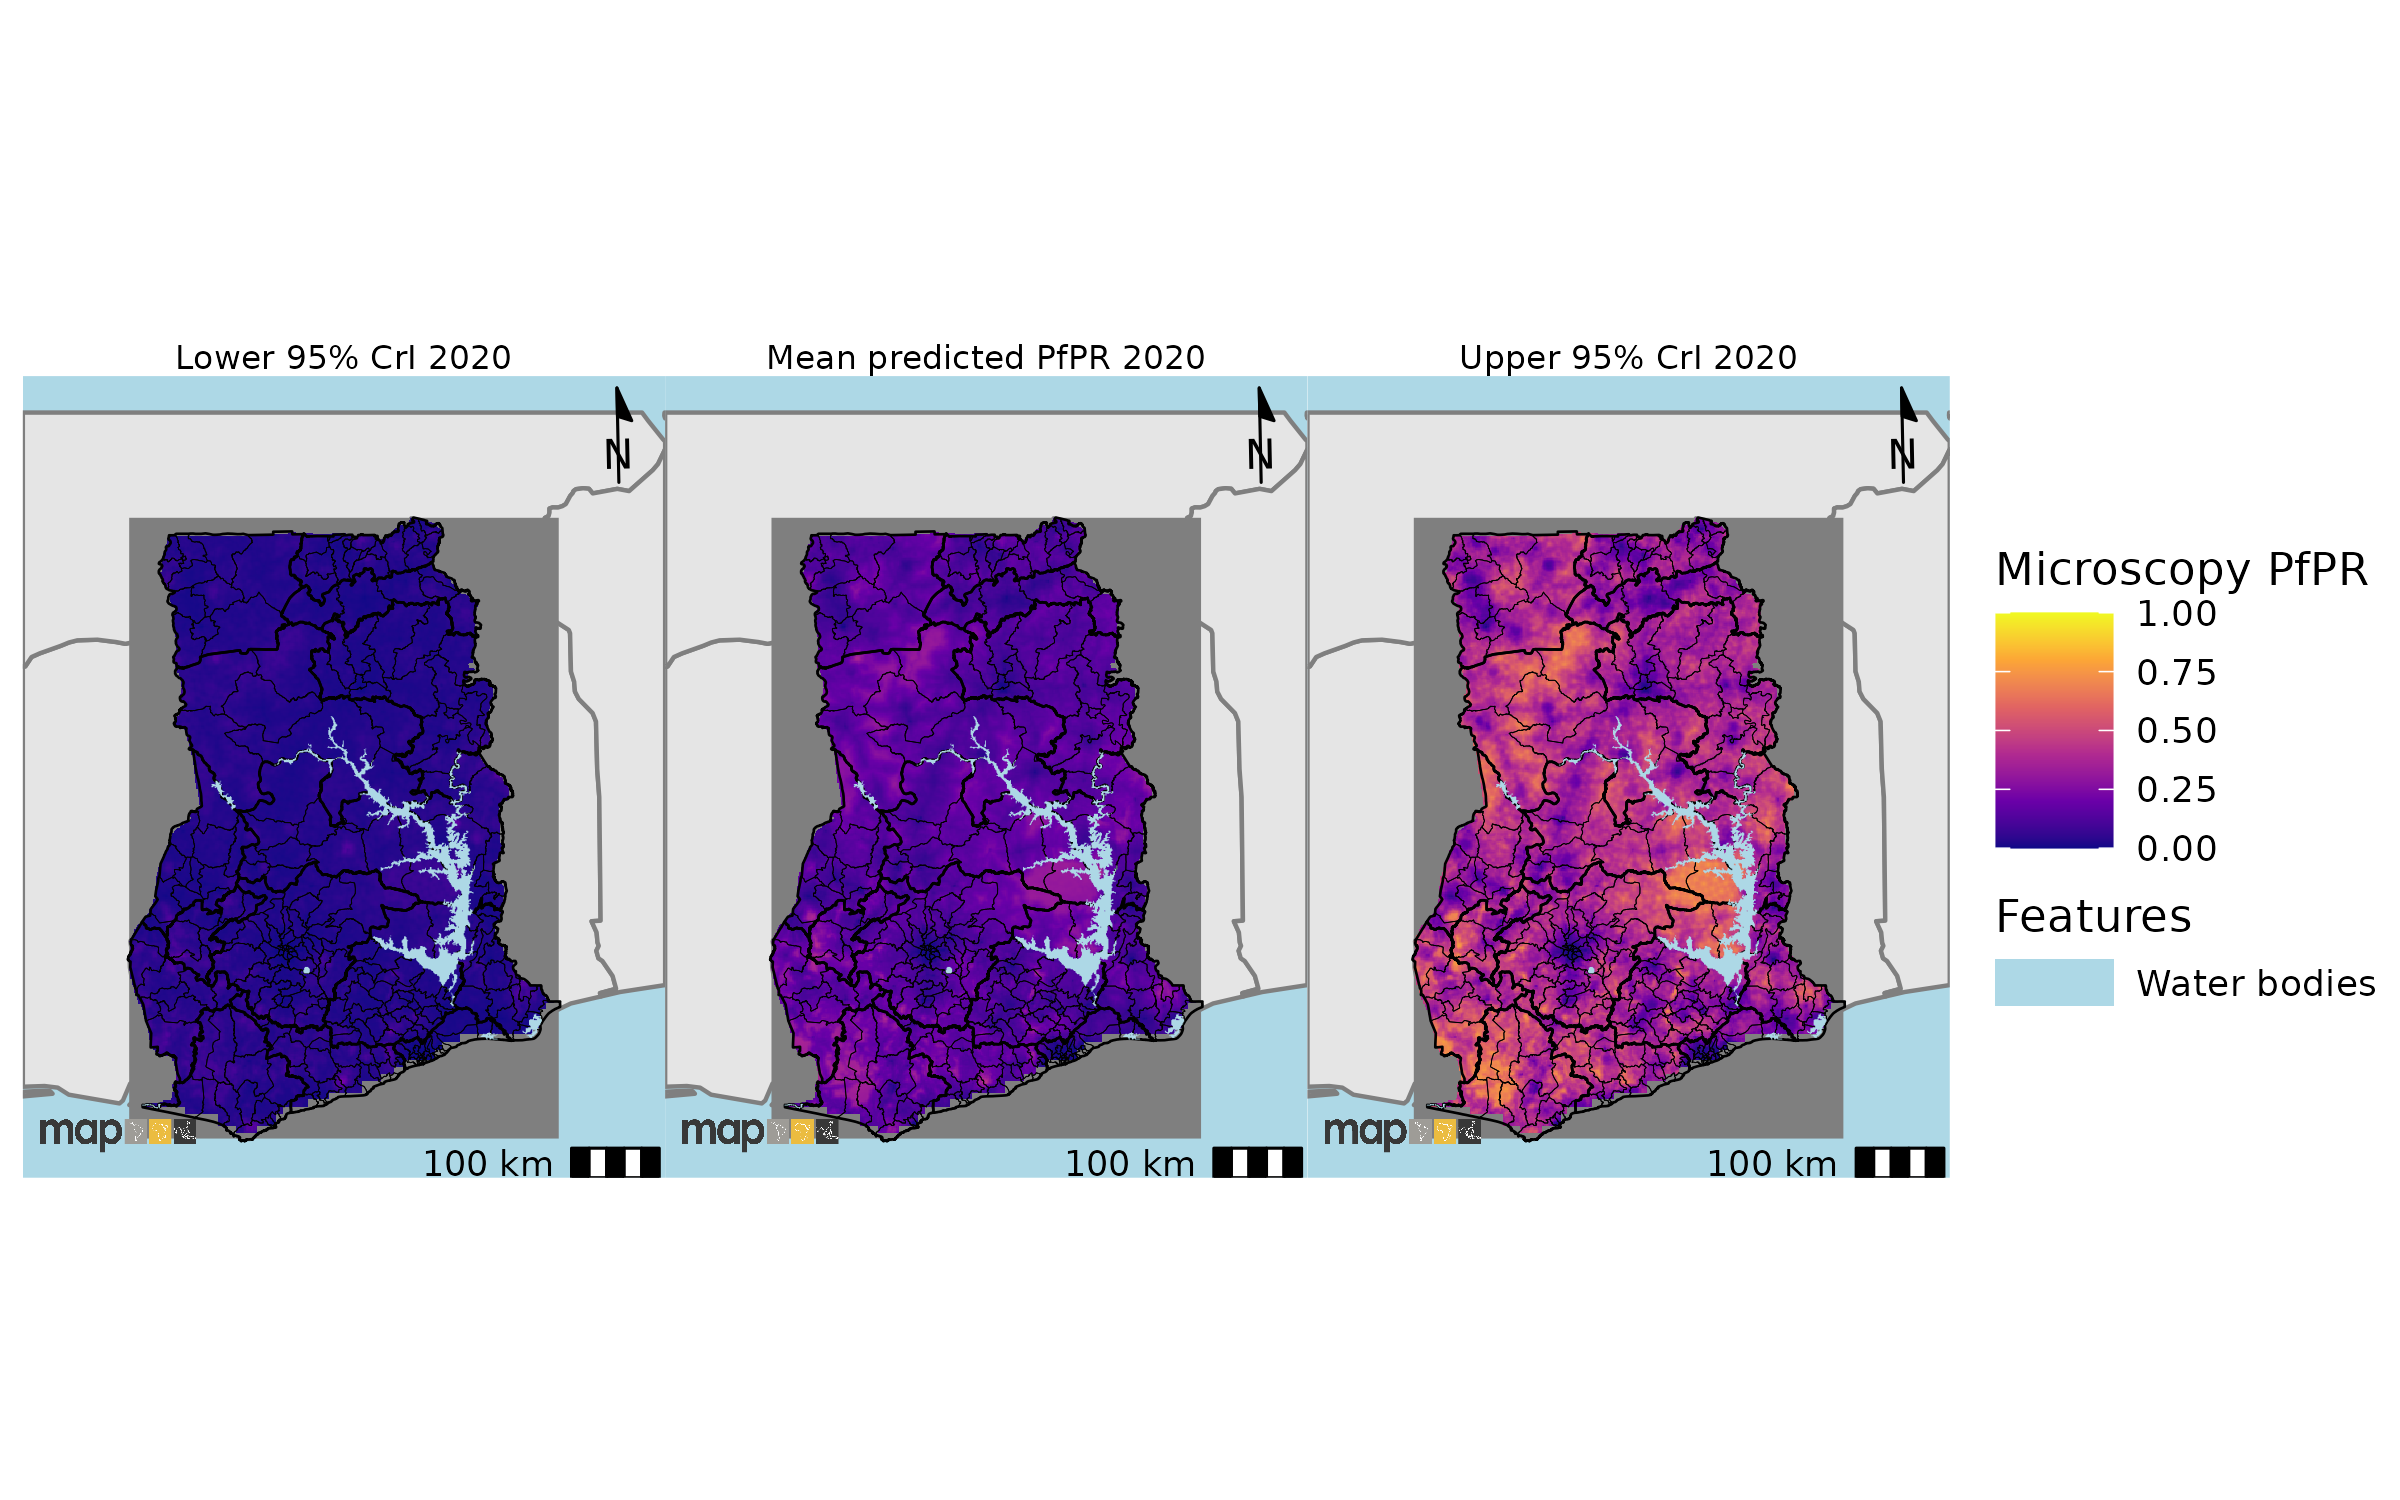 |
| 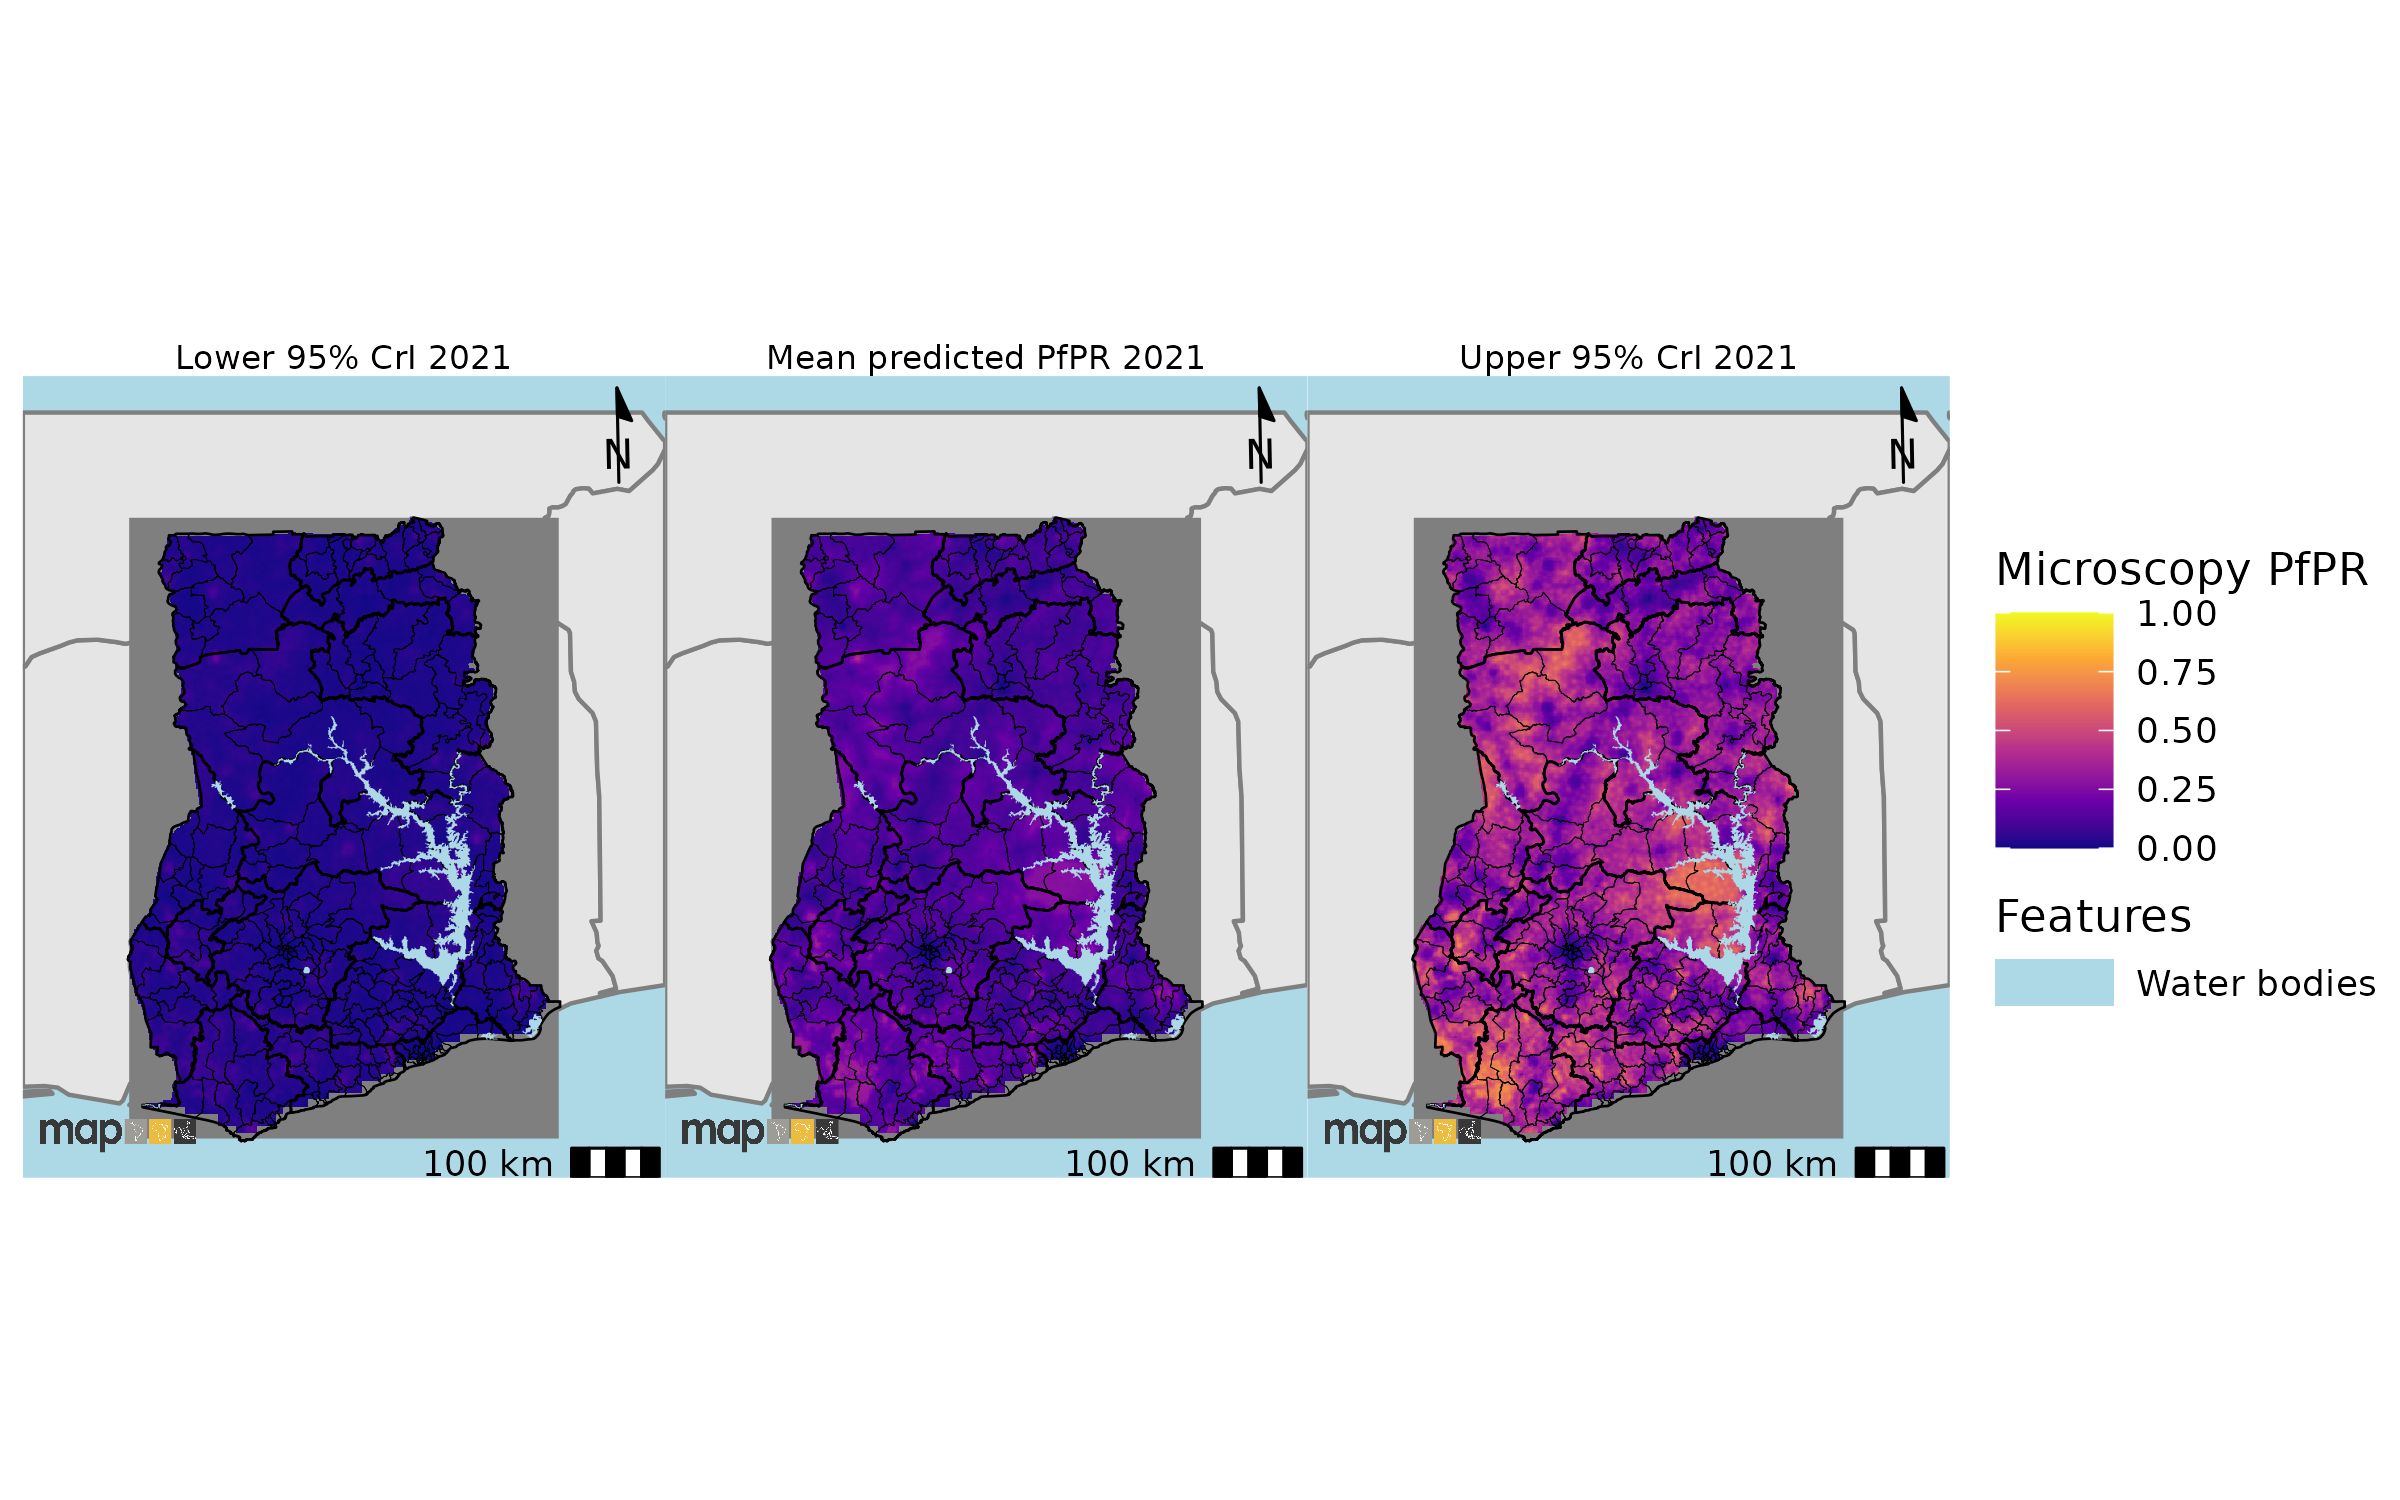 |
| 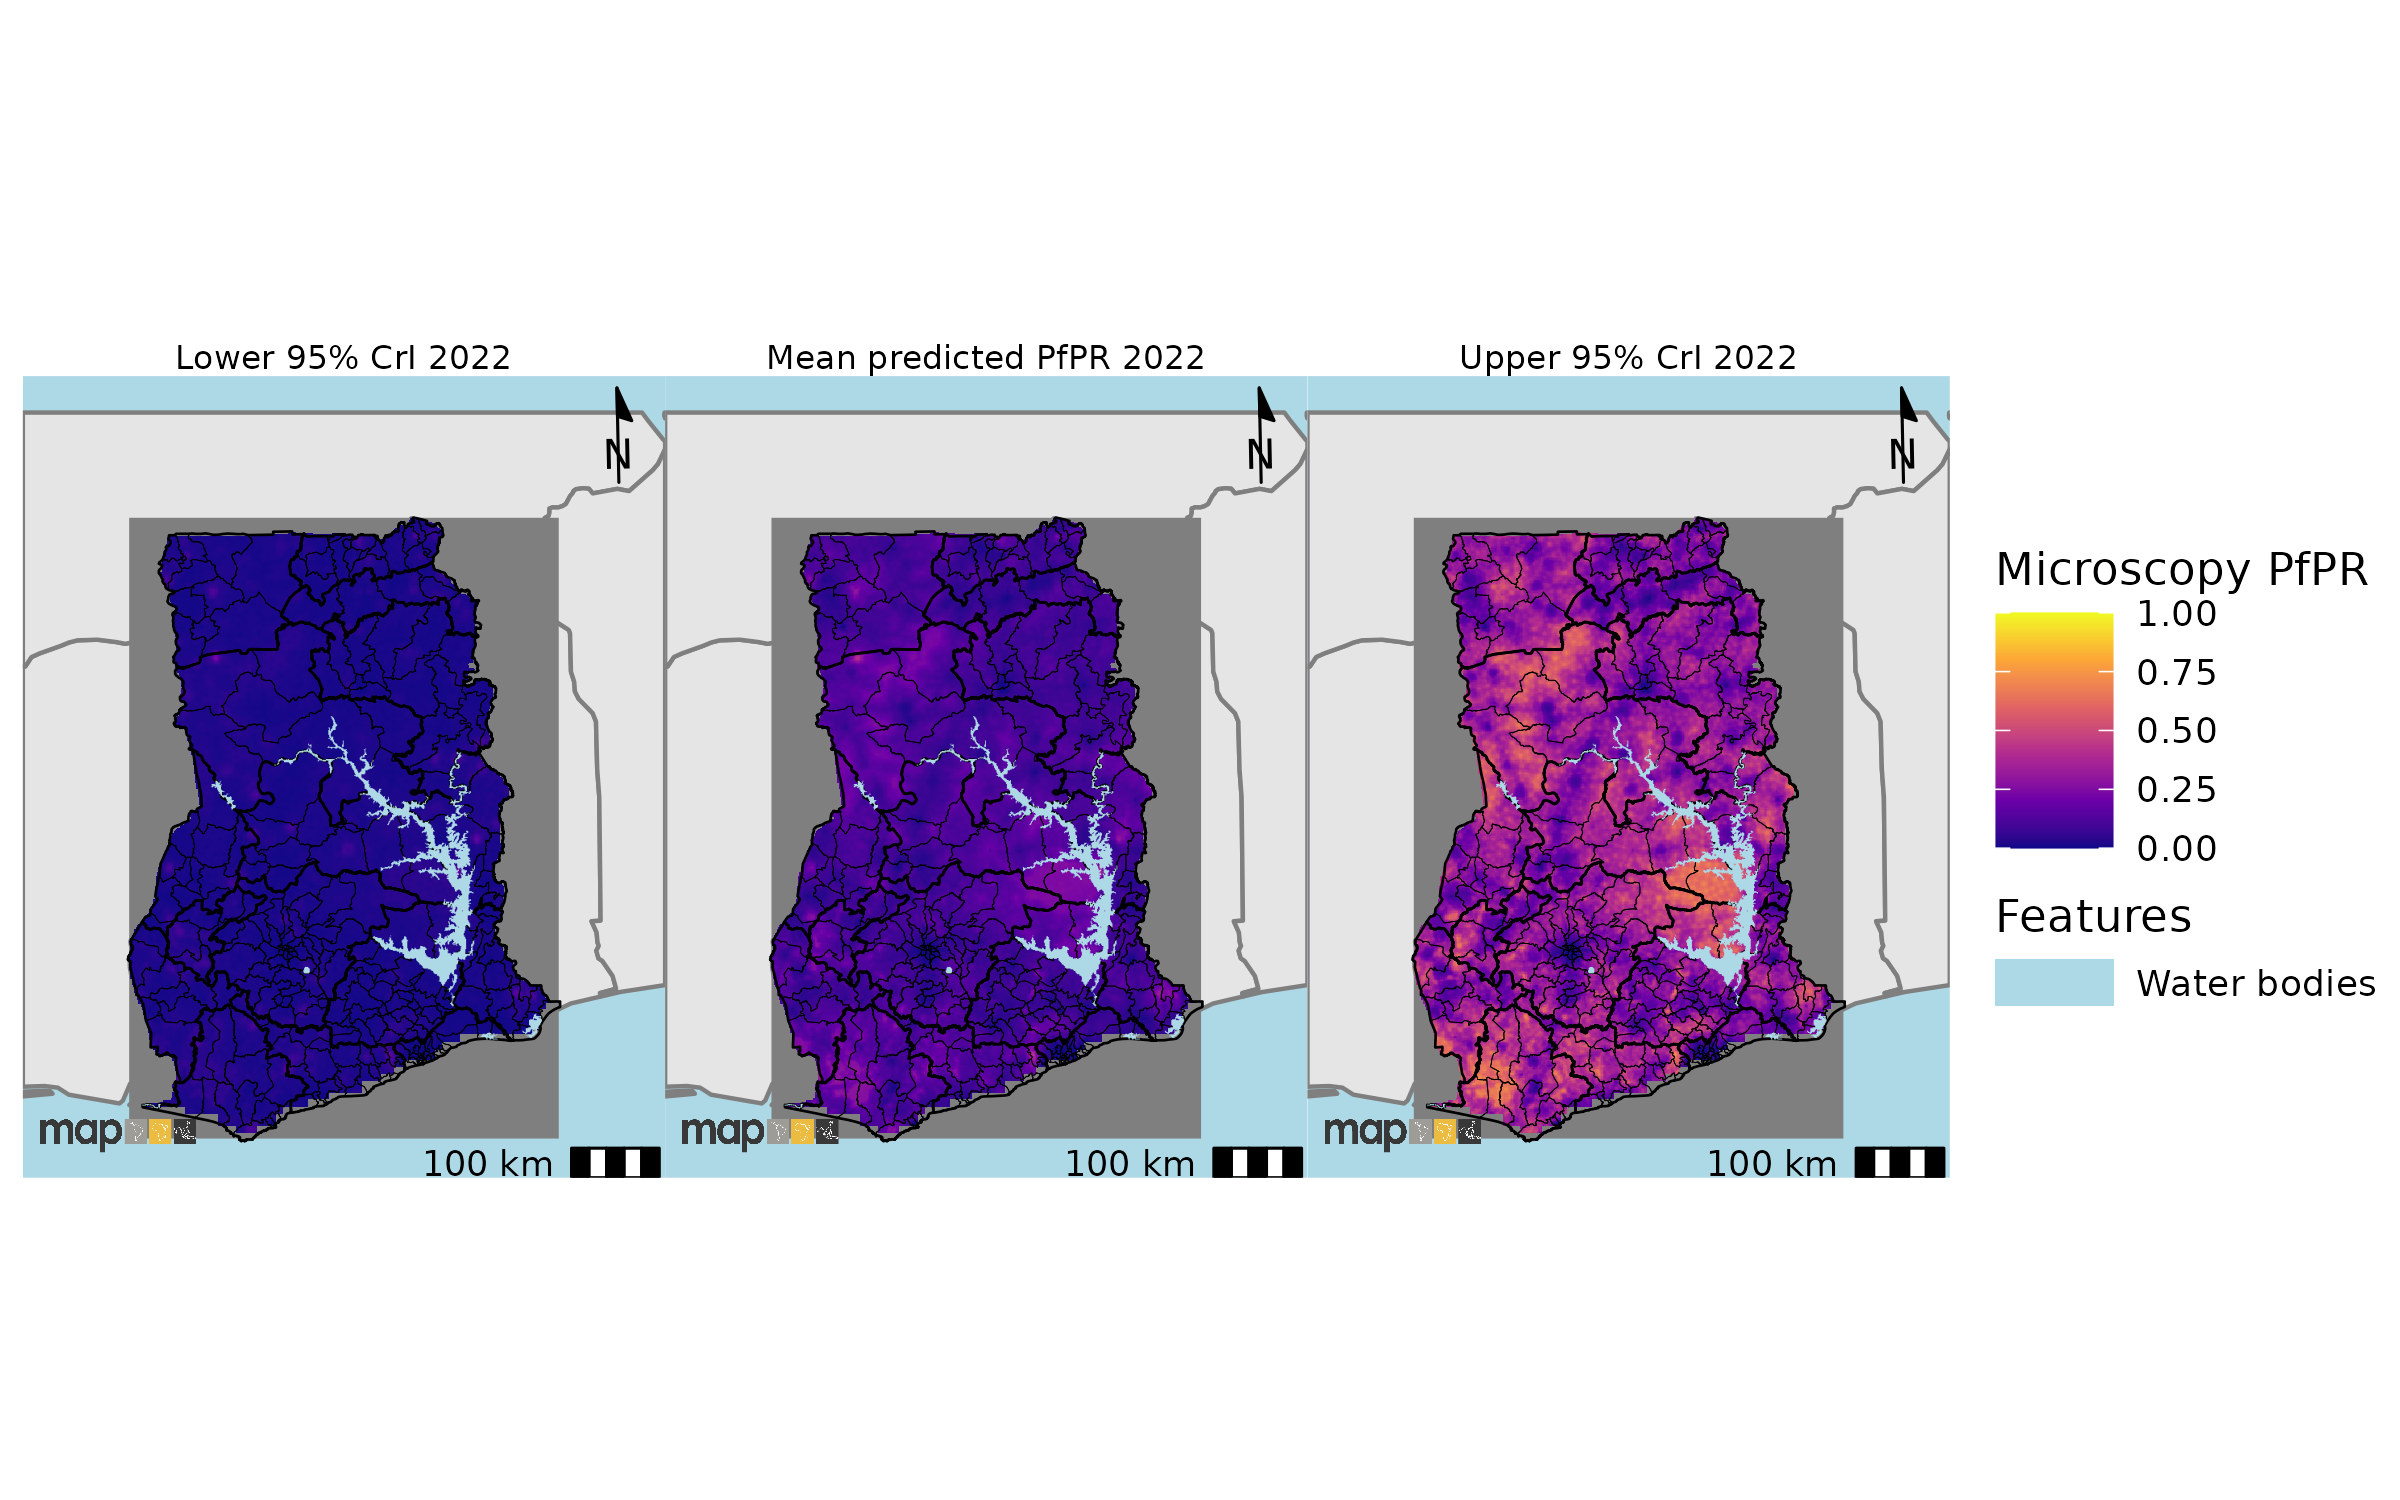 |
| 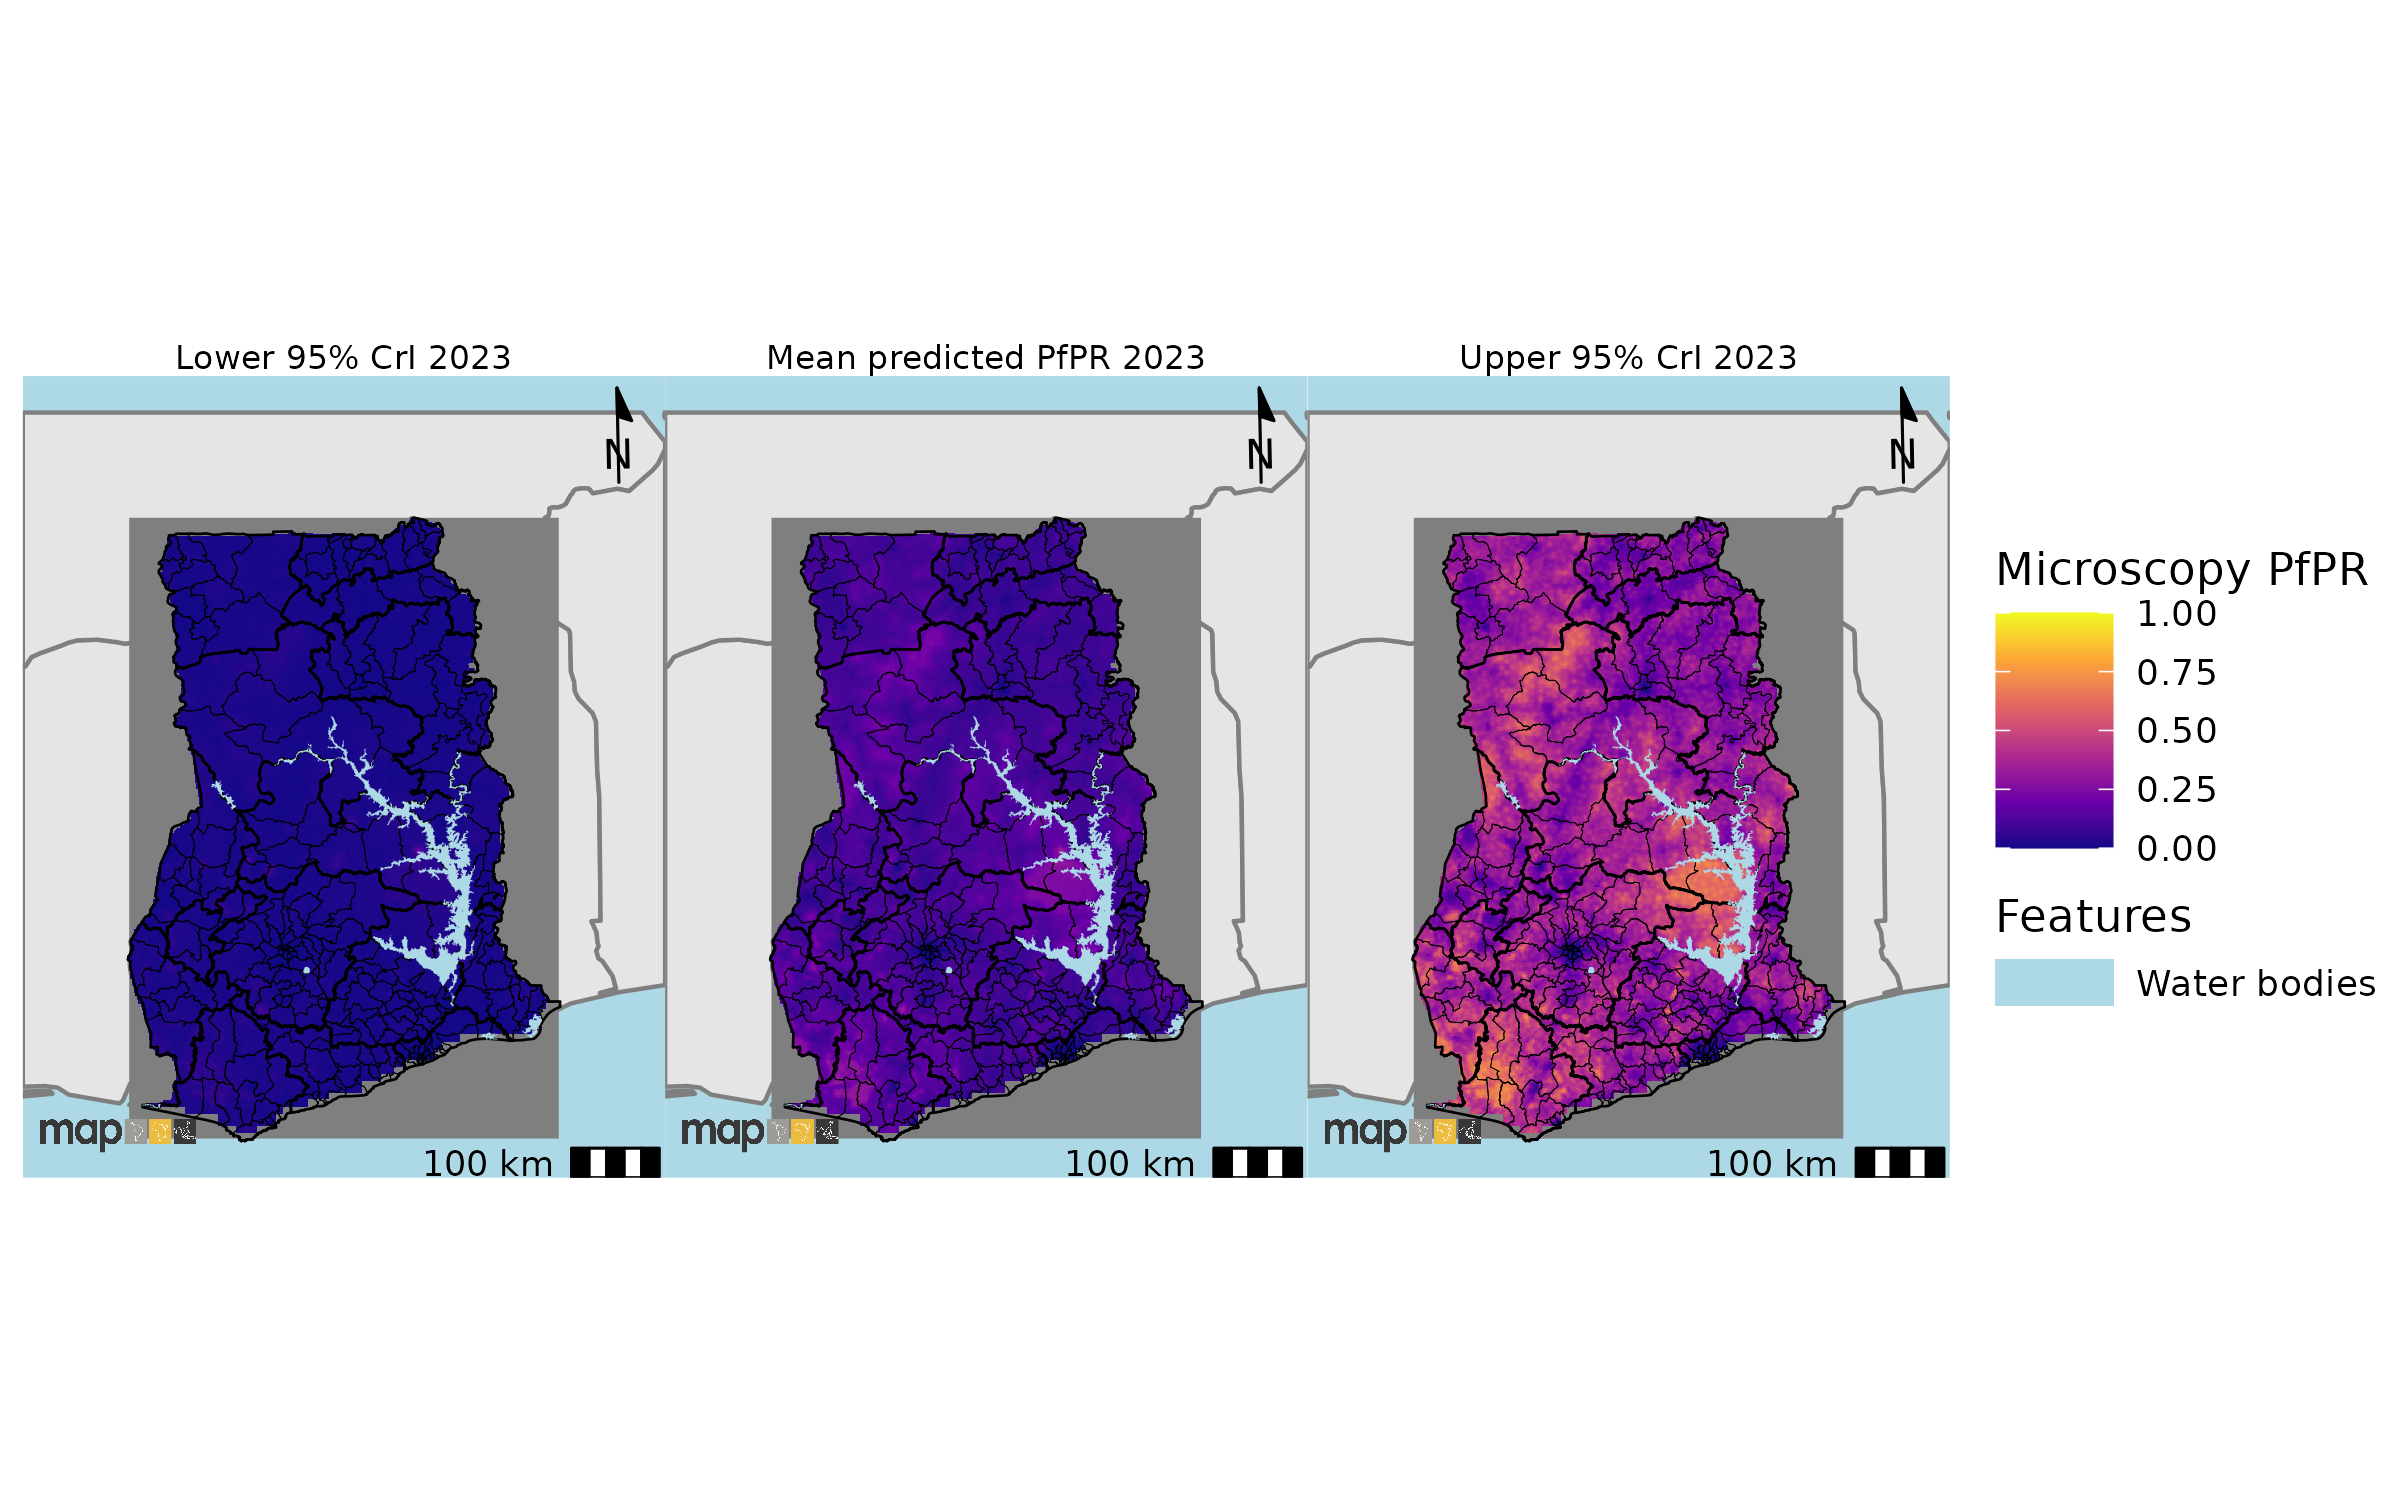 |
| 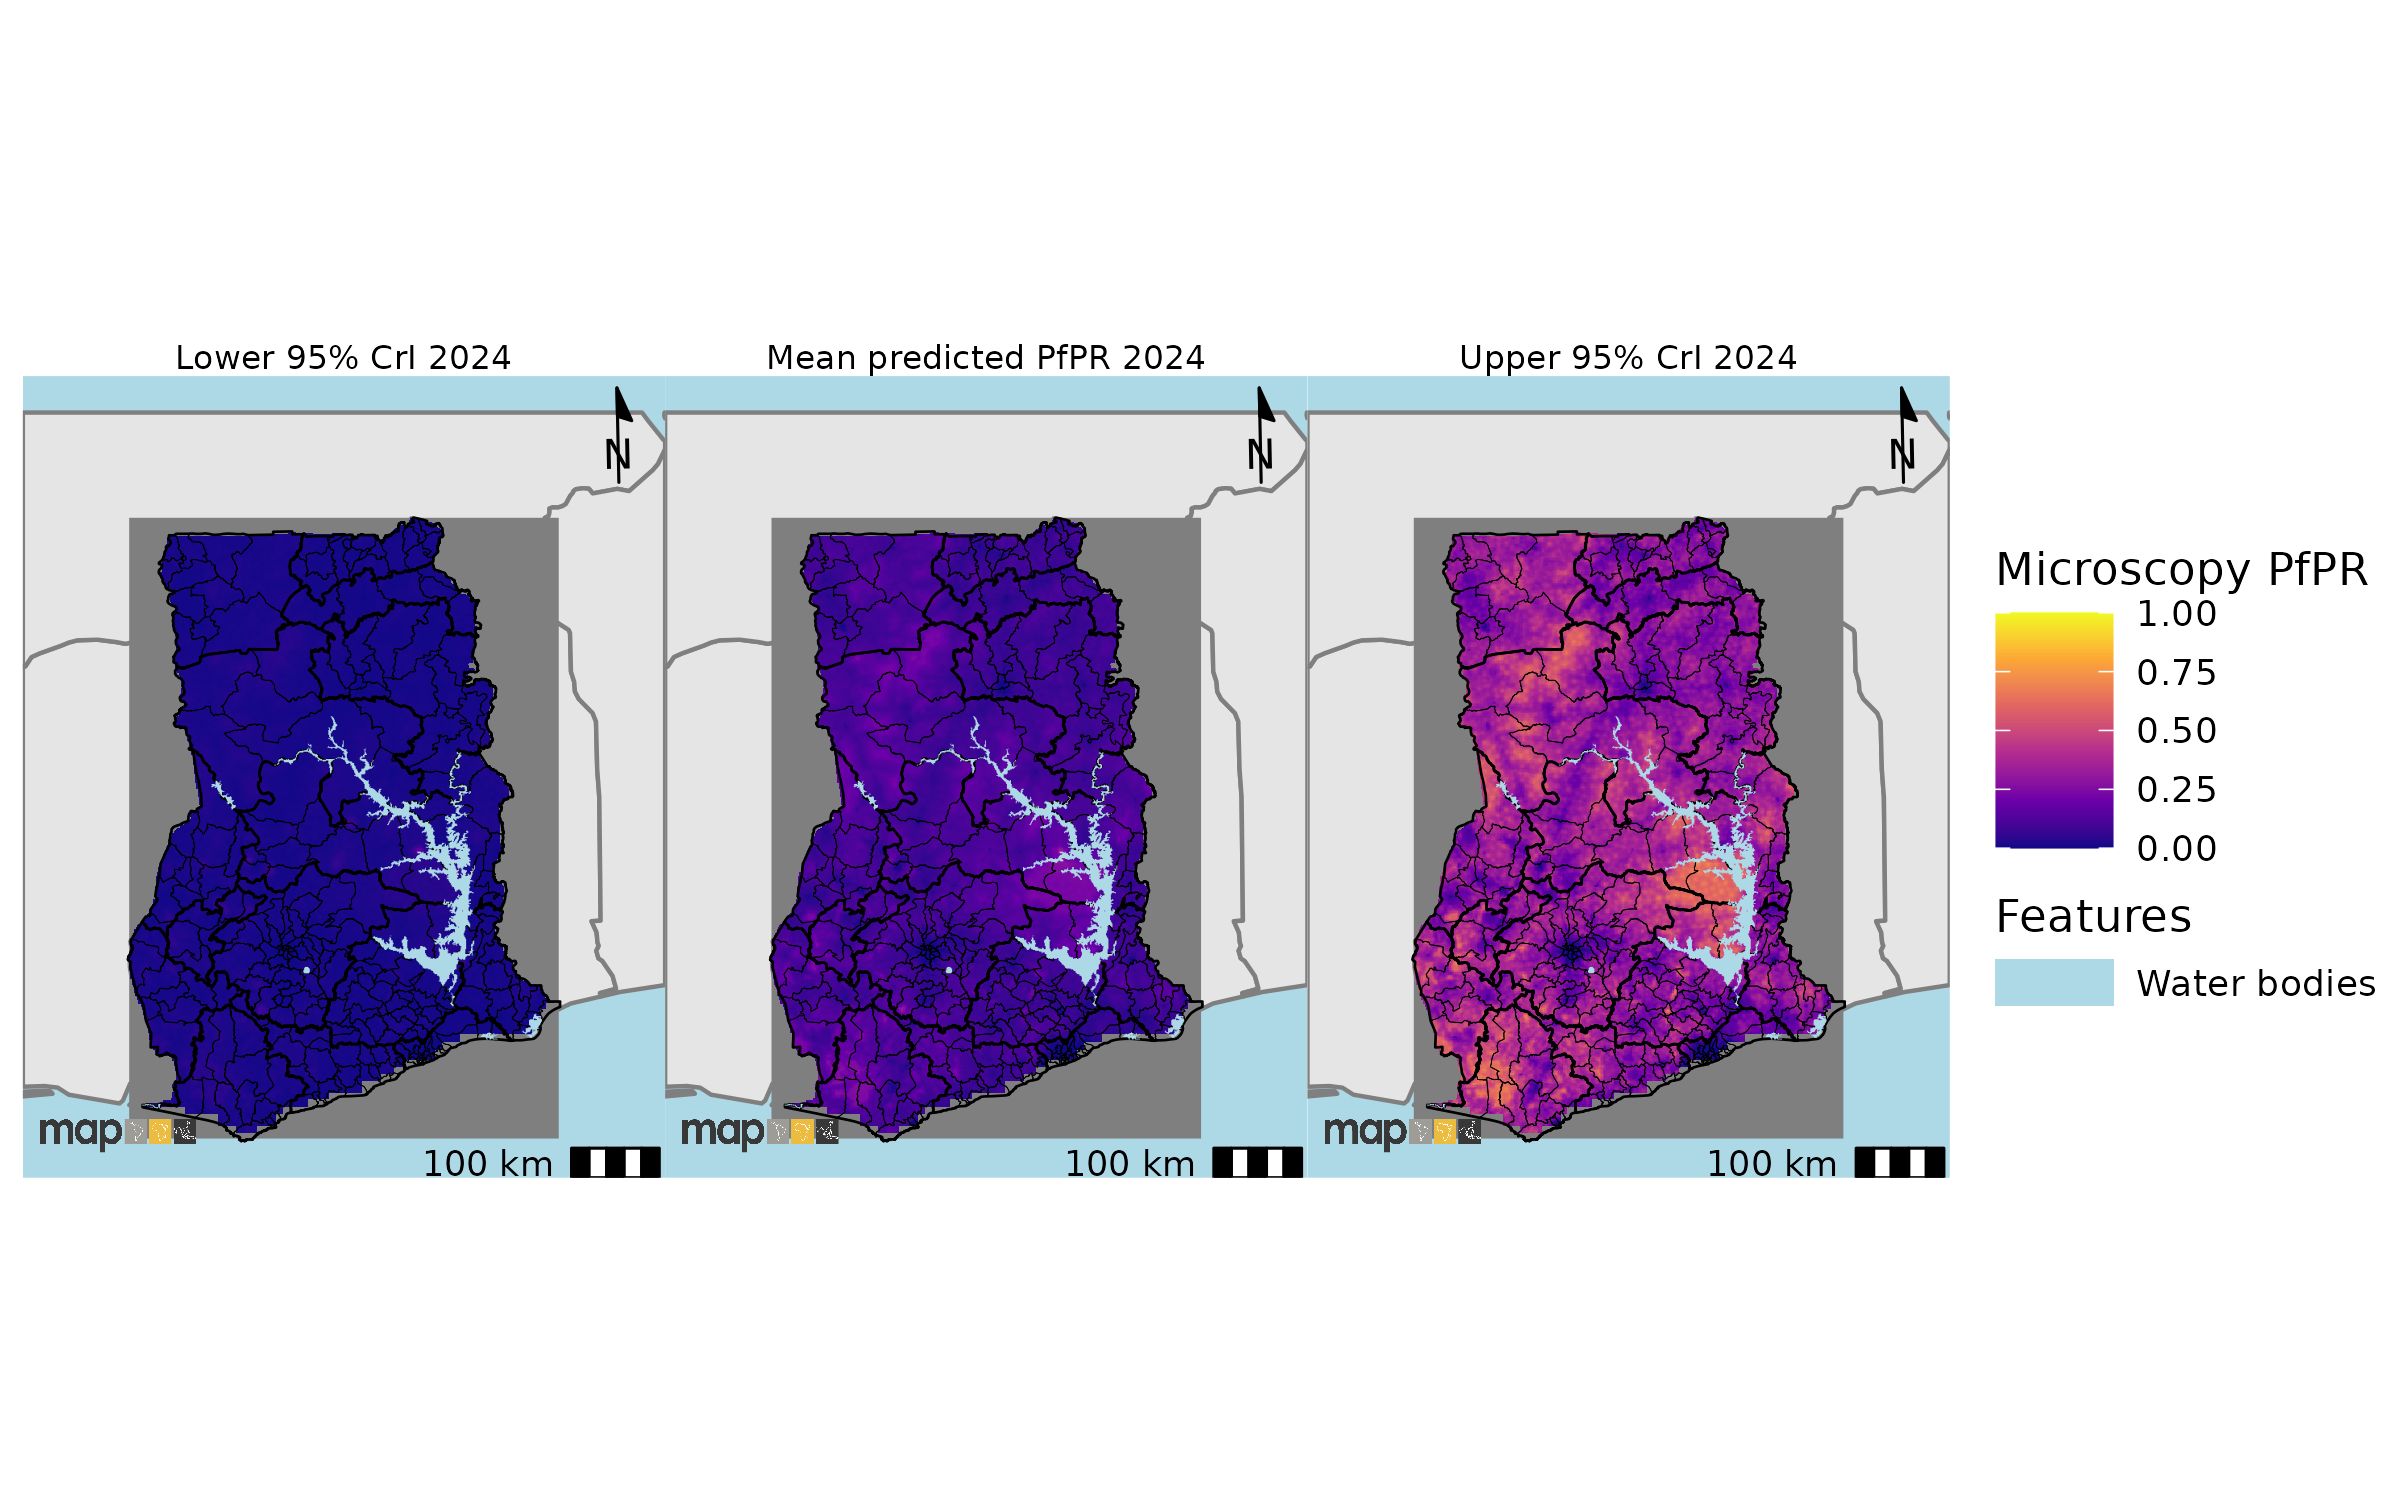 |
| 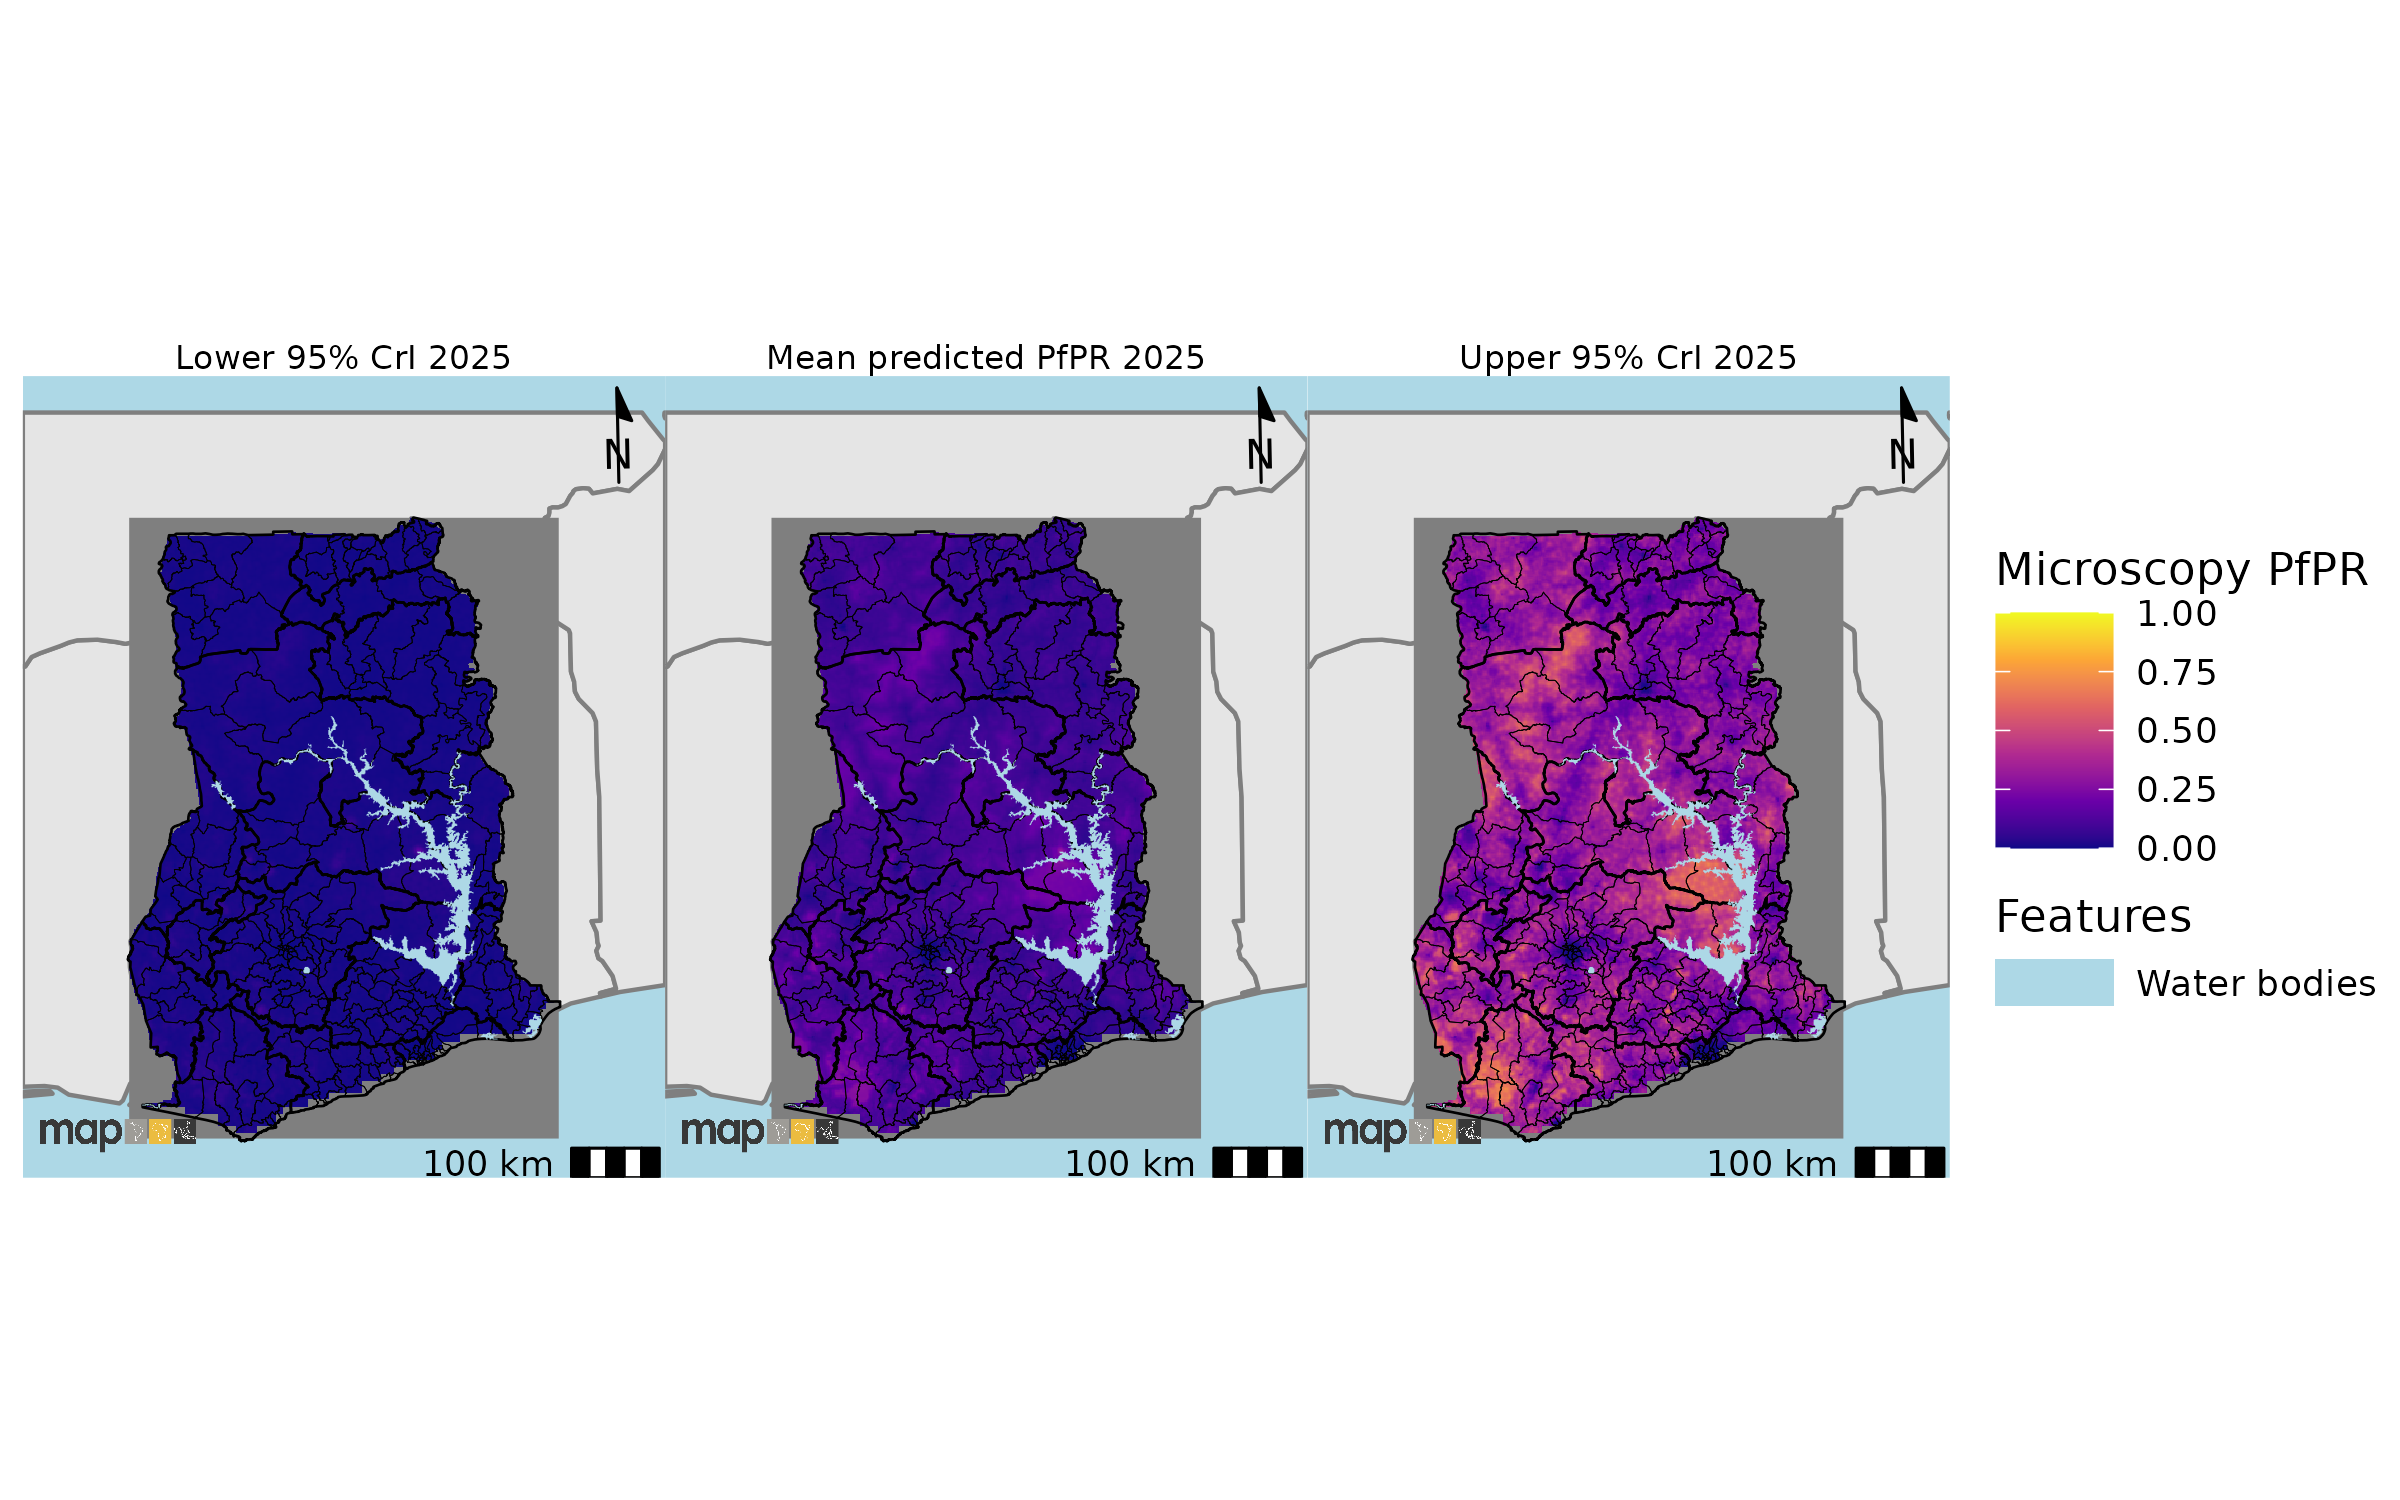  Supplementary figure 11: Prediction maps of P. falciparum malaria by microscopy for Ghana from 2011 to 2025. There was general decline in malaria prevalence across the years. Few areas in the Western and Eastern region (close to the Volta lake) showed relatively high prevalence in 2025. |

### RDT predicted prevalence maps

| 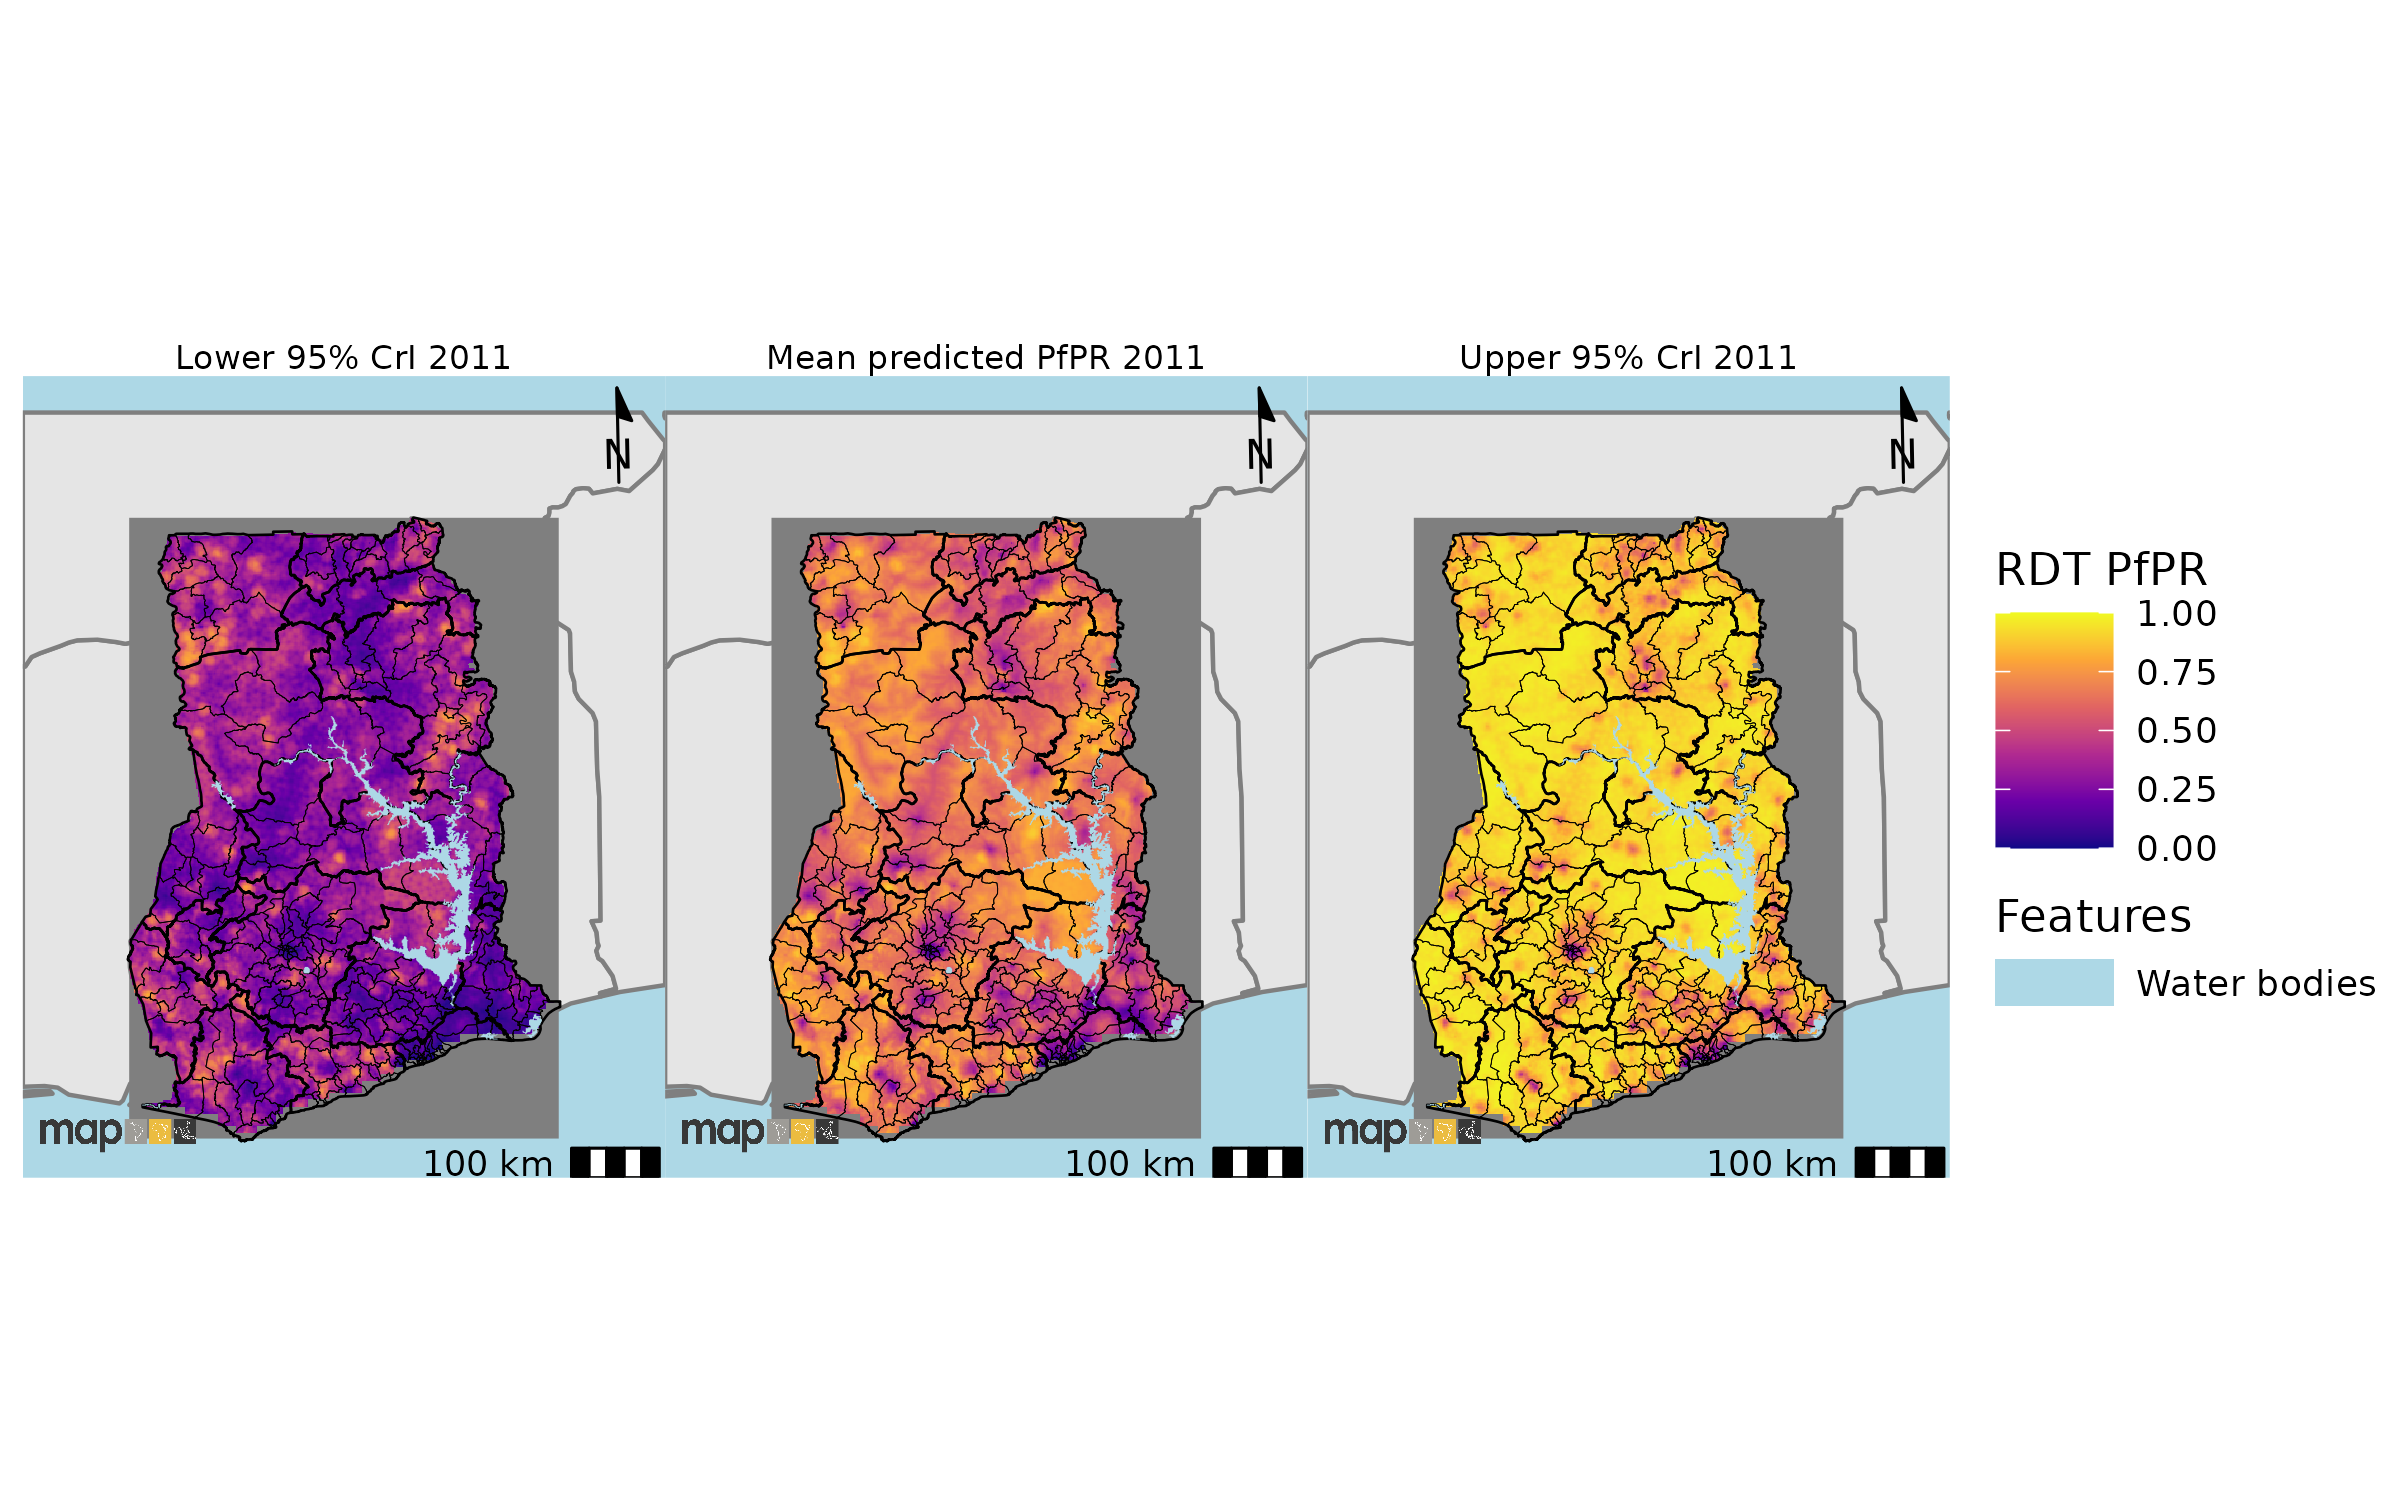 |
| --- |
| 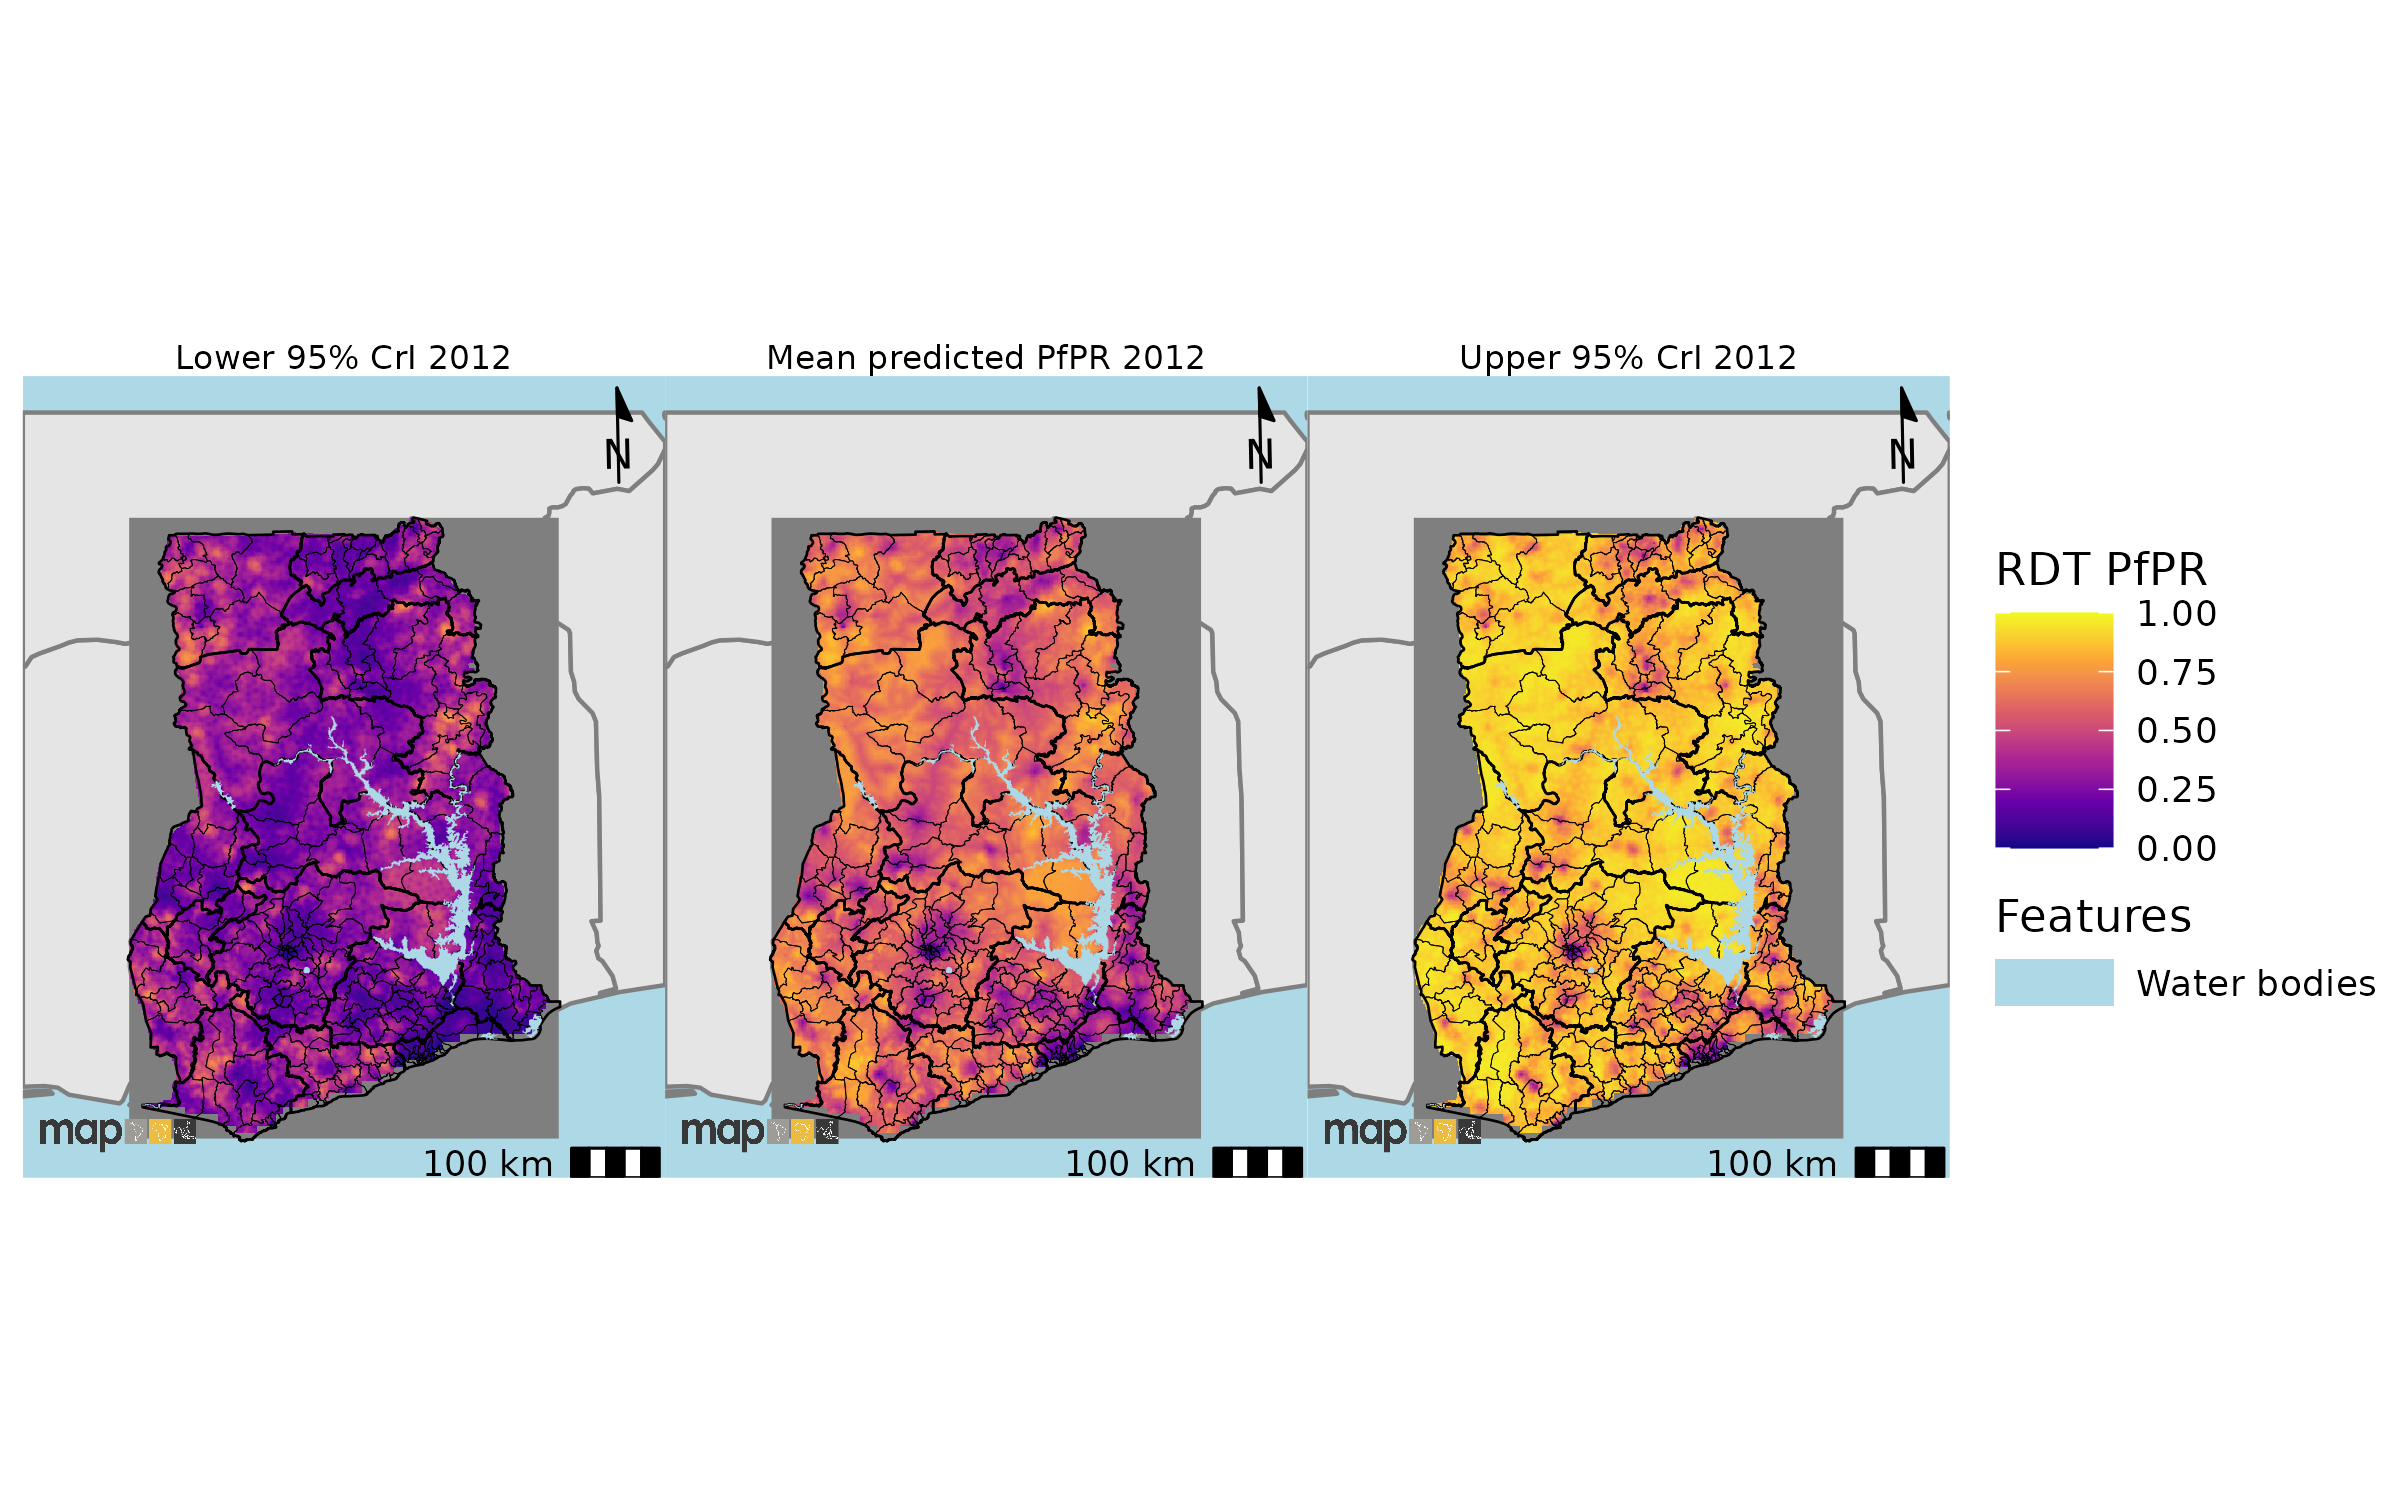 |
| 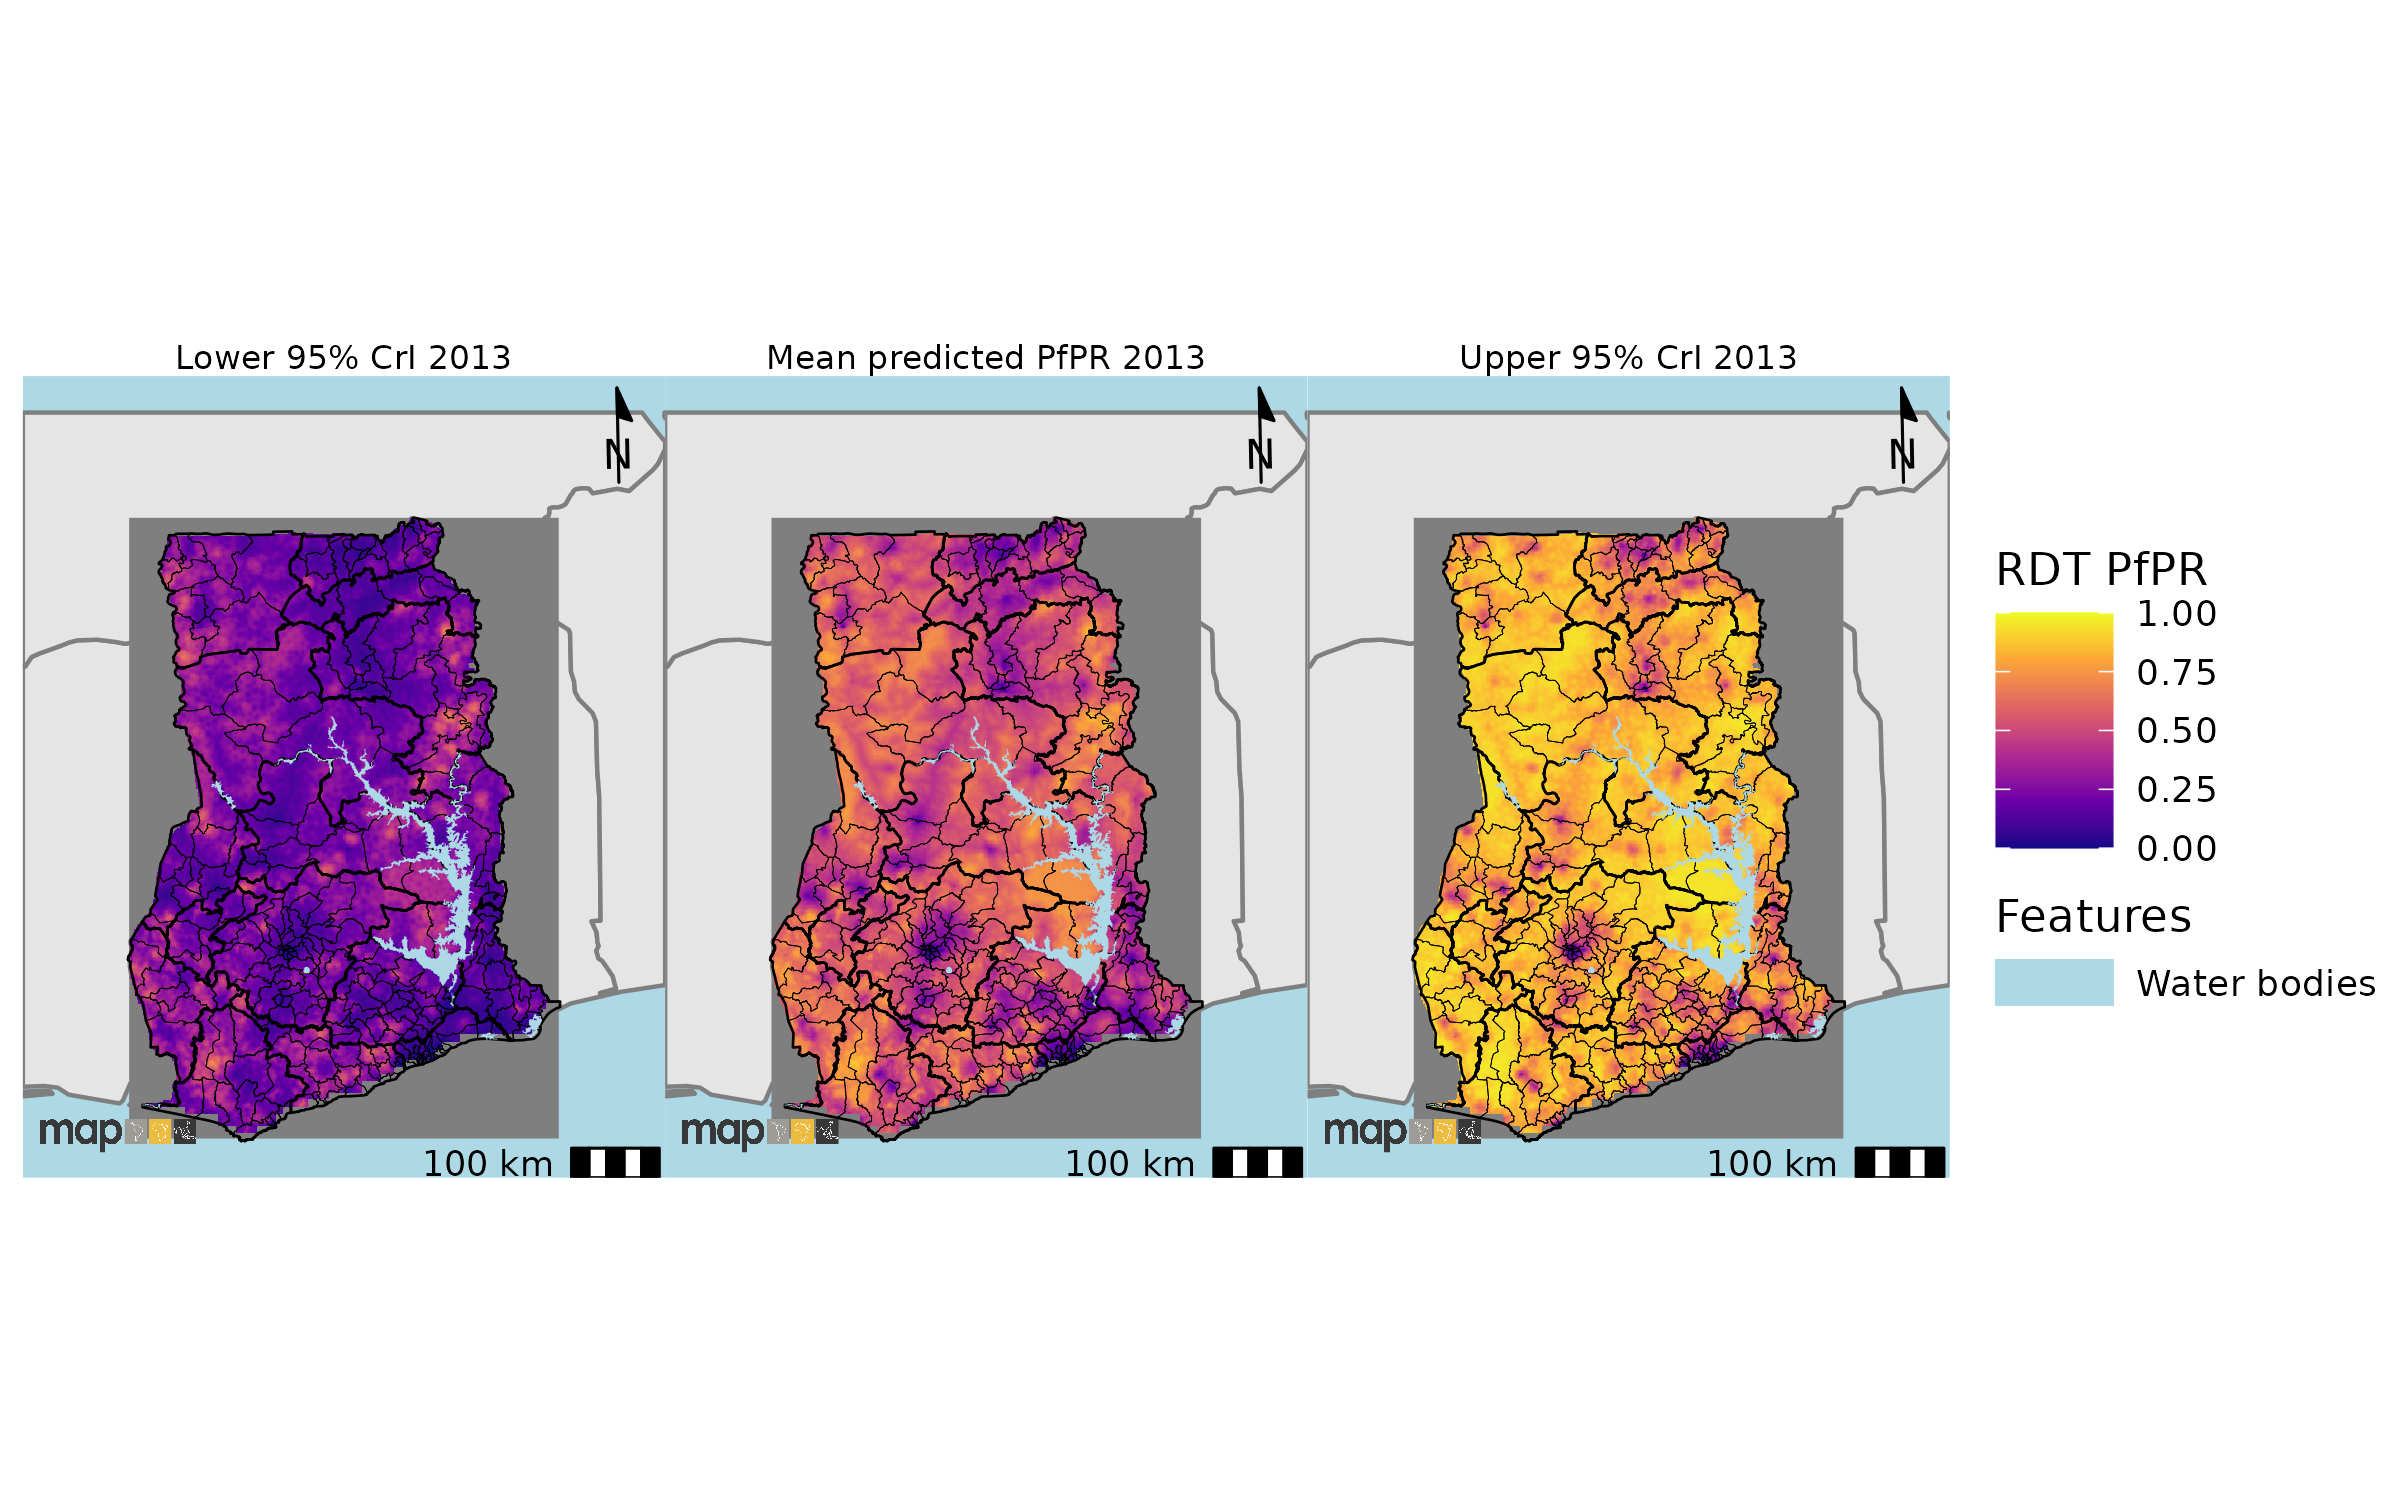 |
| 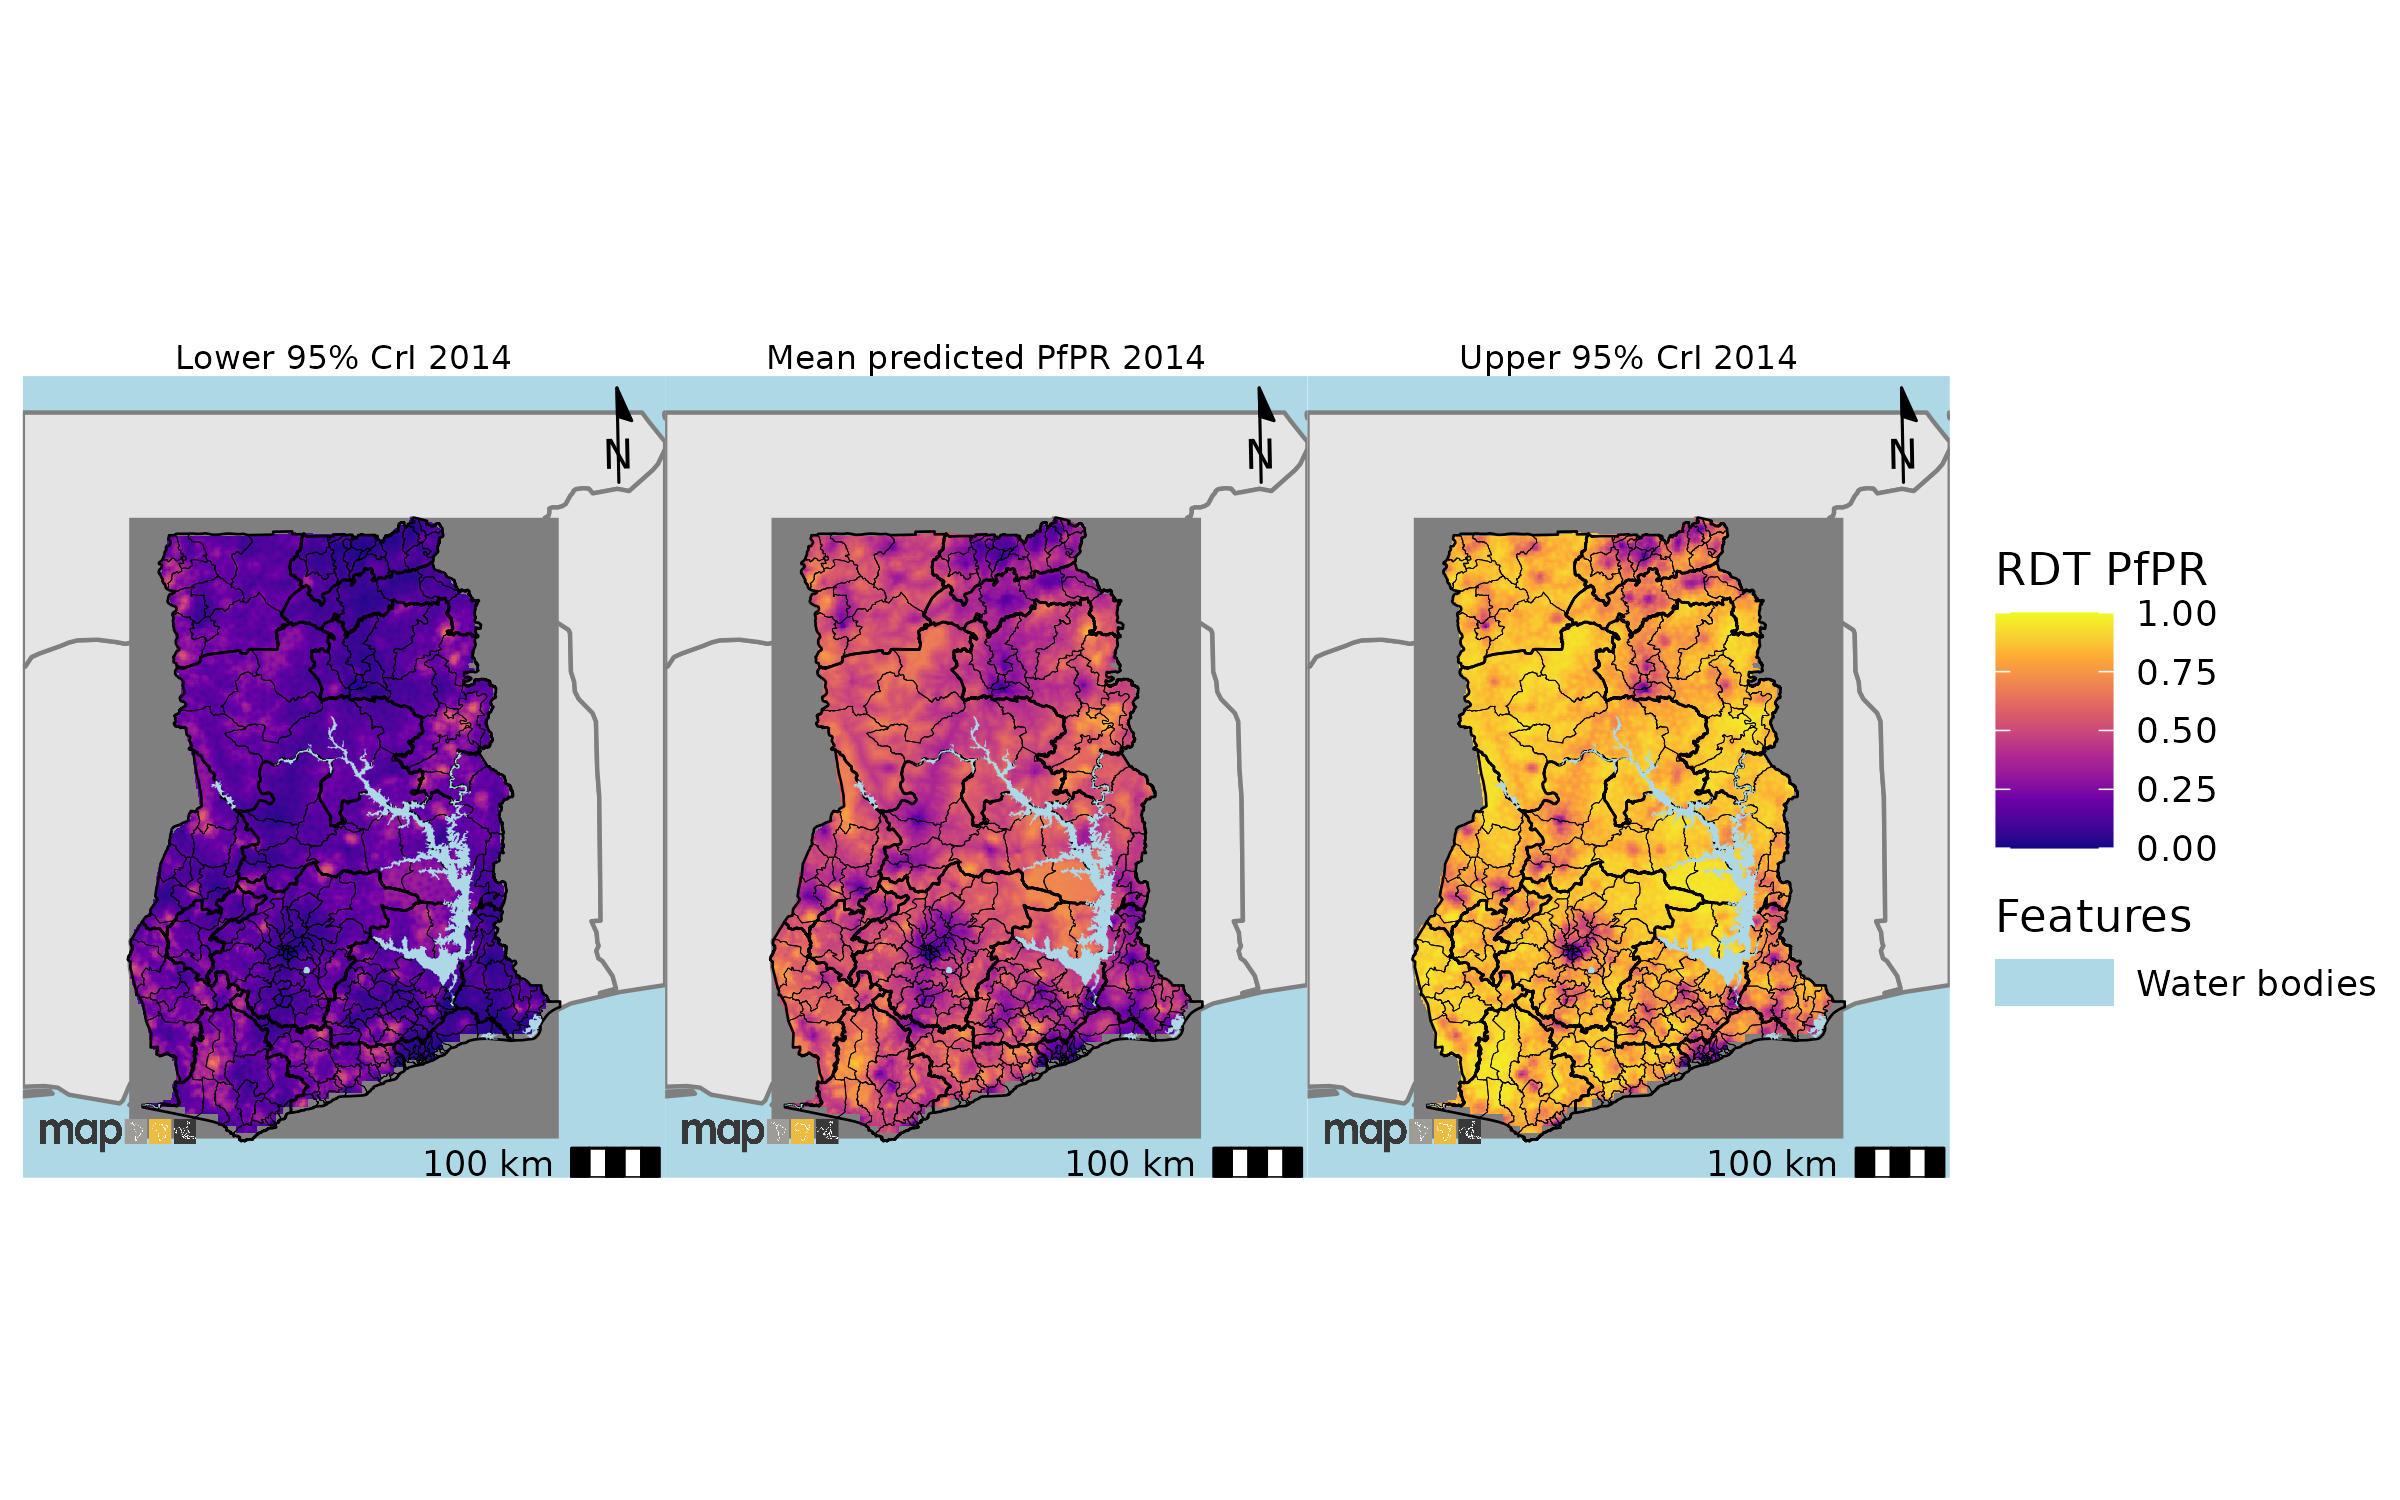 |
| 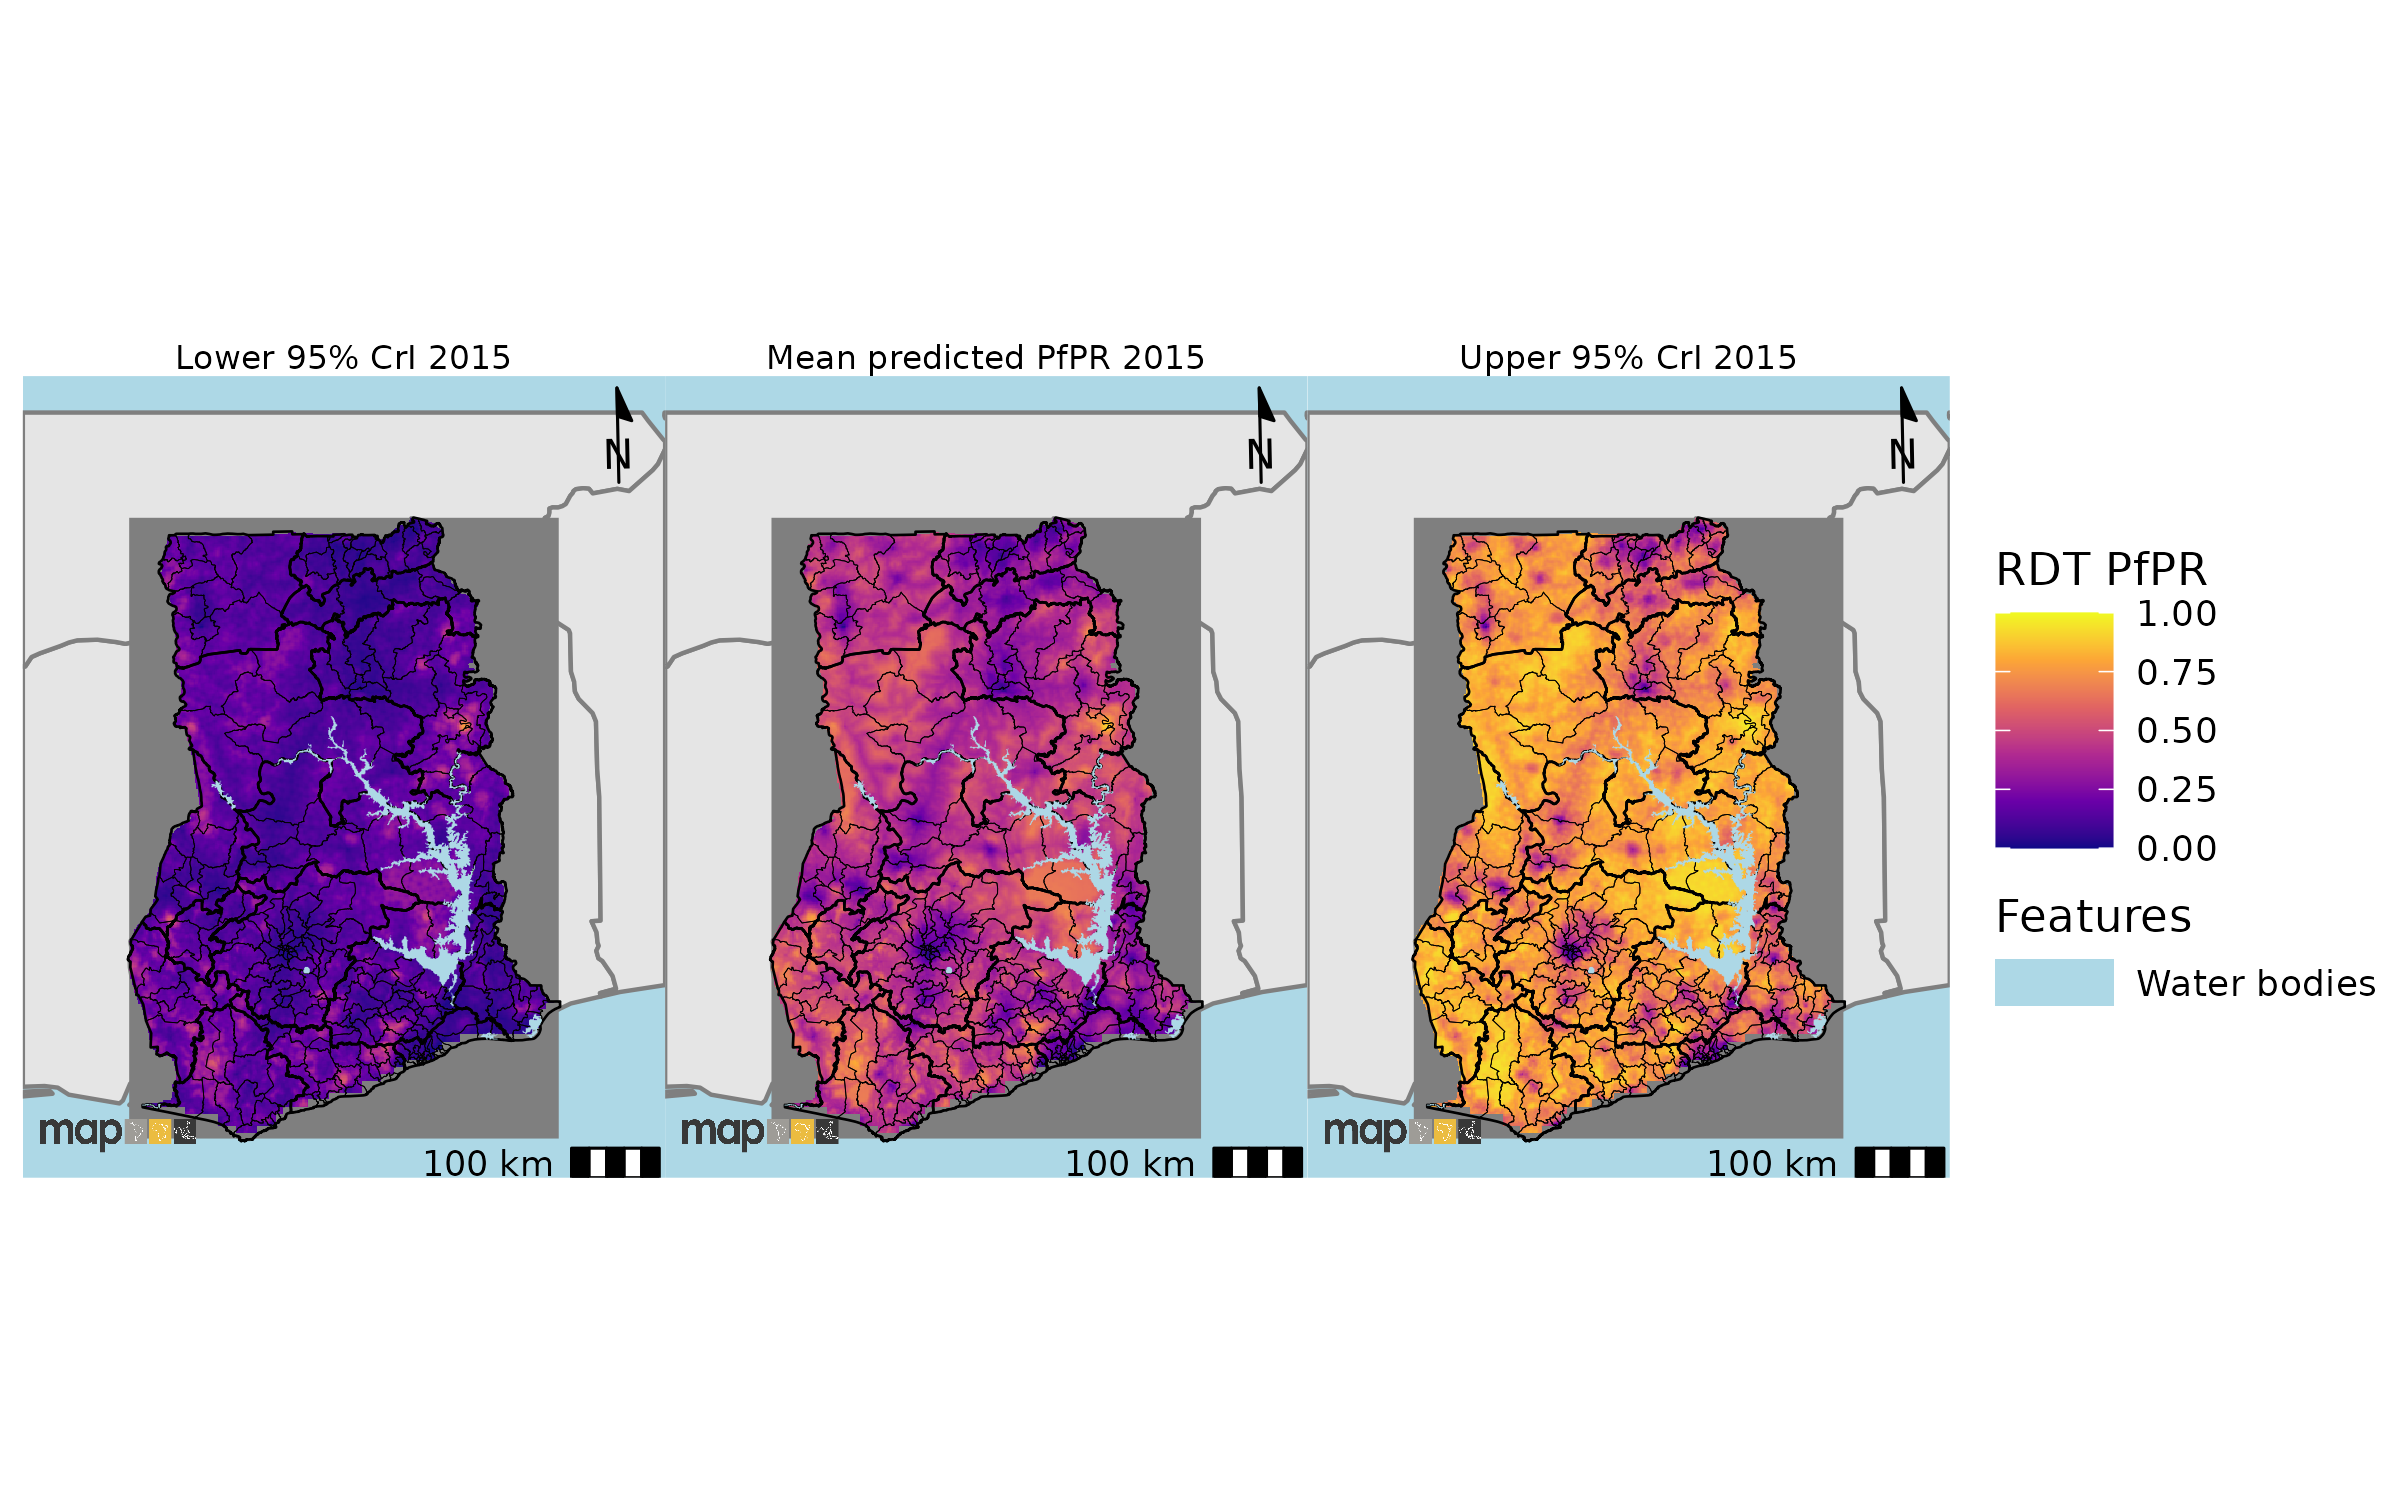 |
| 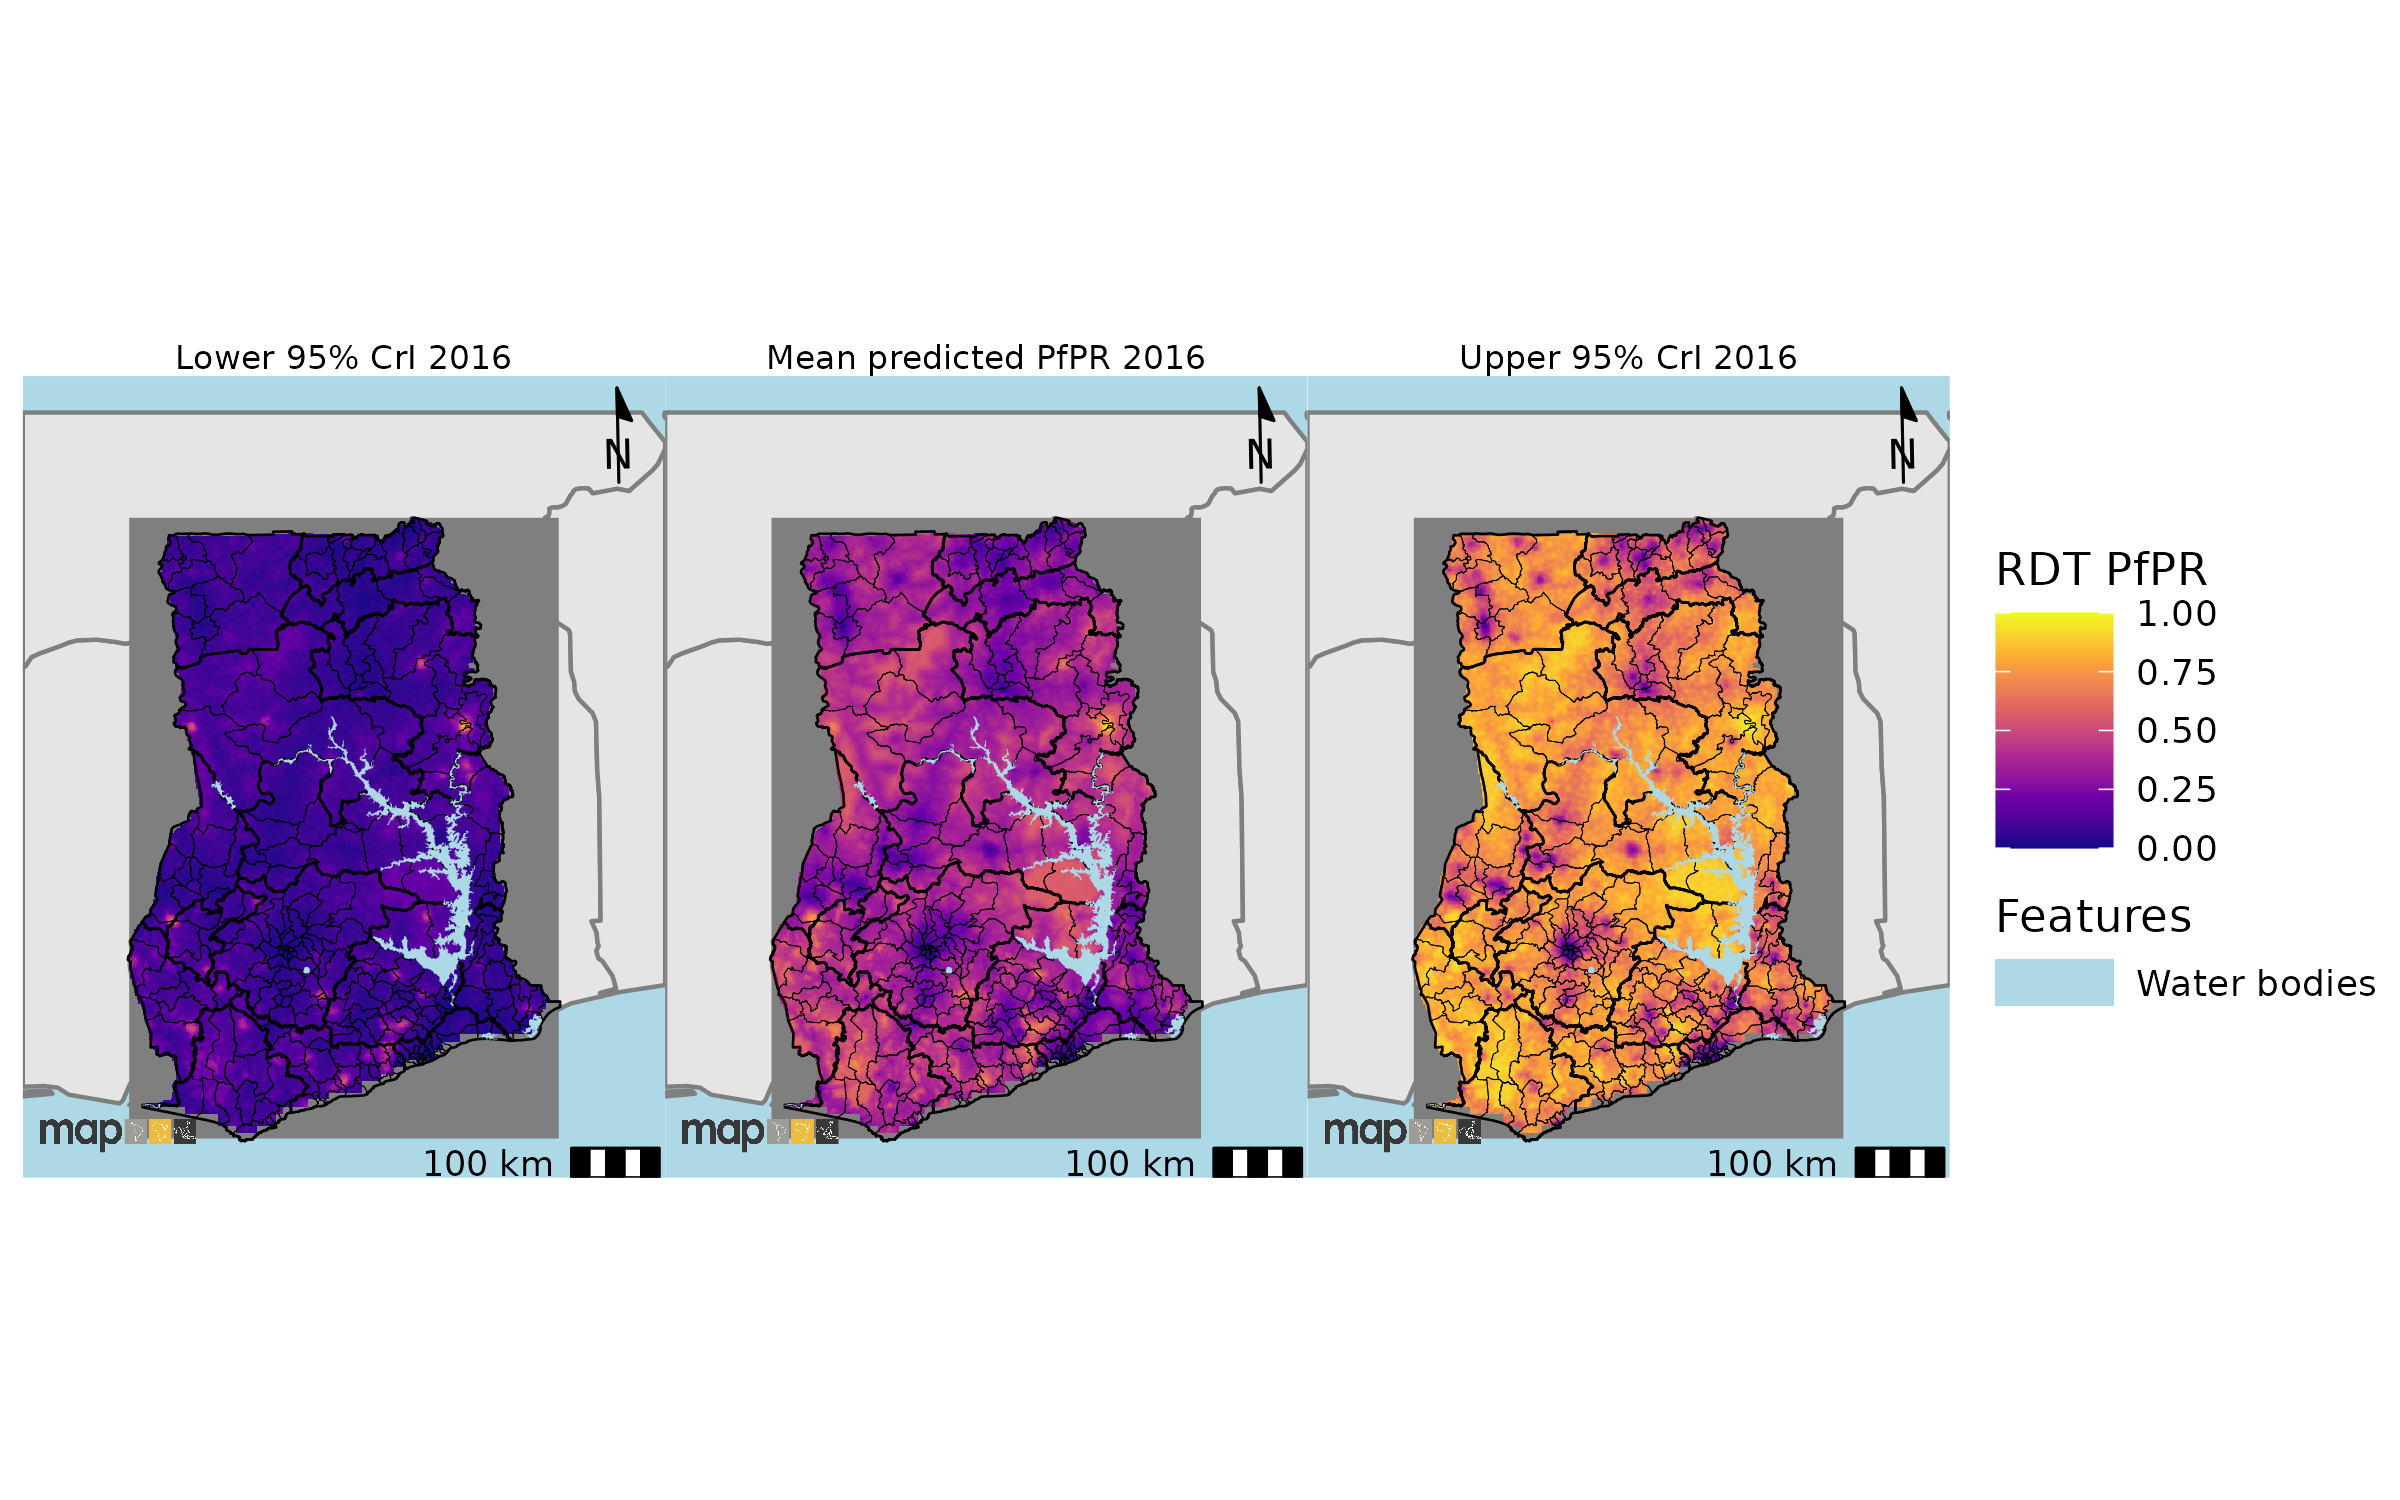 |
| 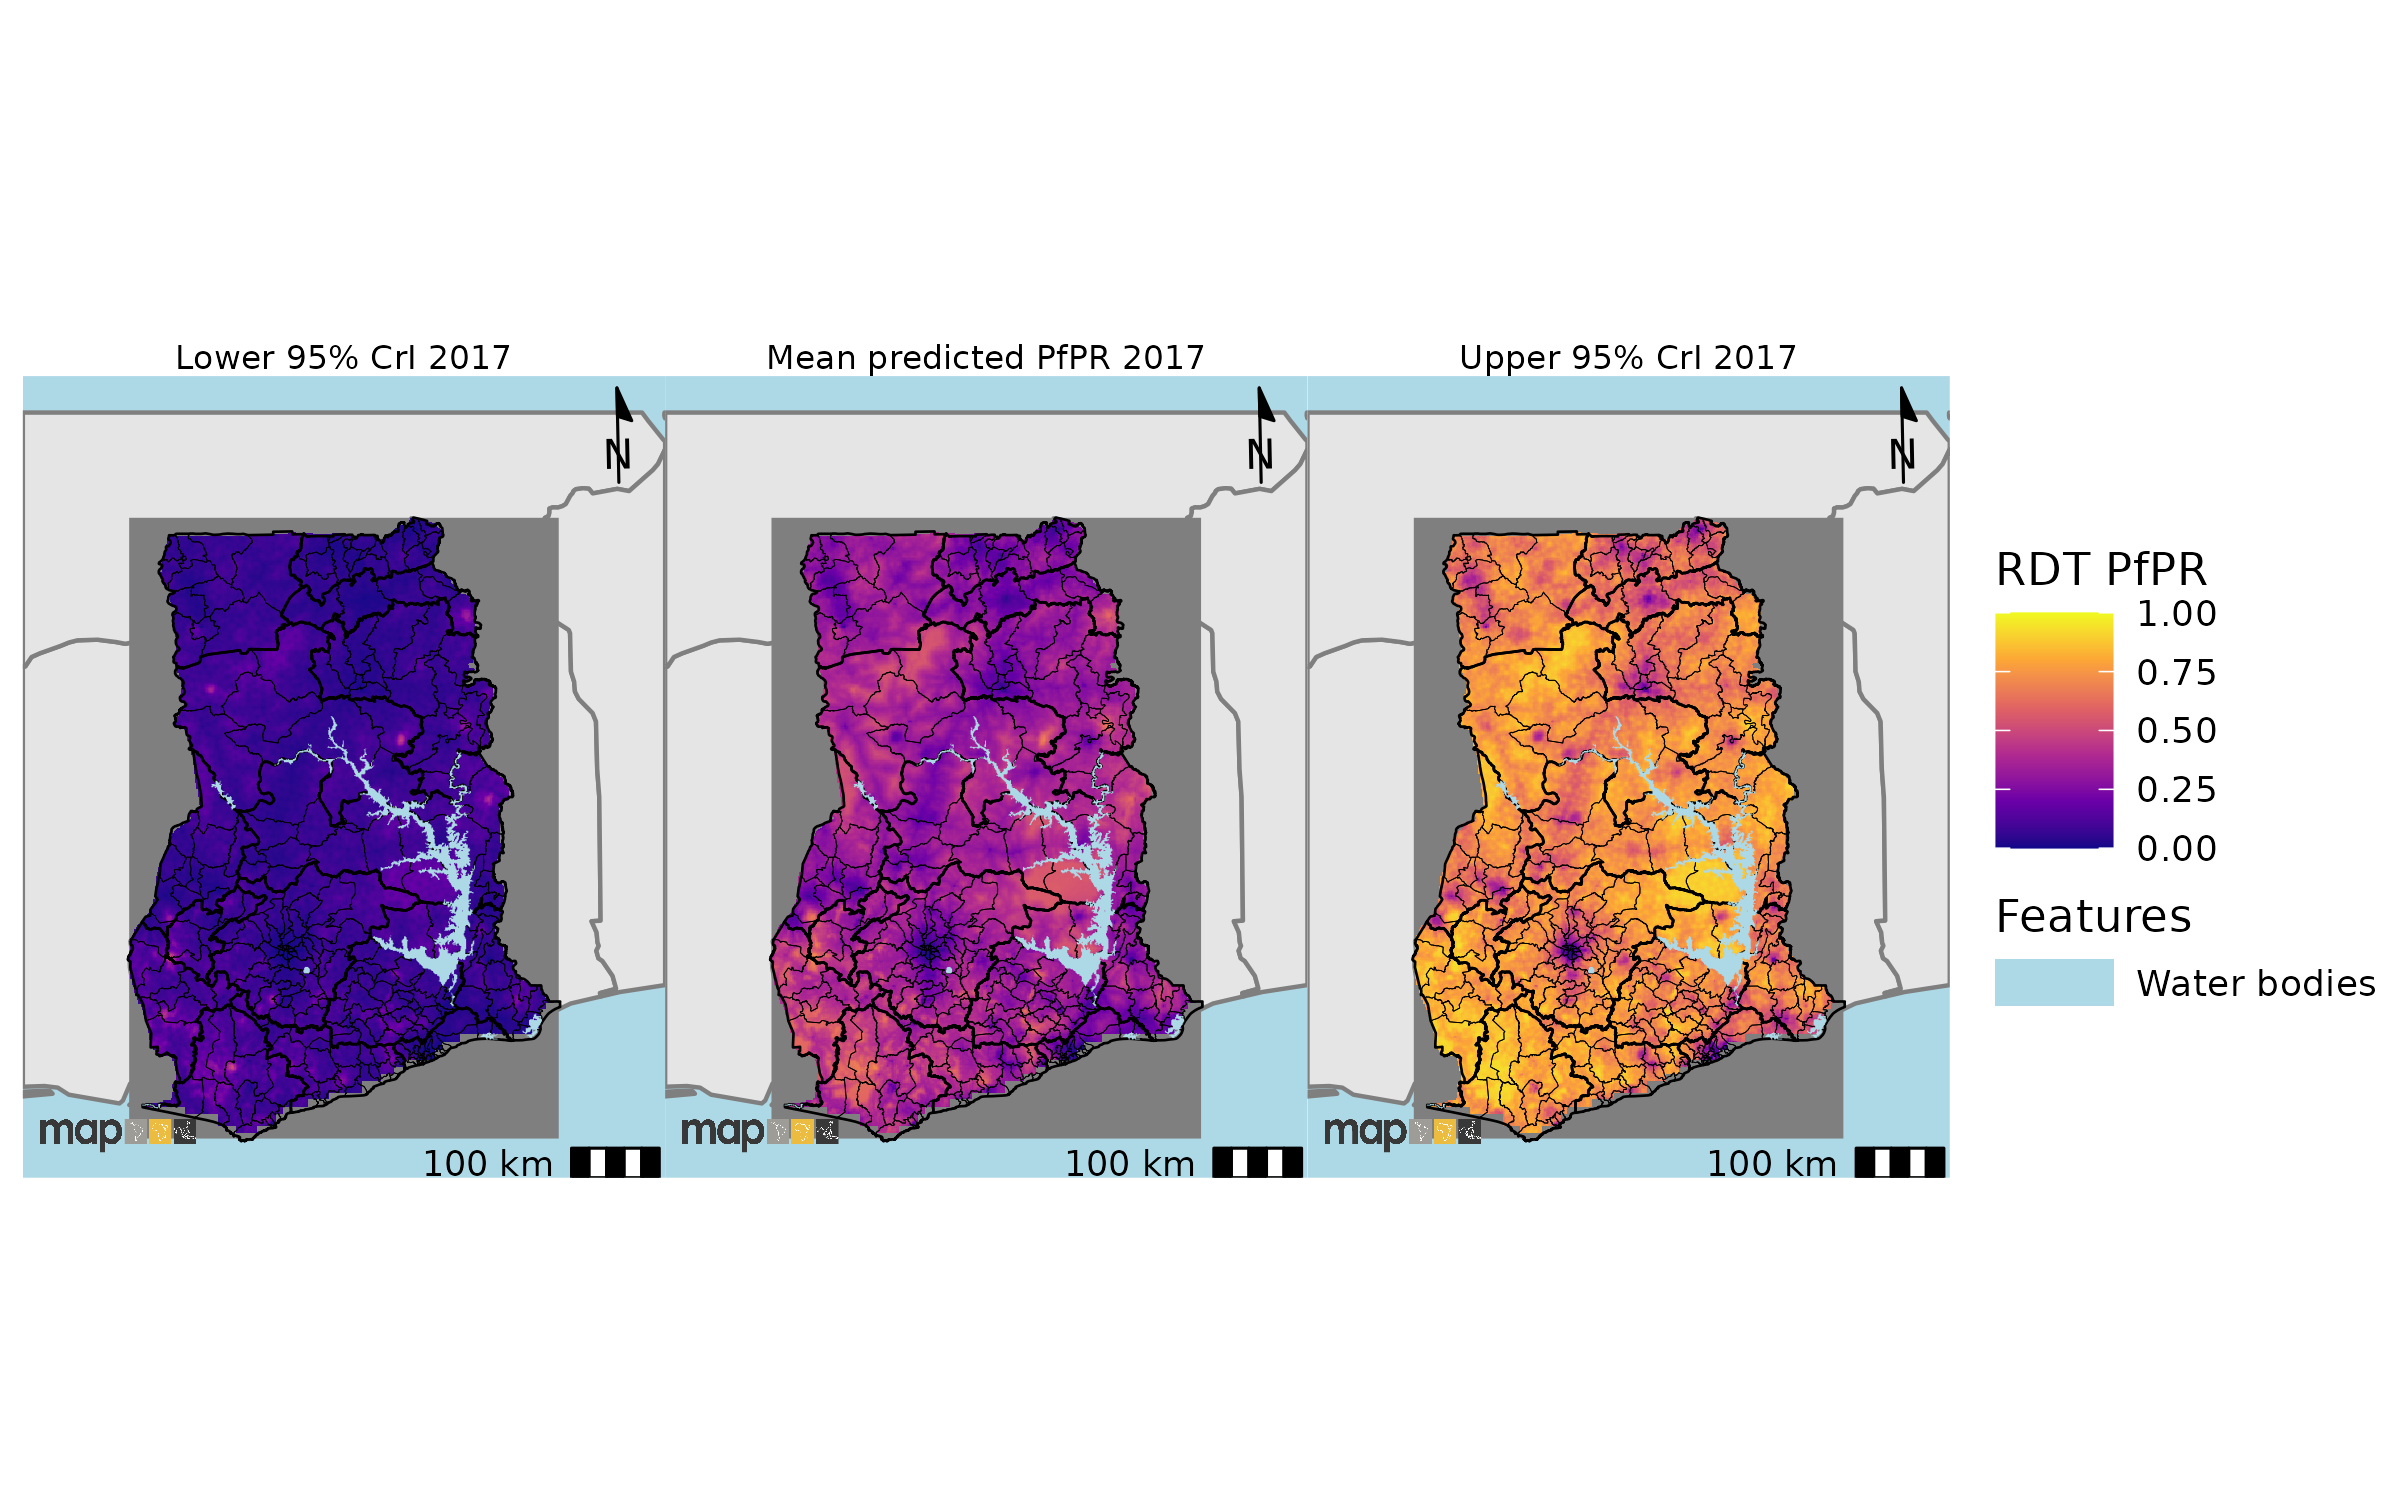 |
| 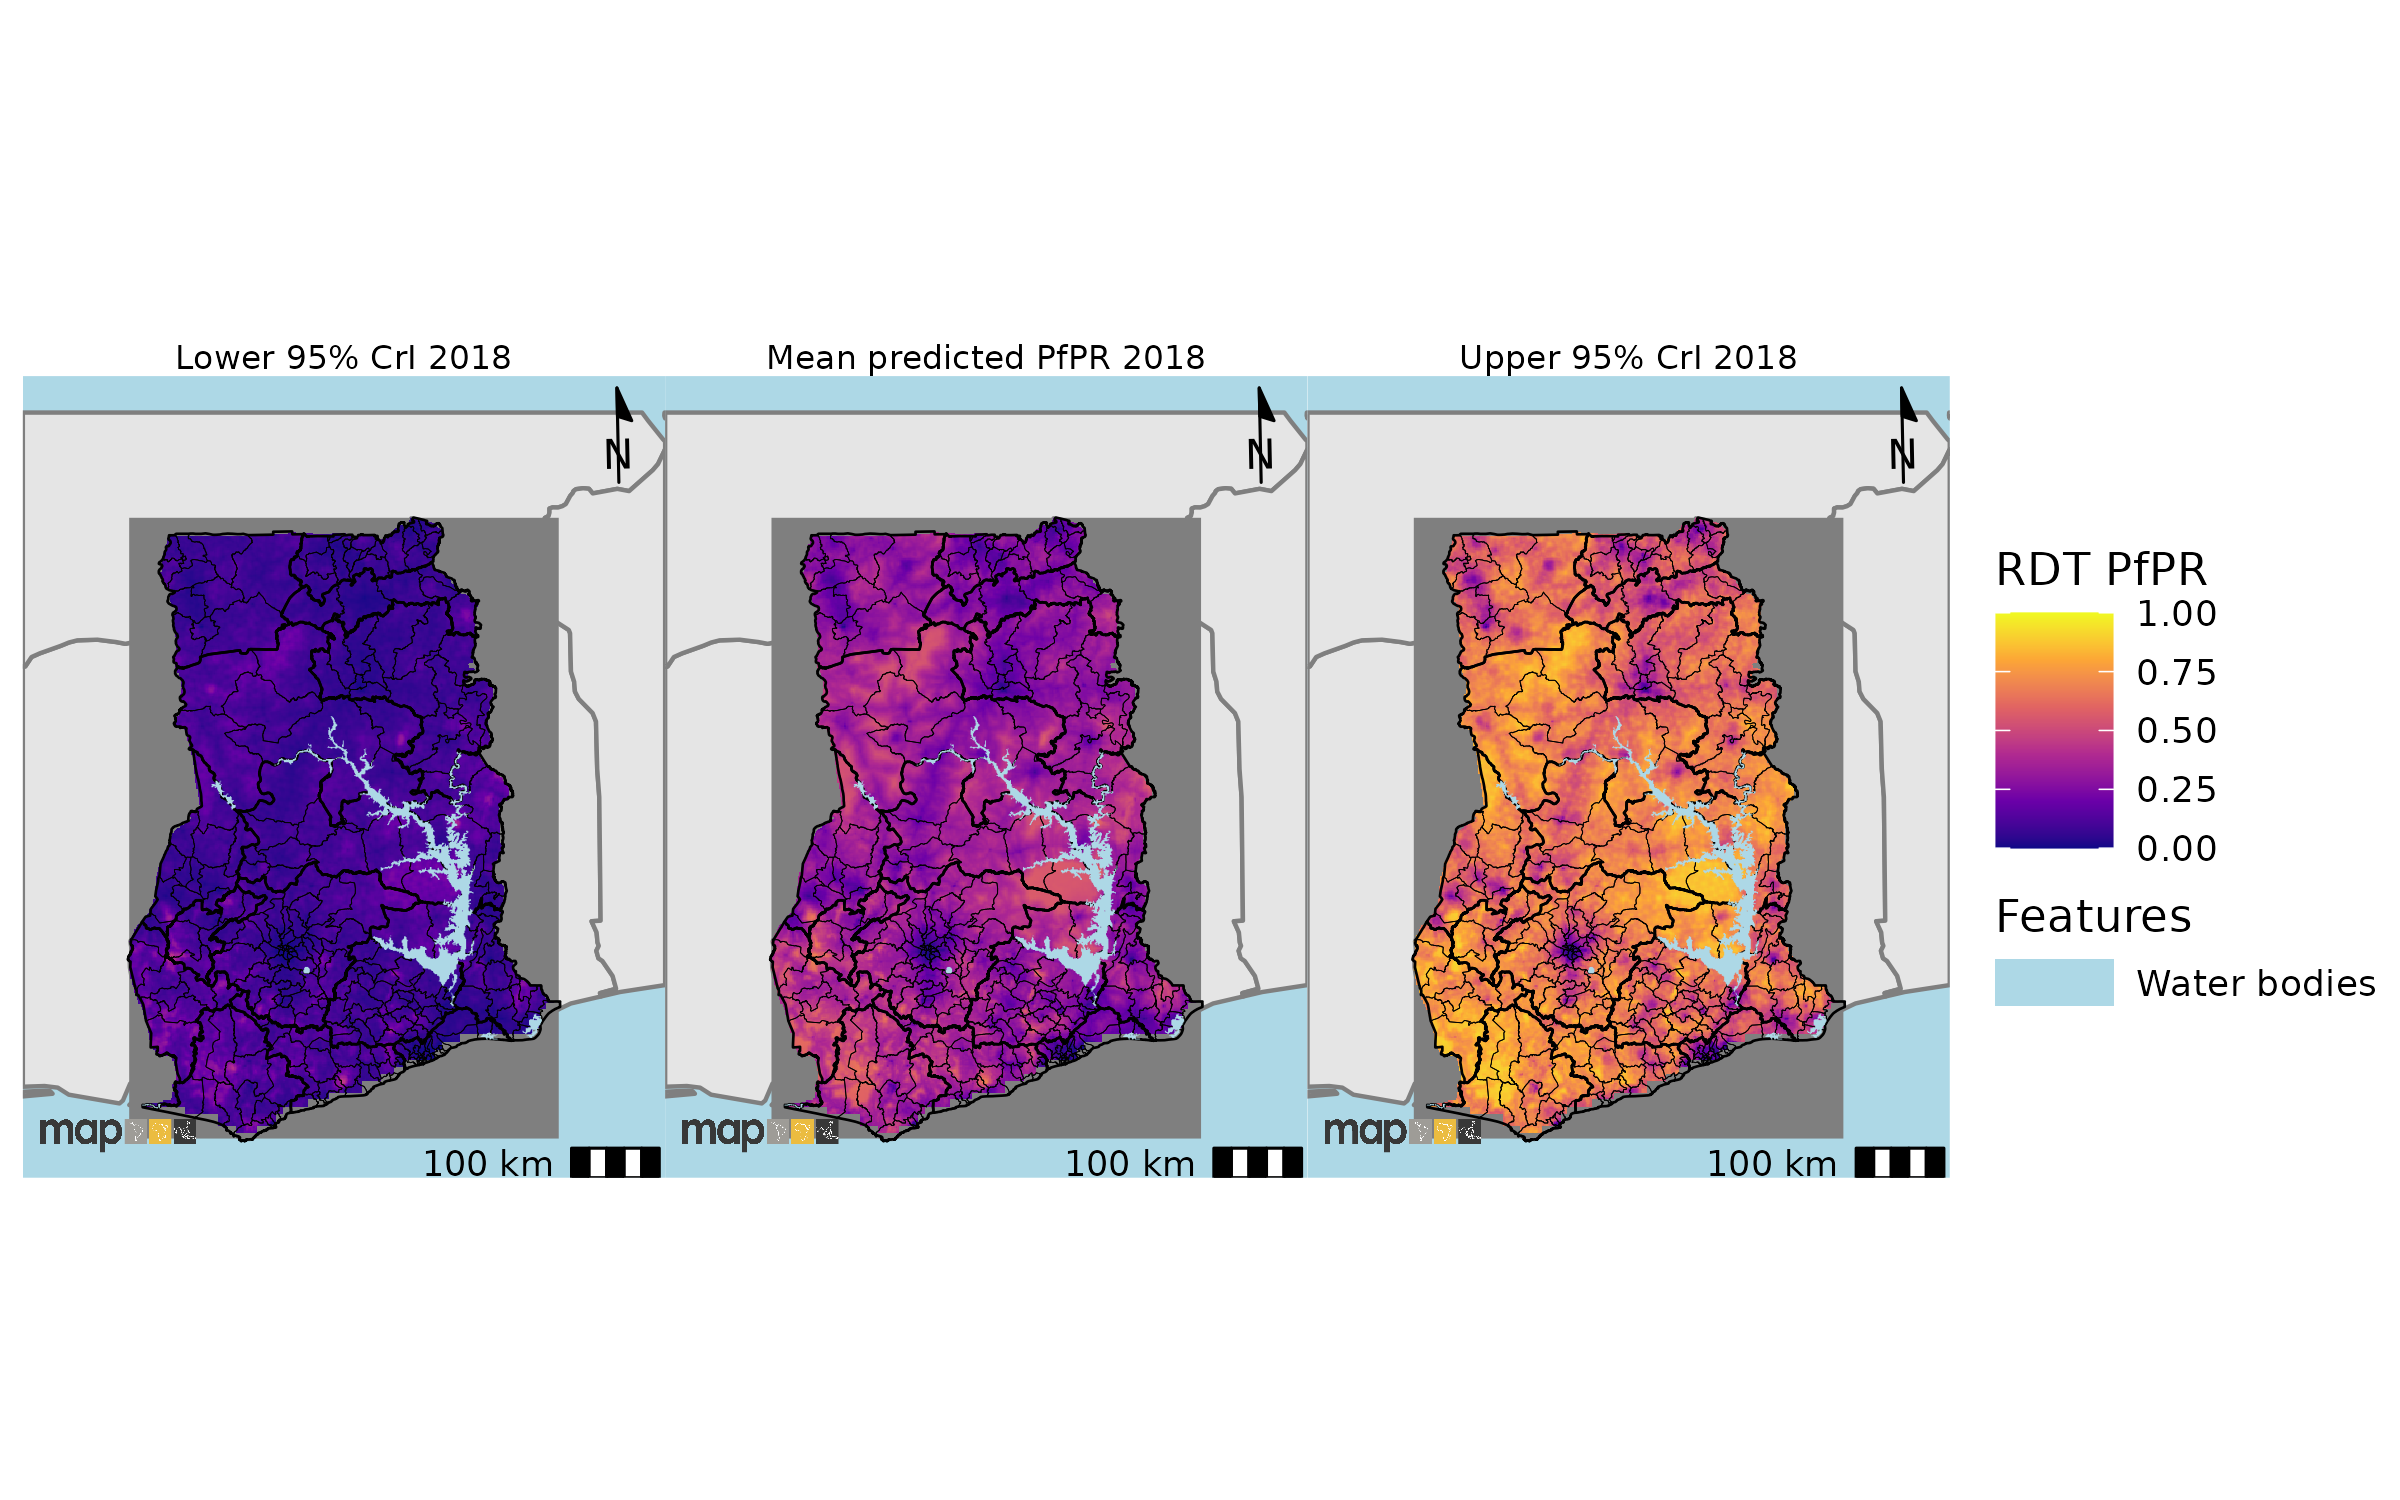 |
| 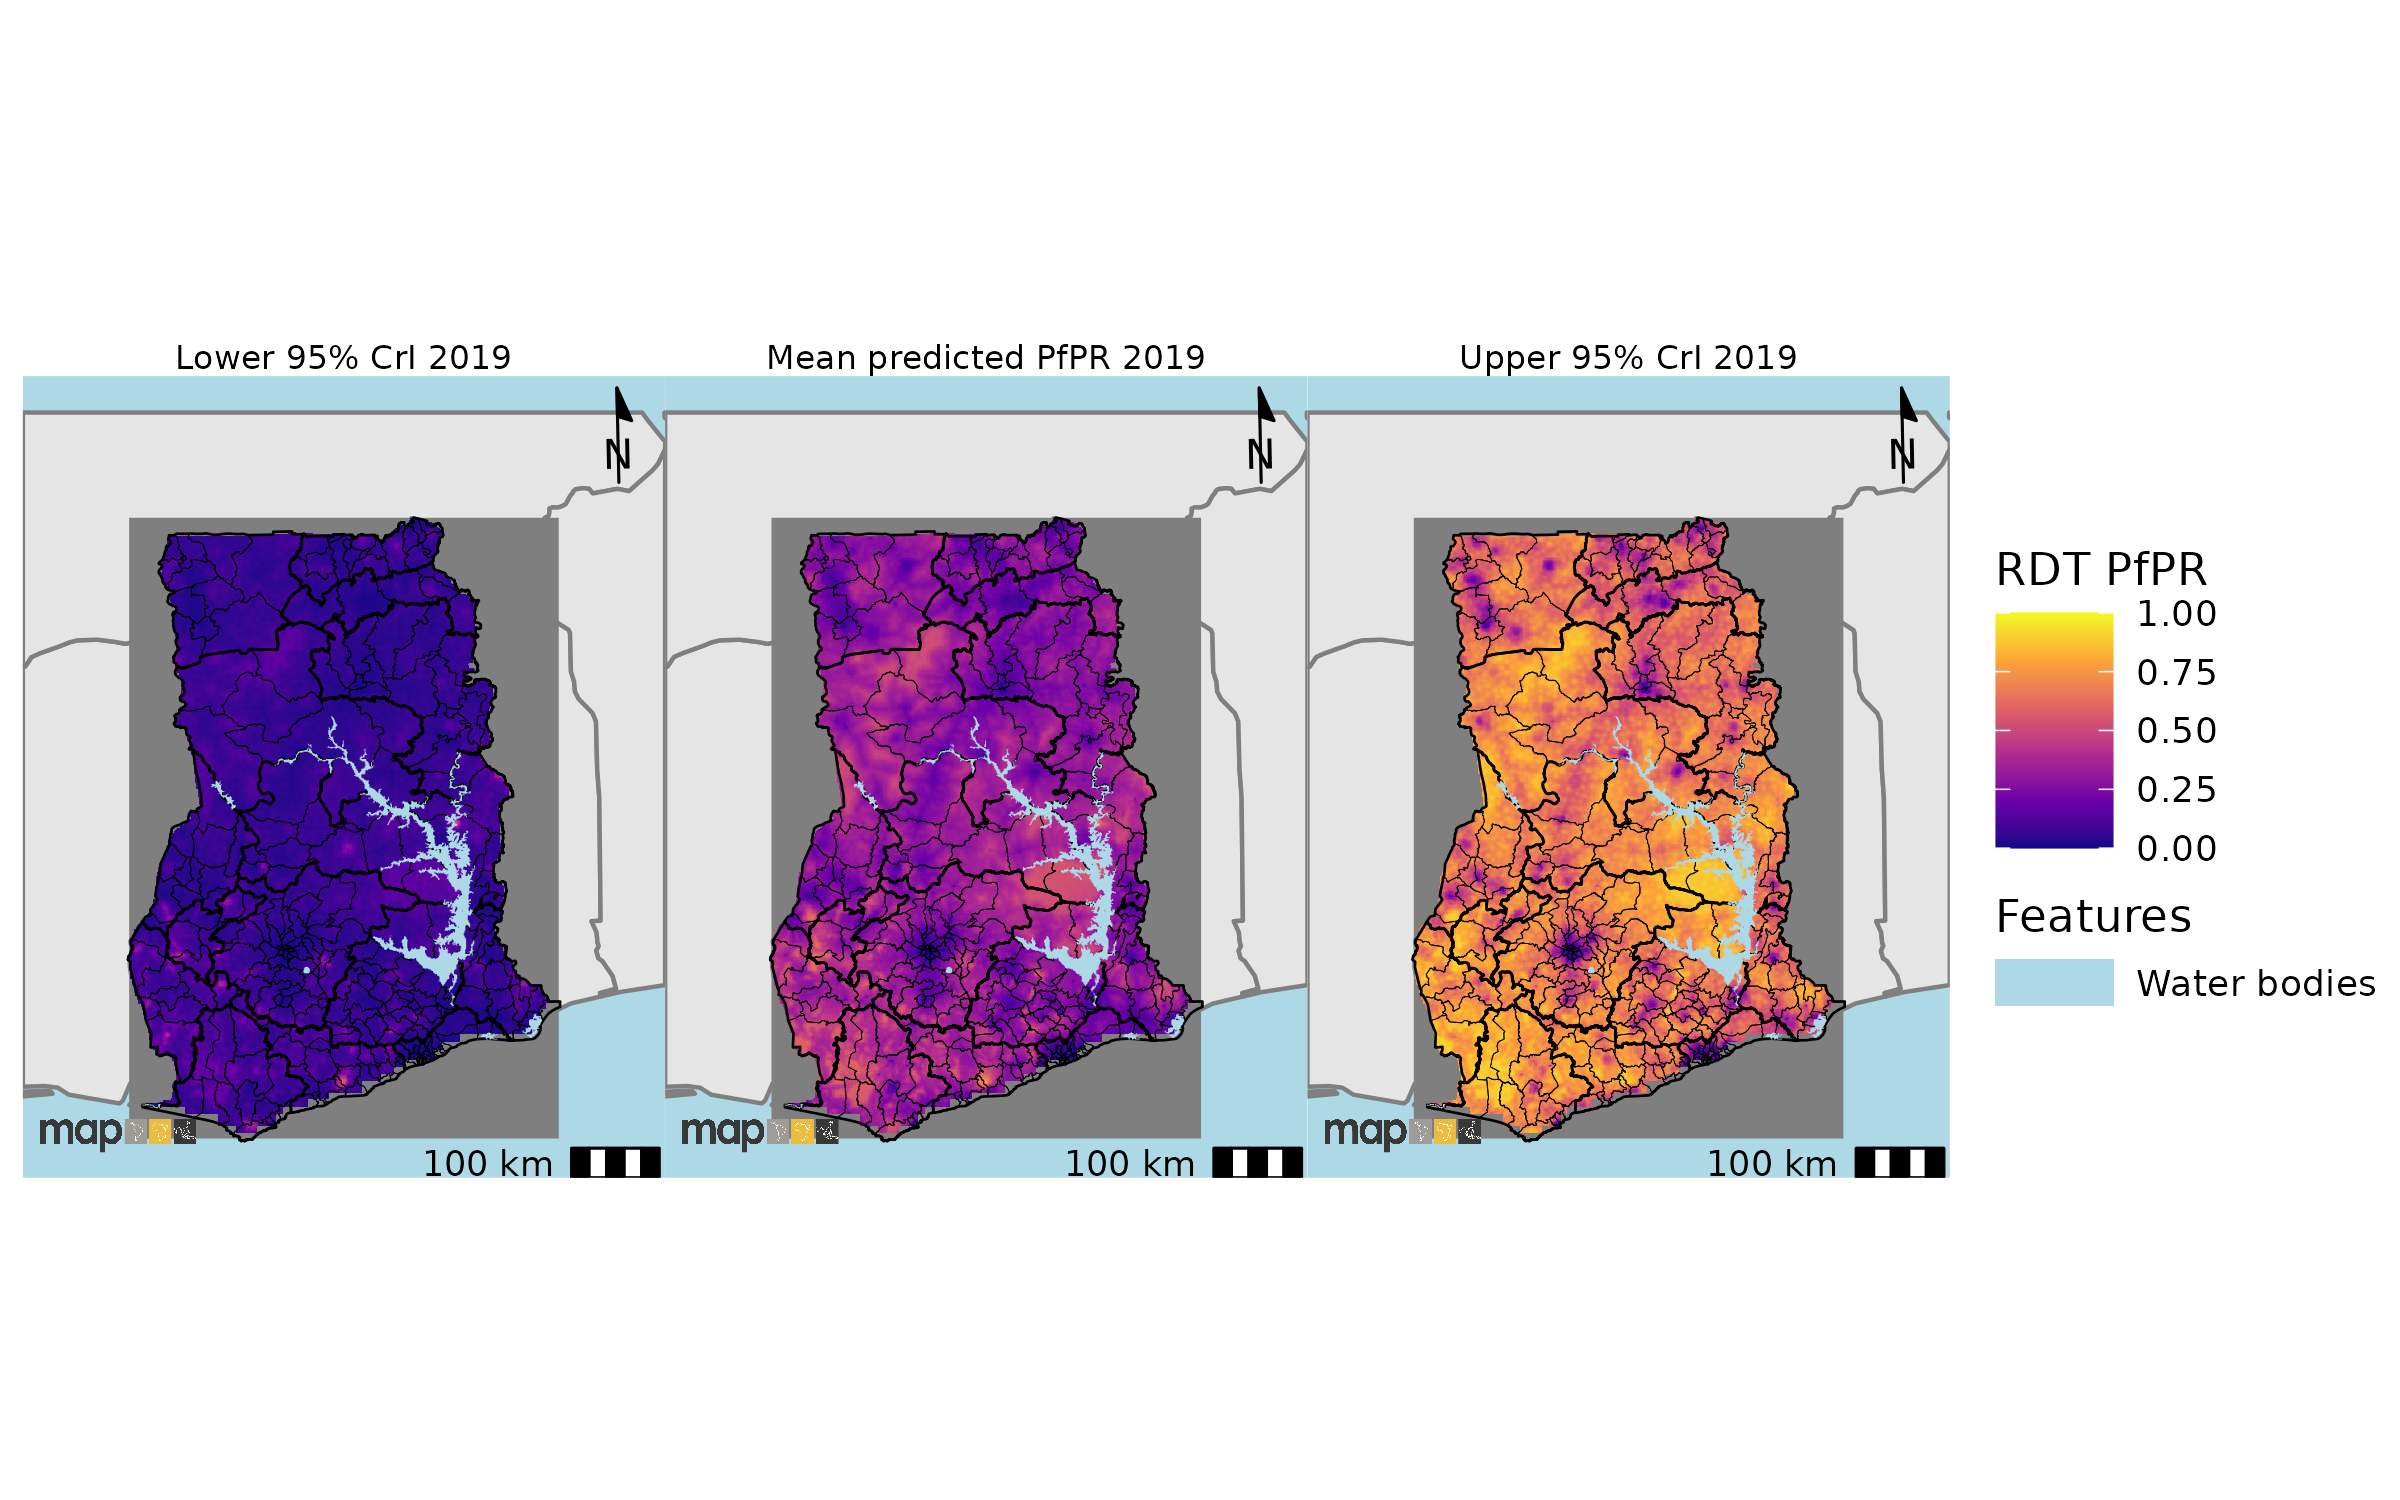 |
| 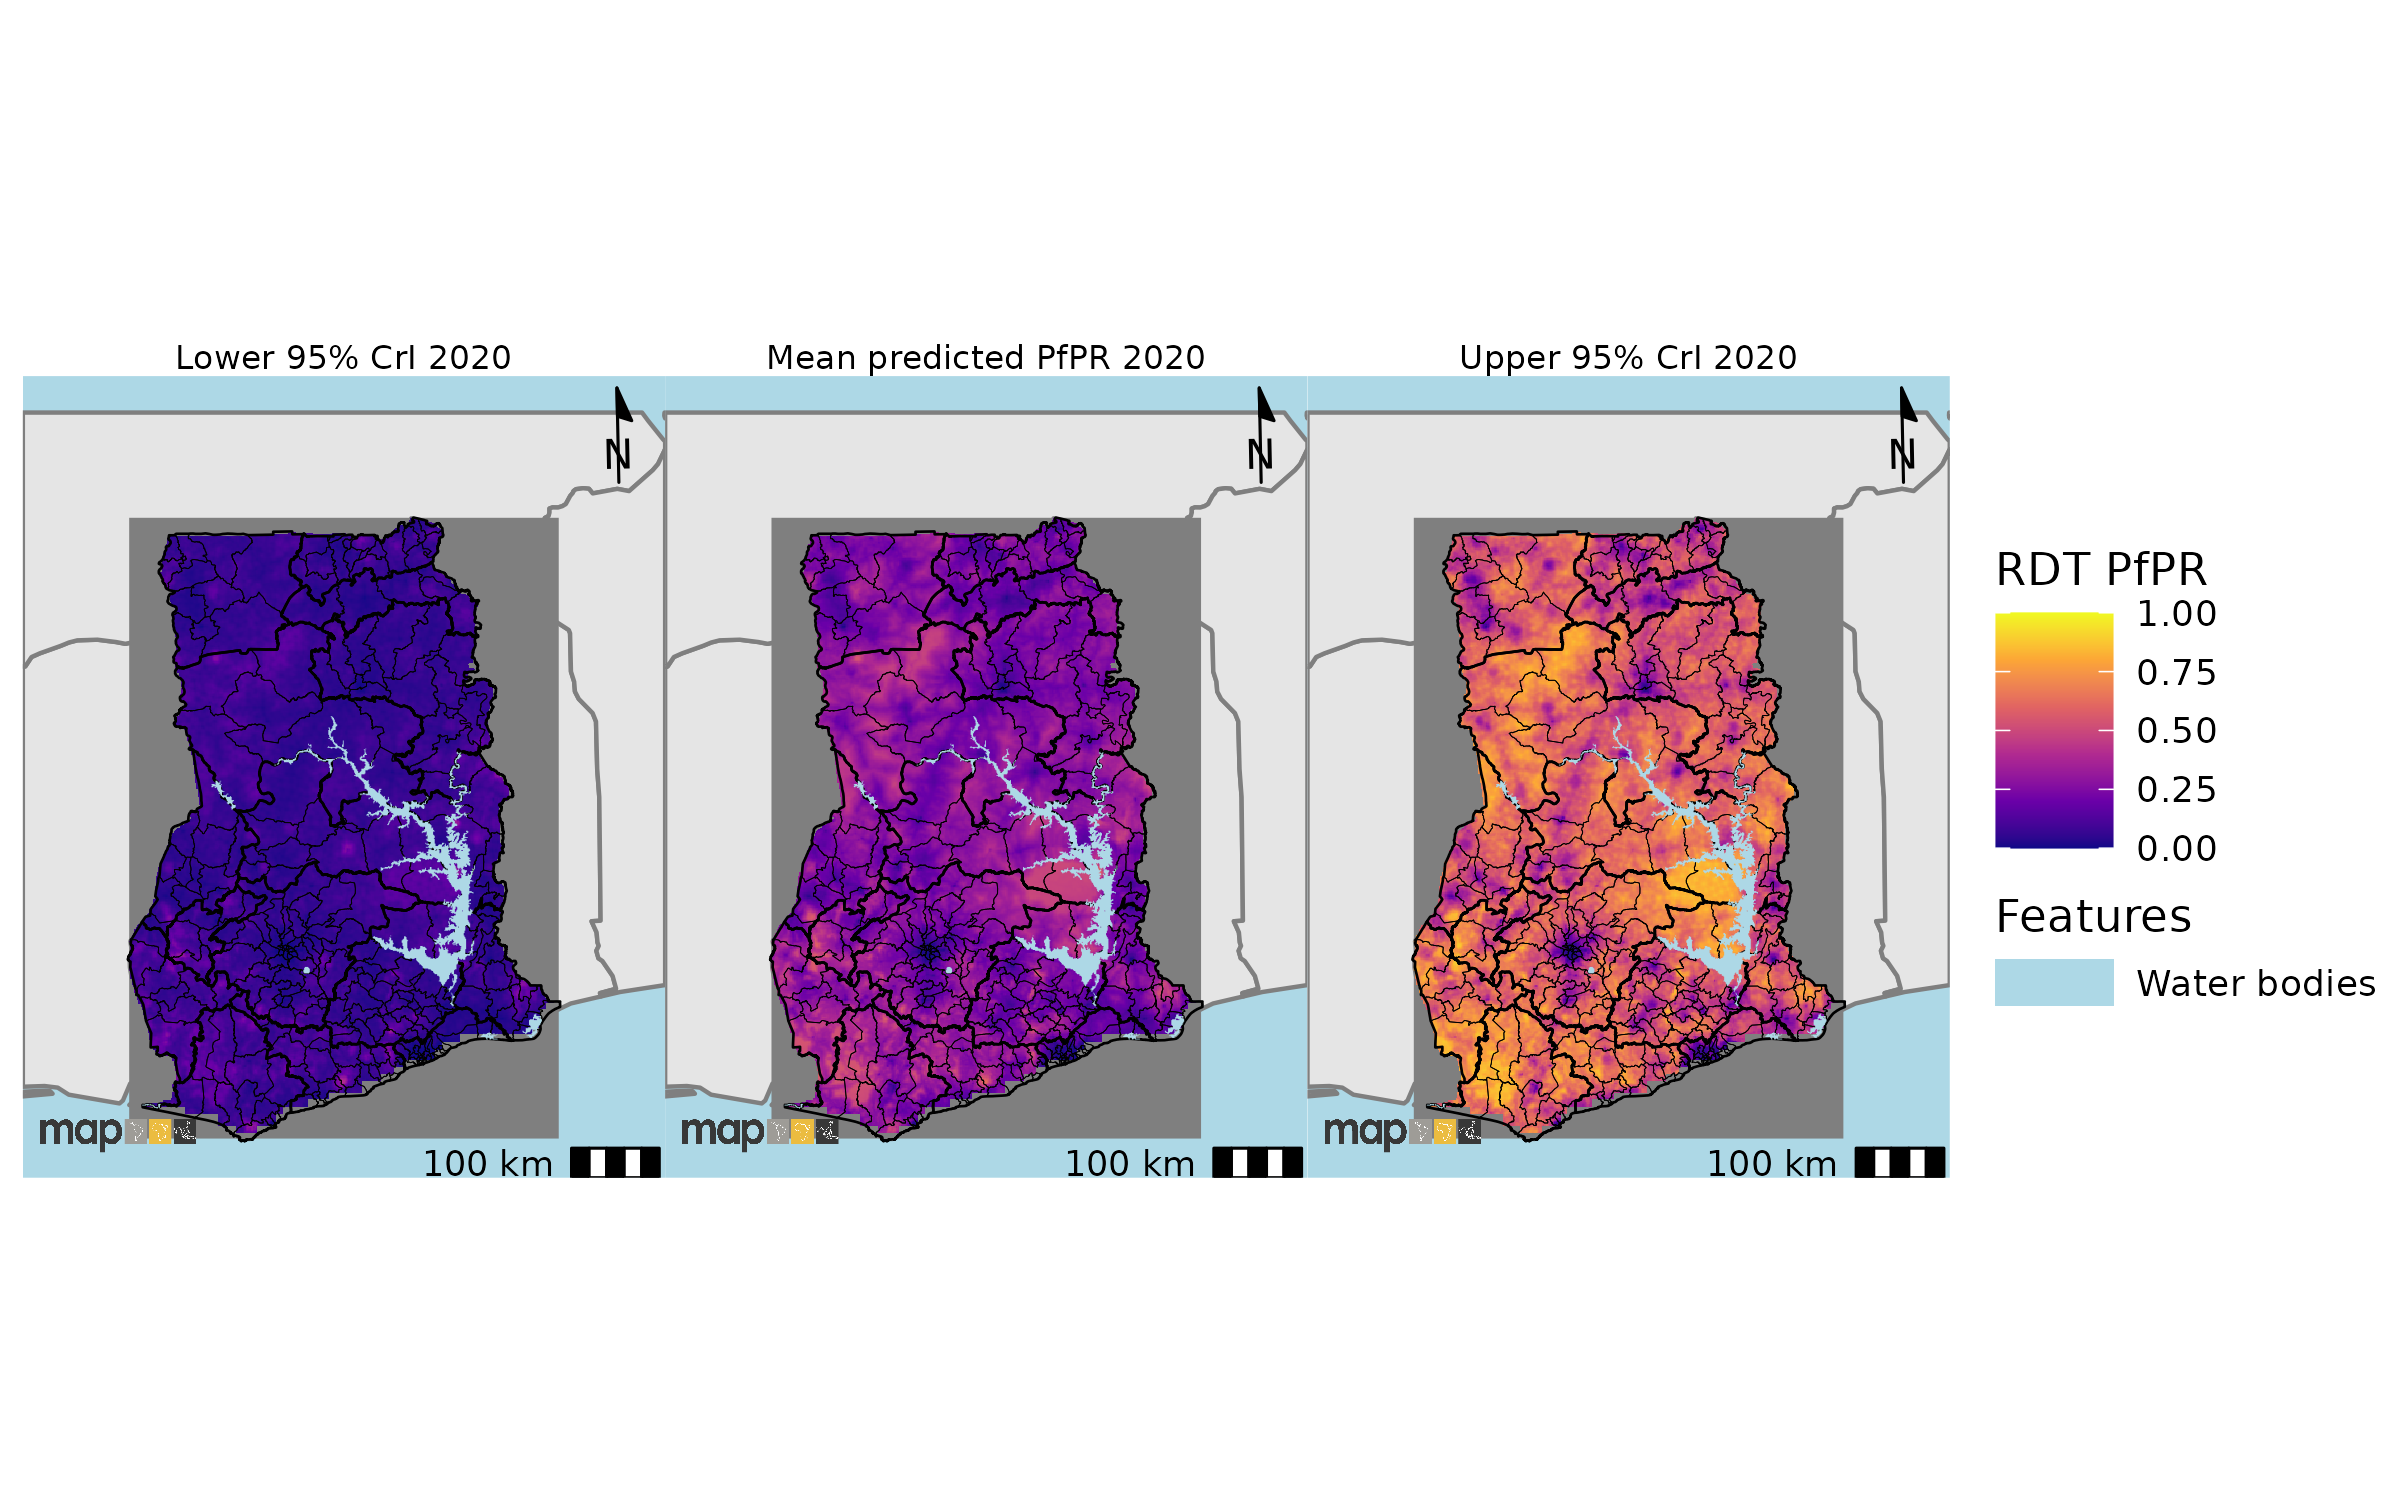 |
| 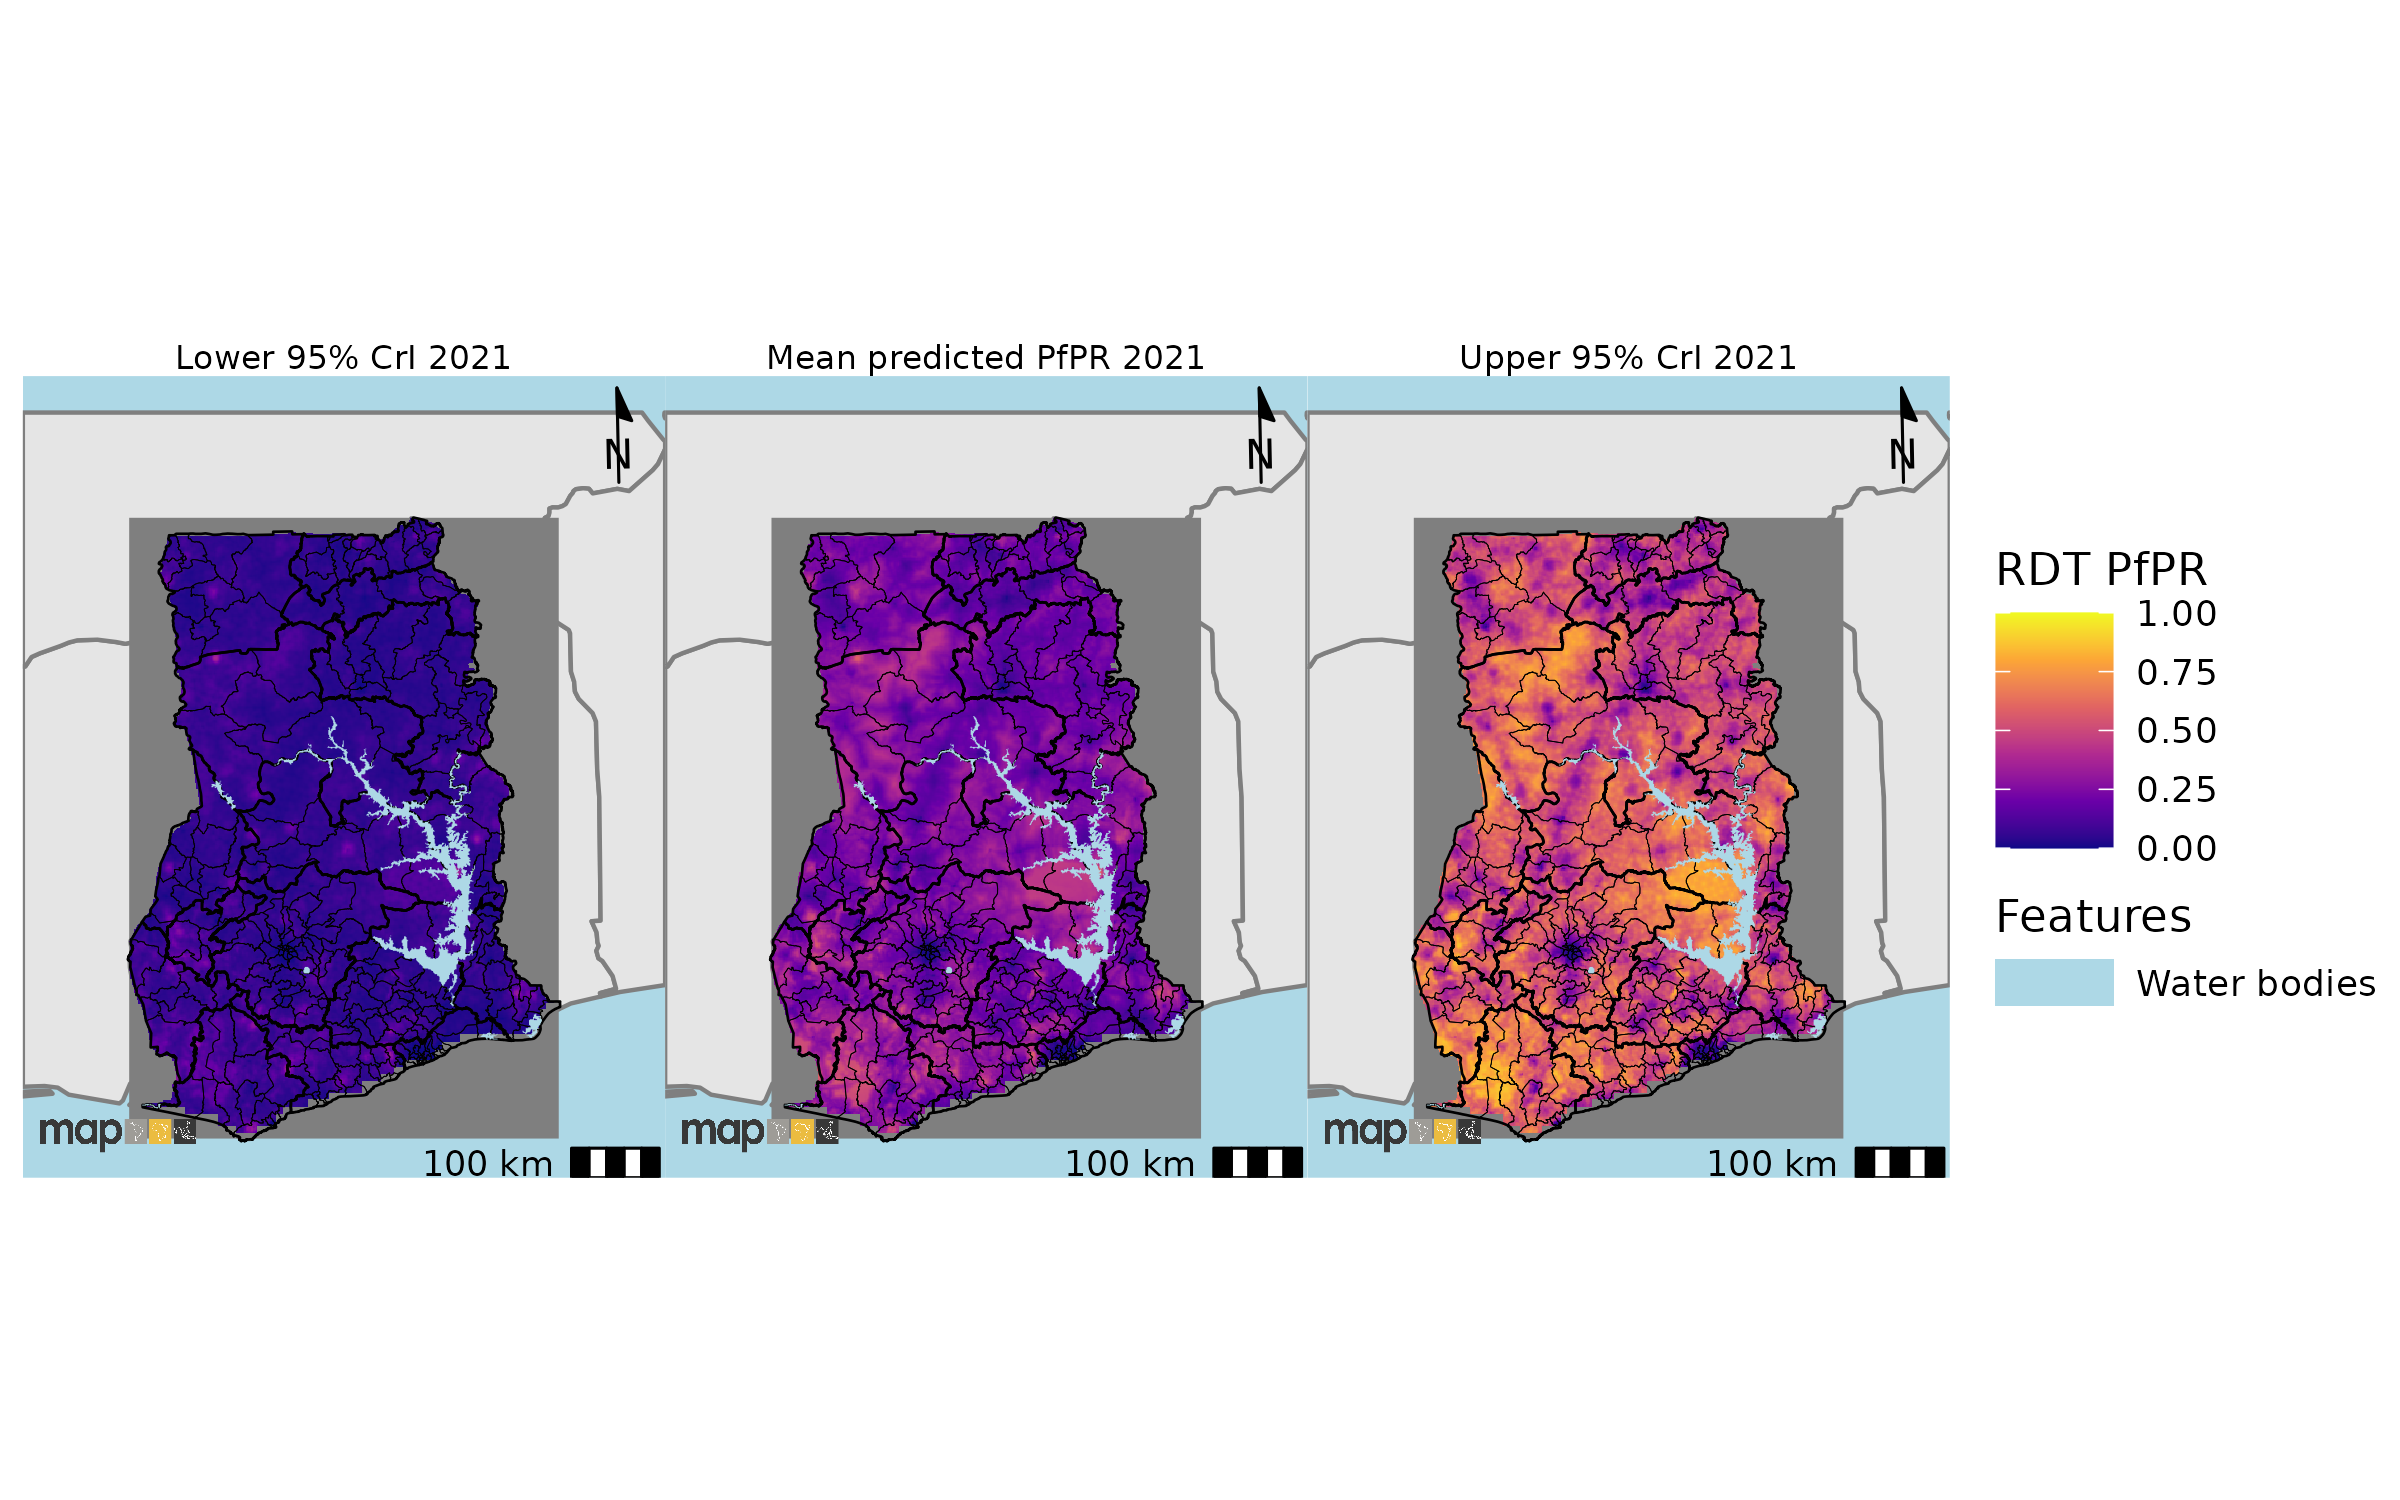 |
| 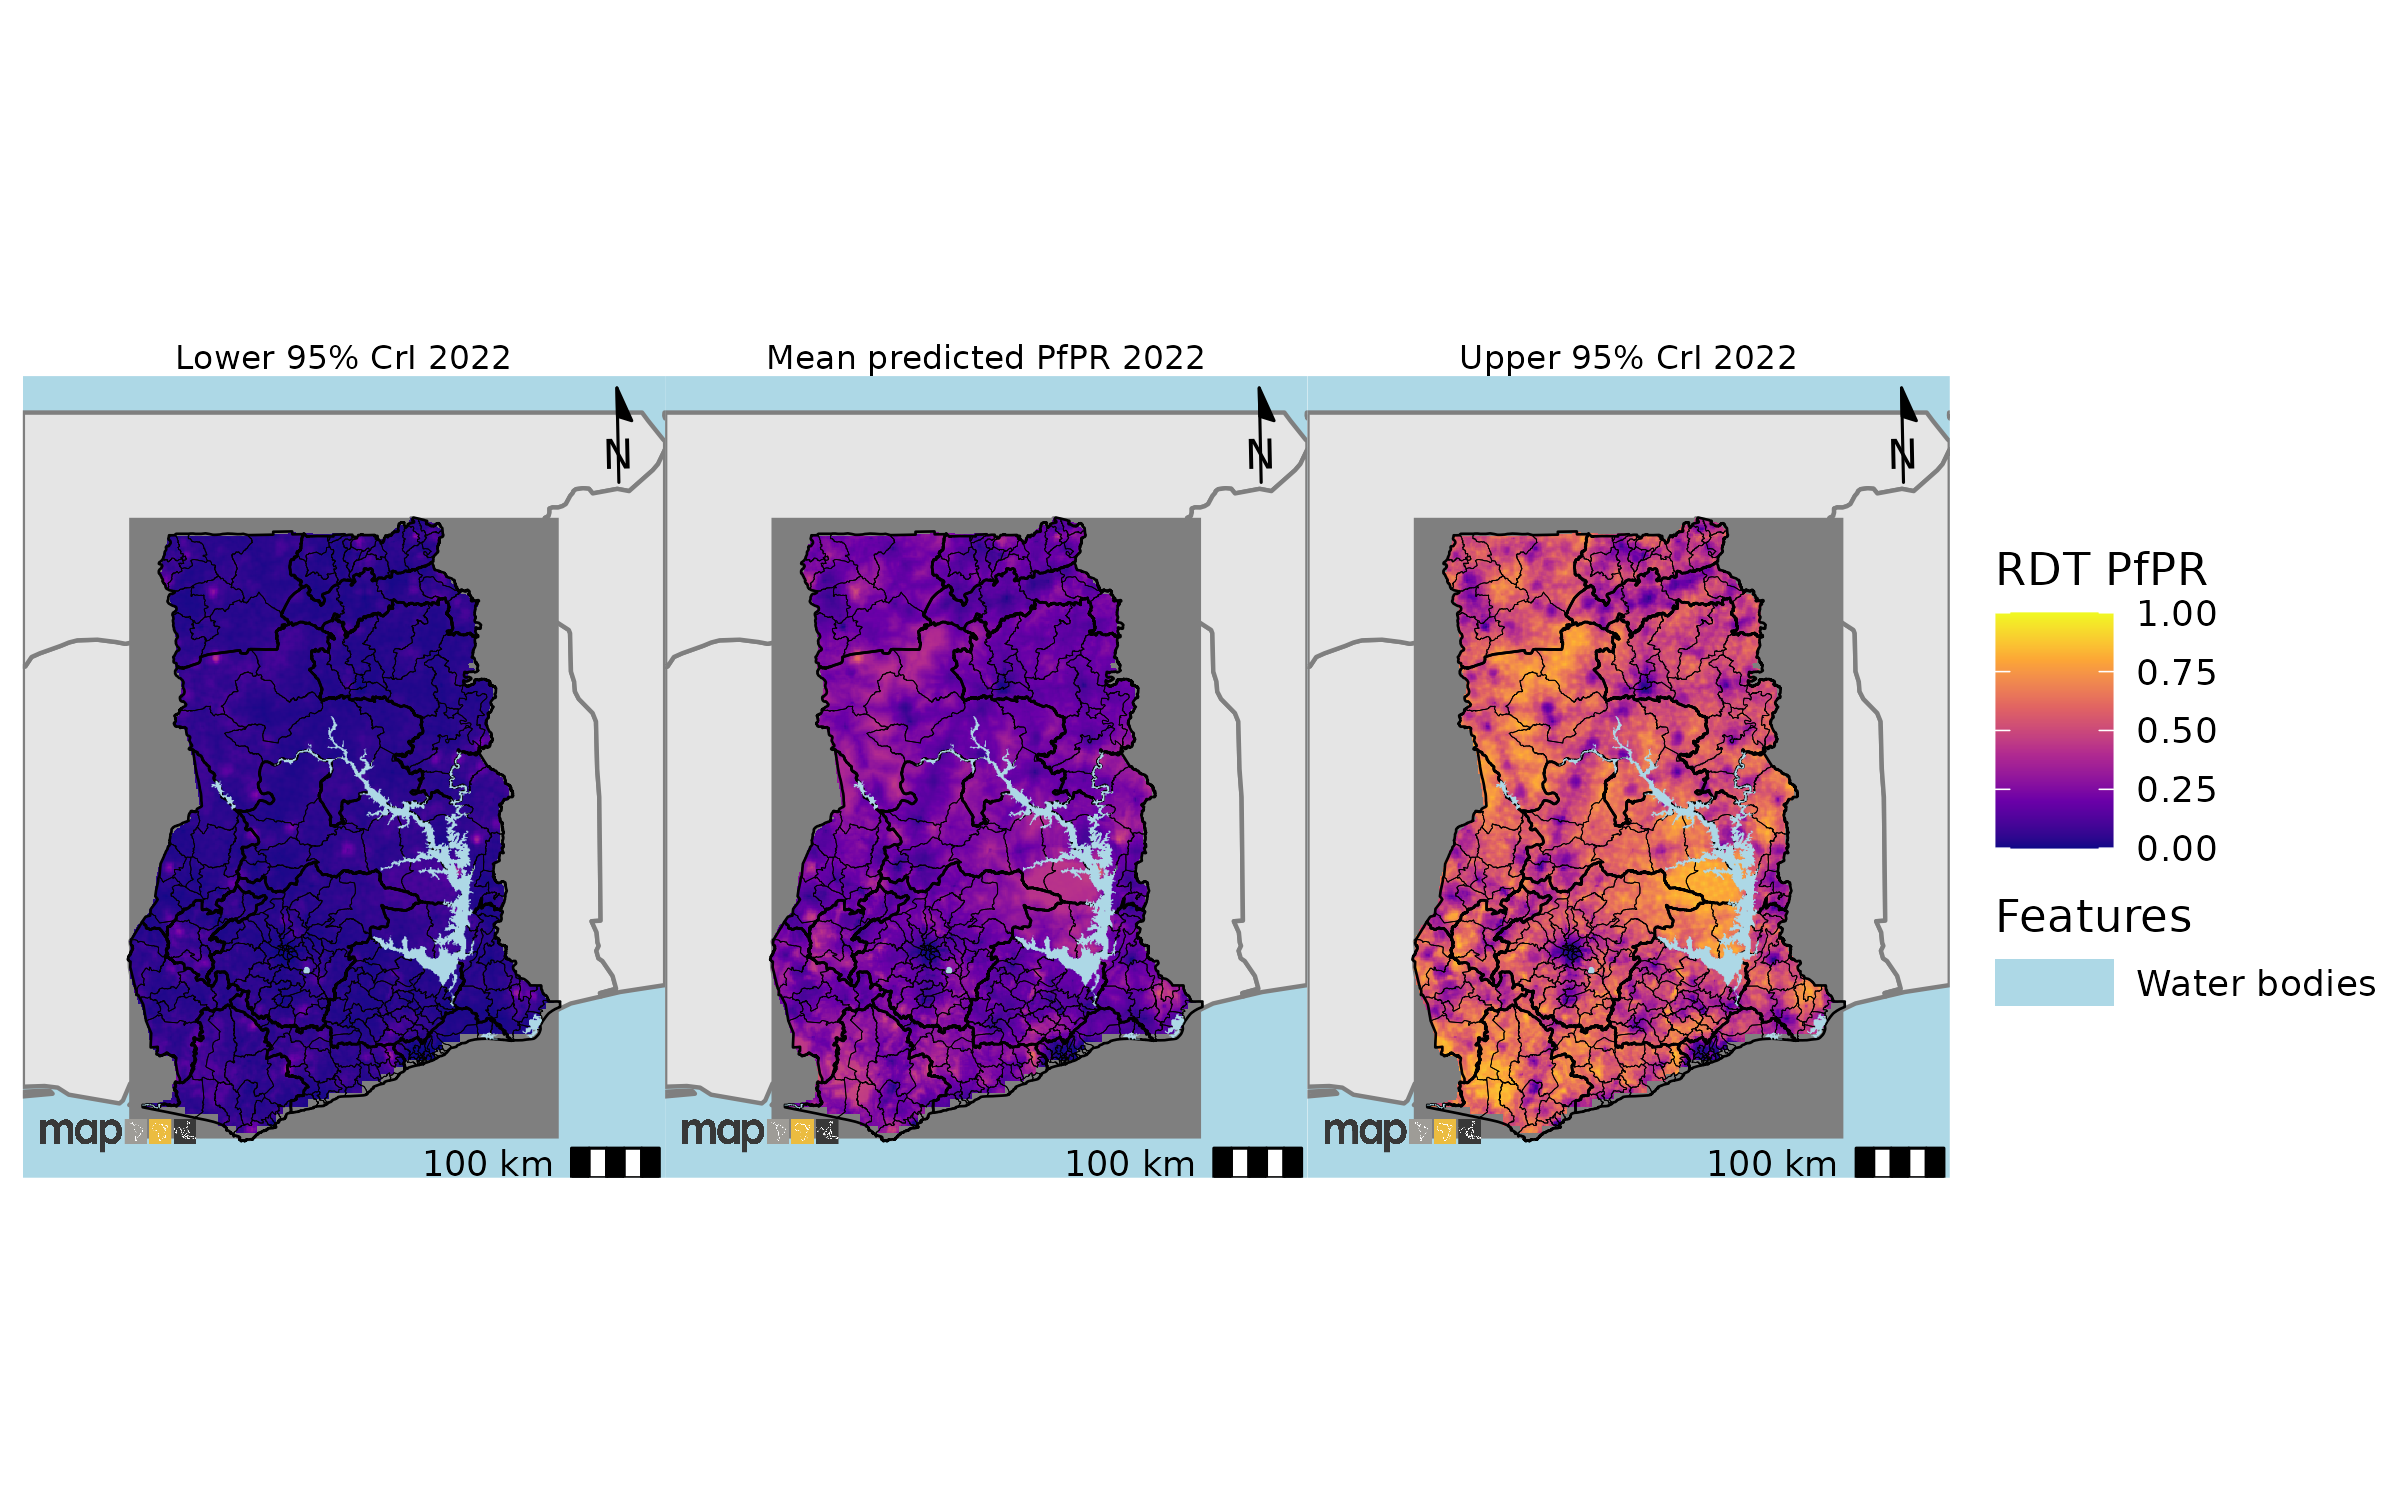 |
| 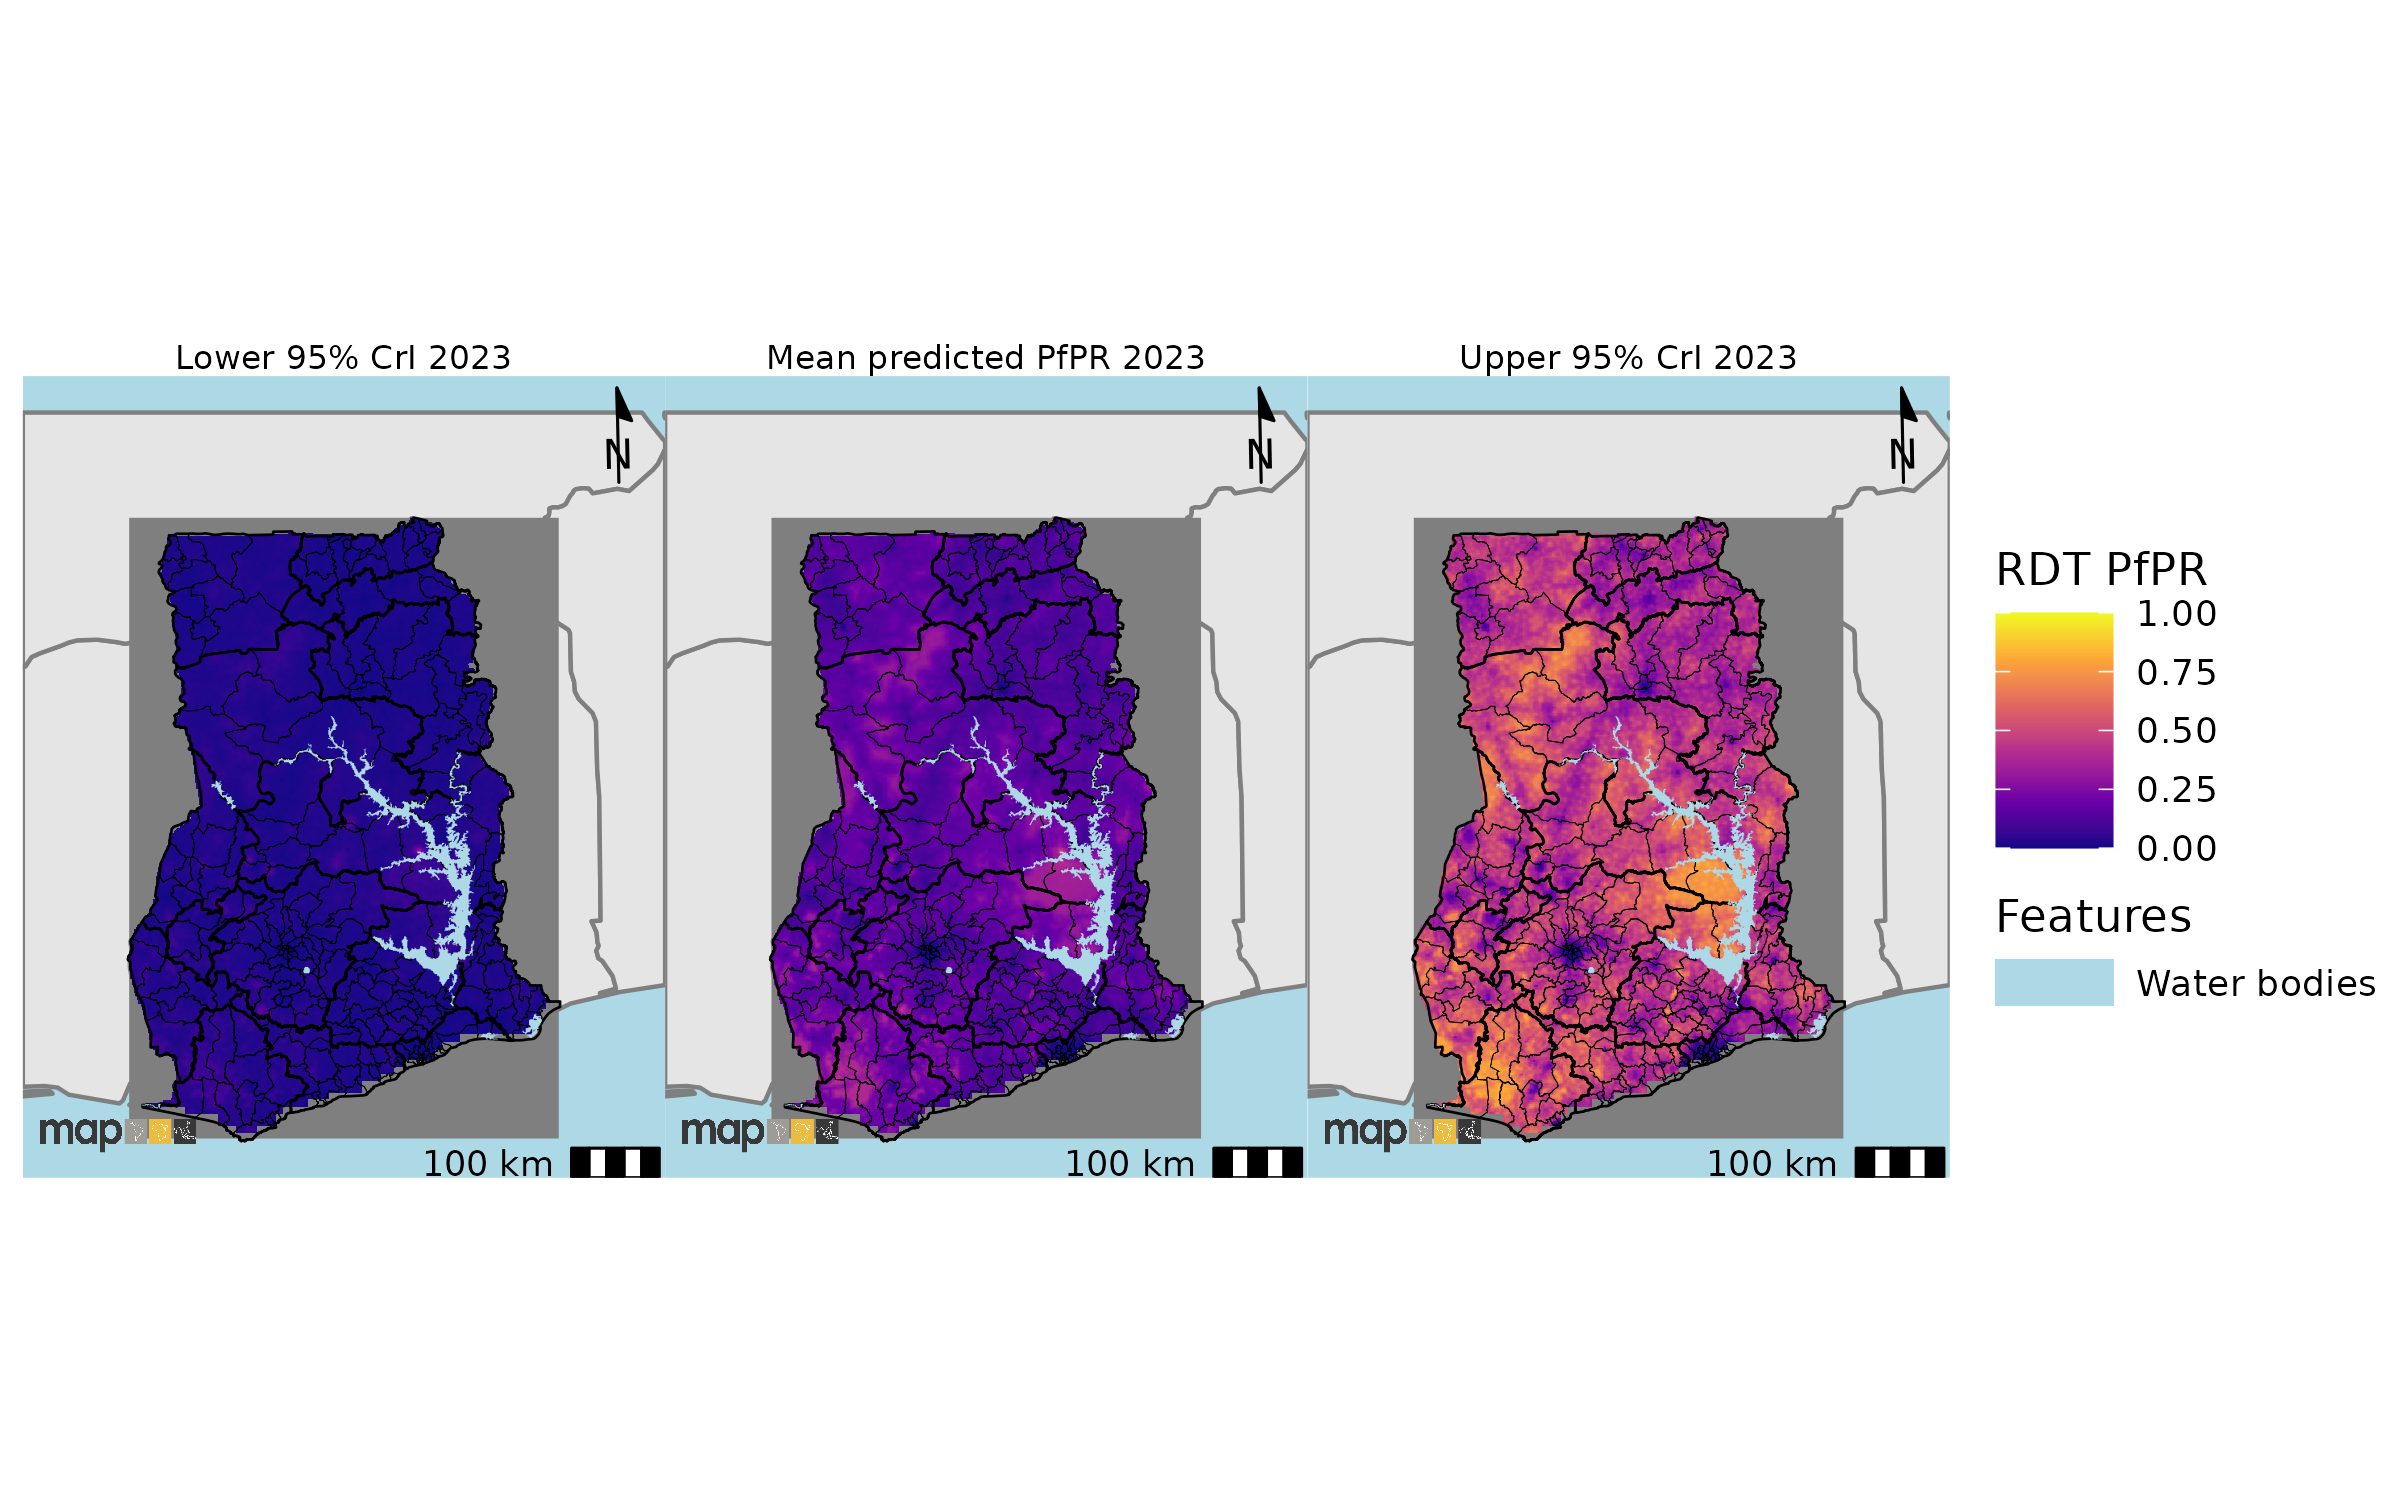 |
| 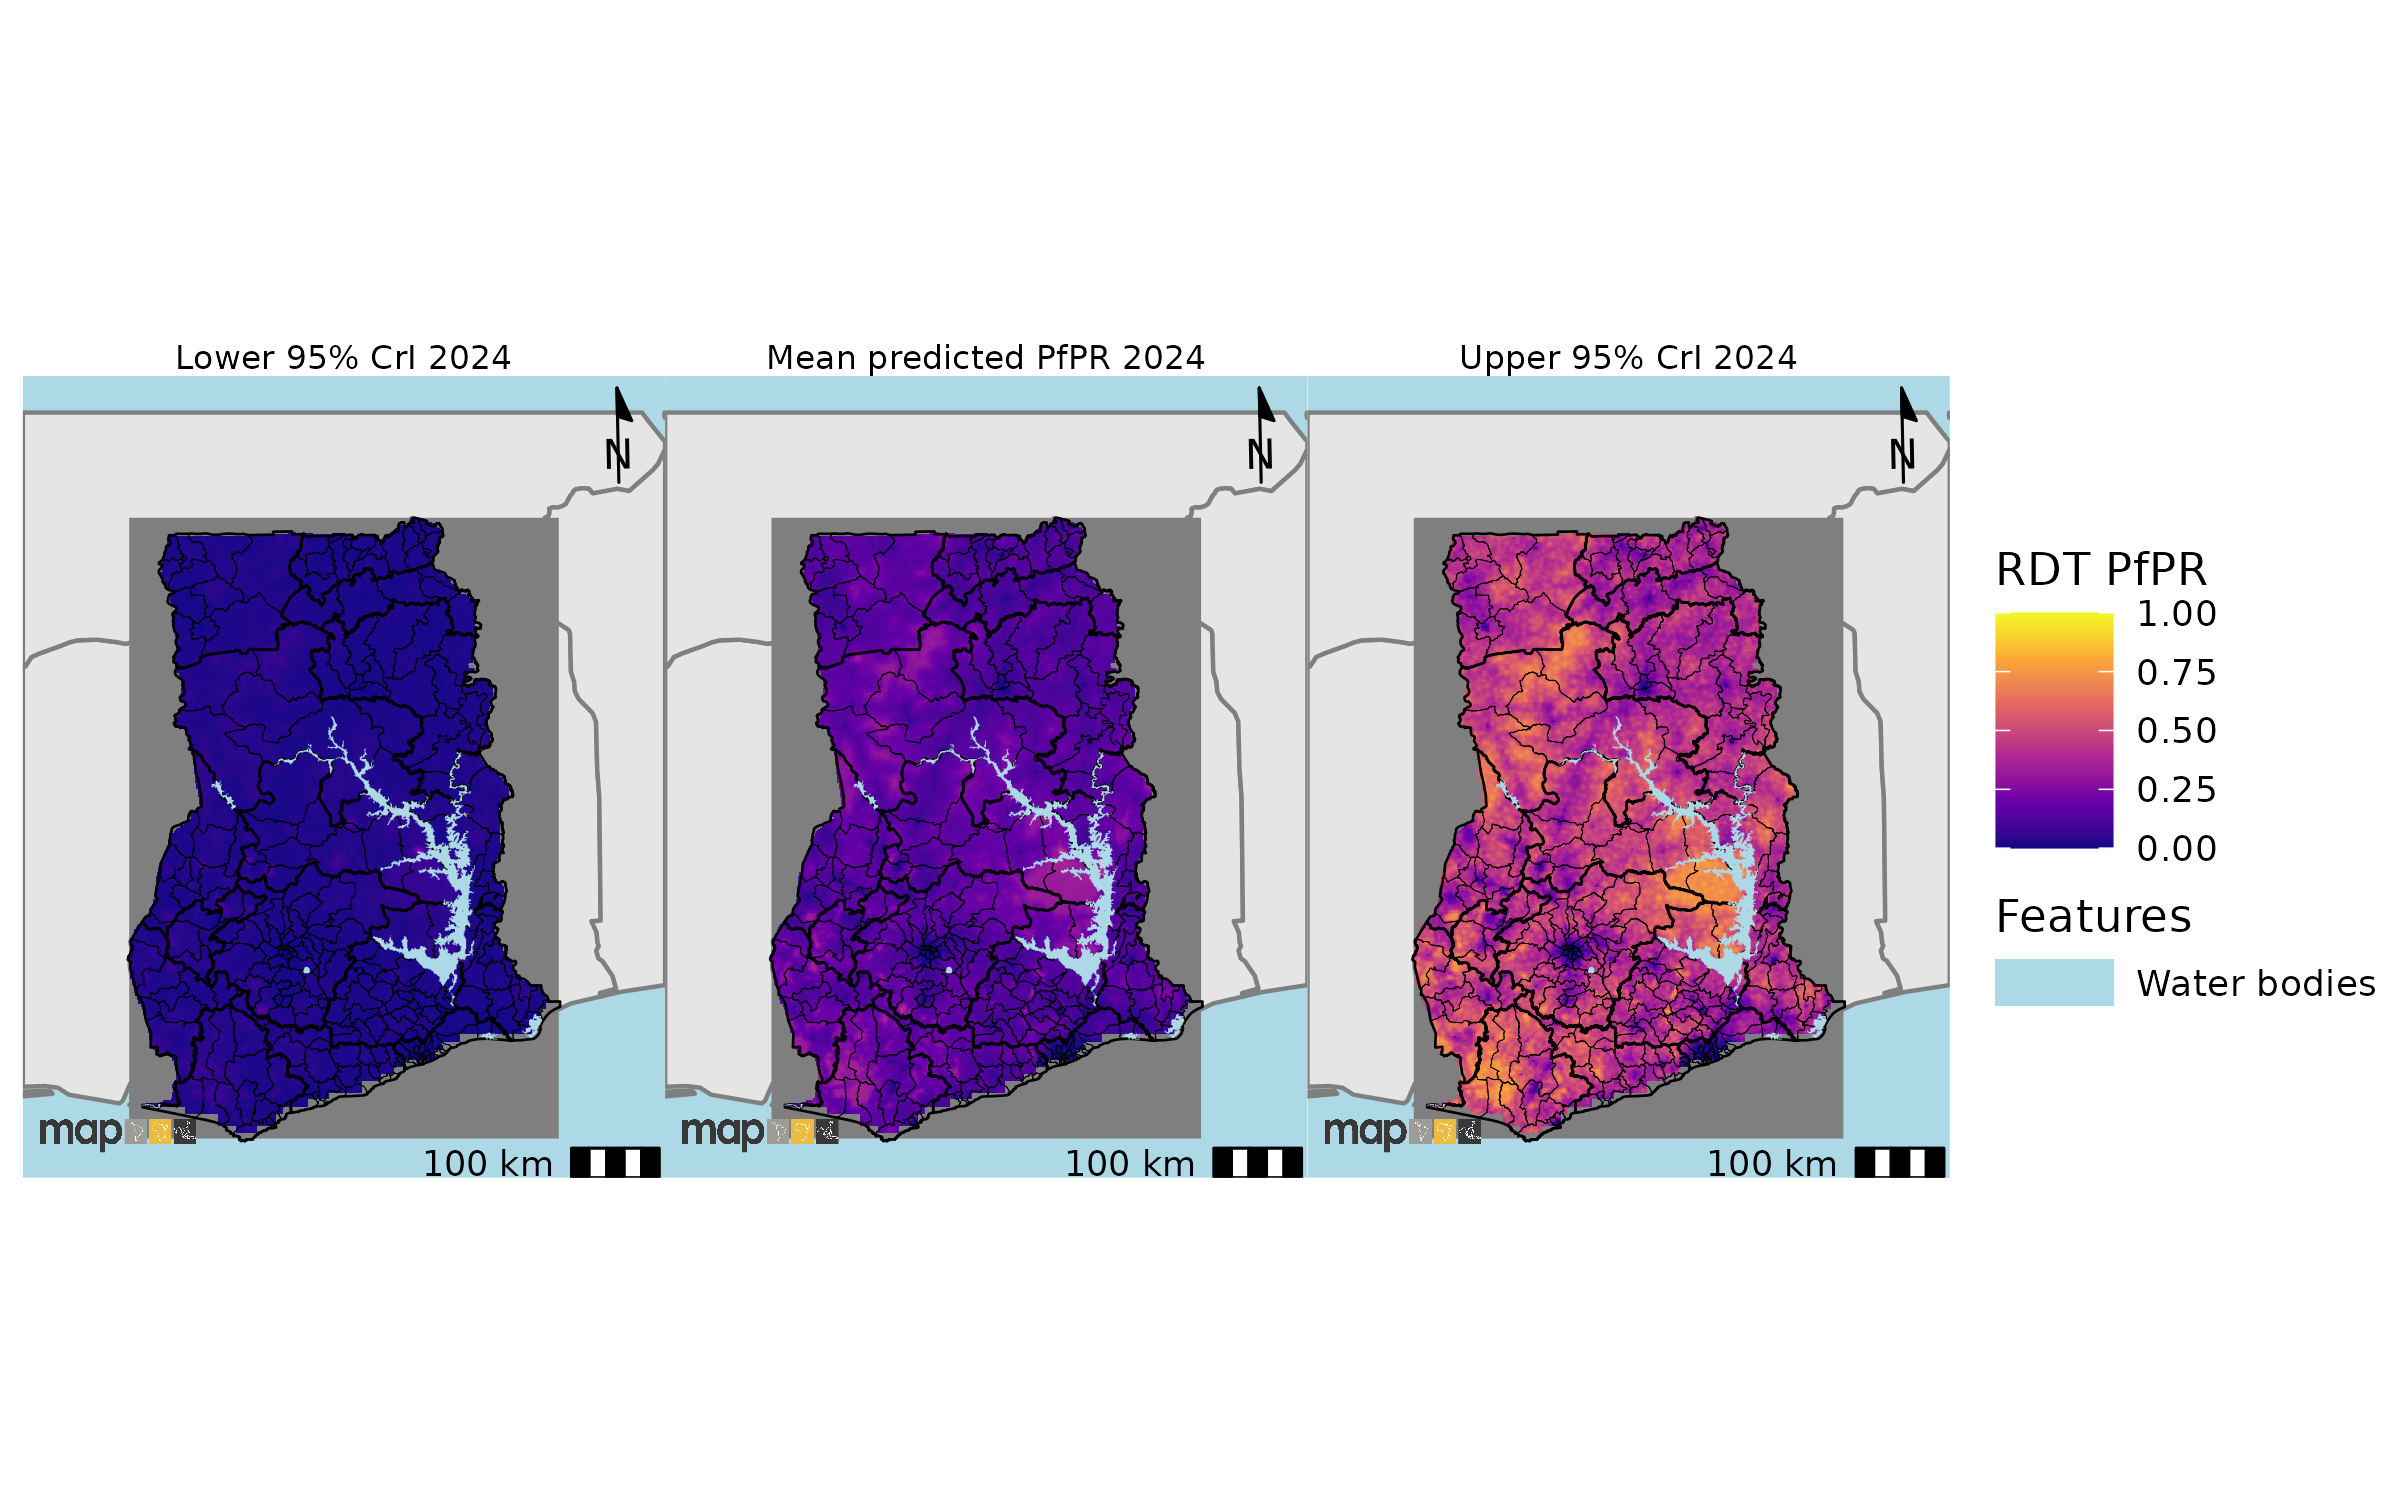 |
| 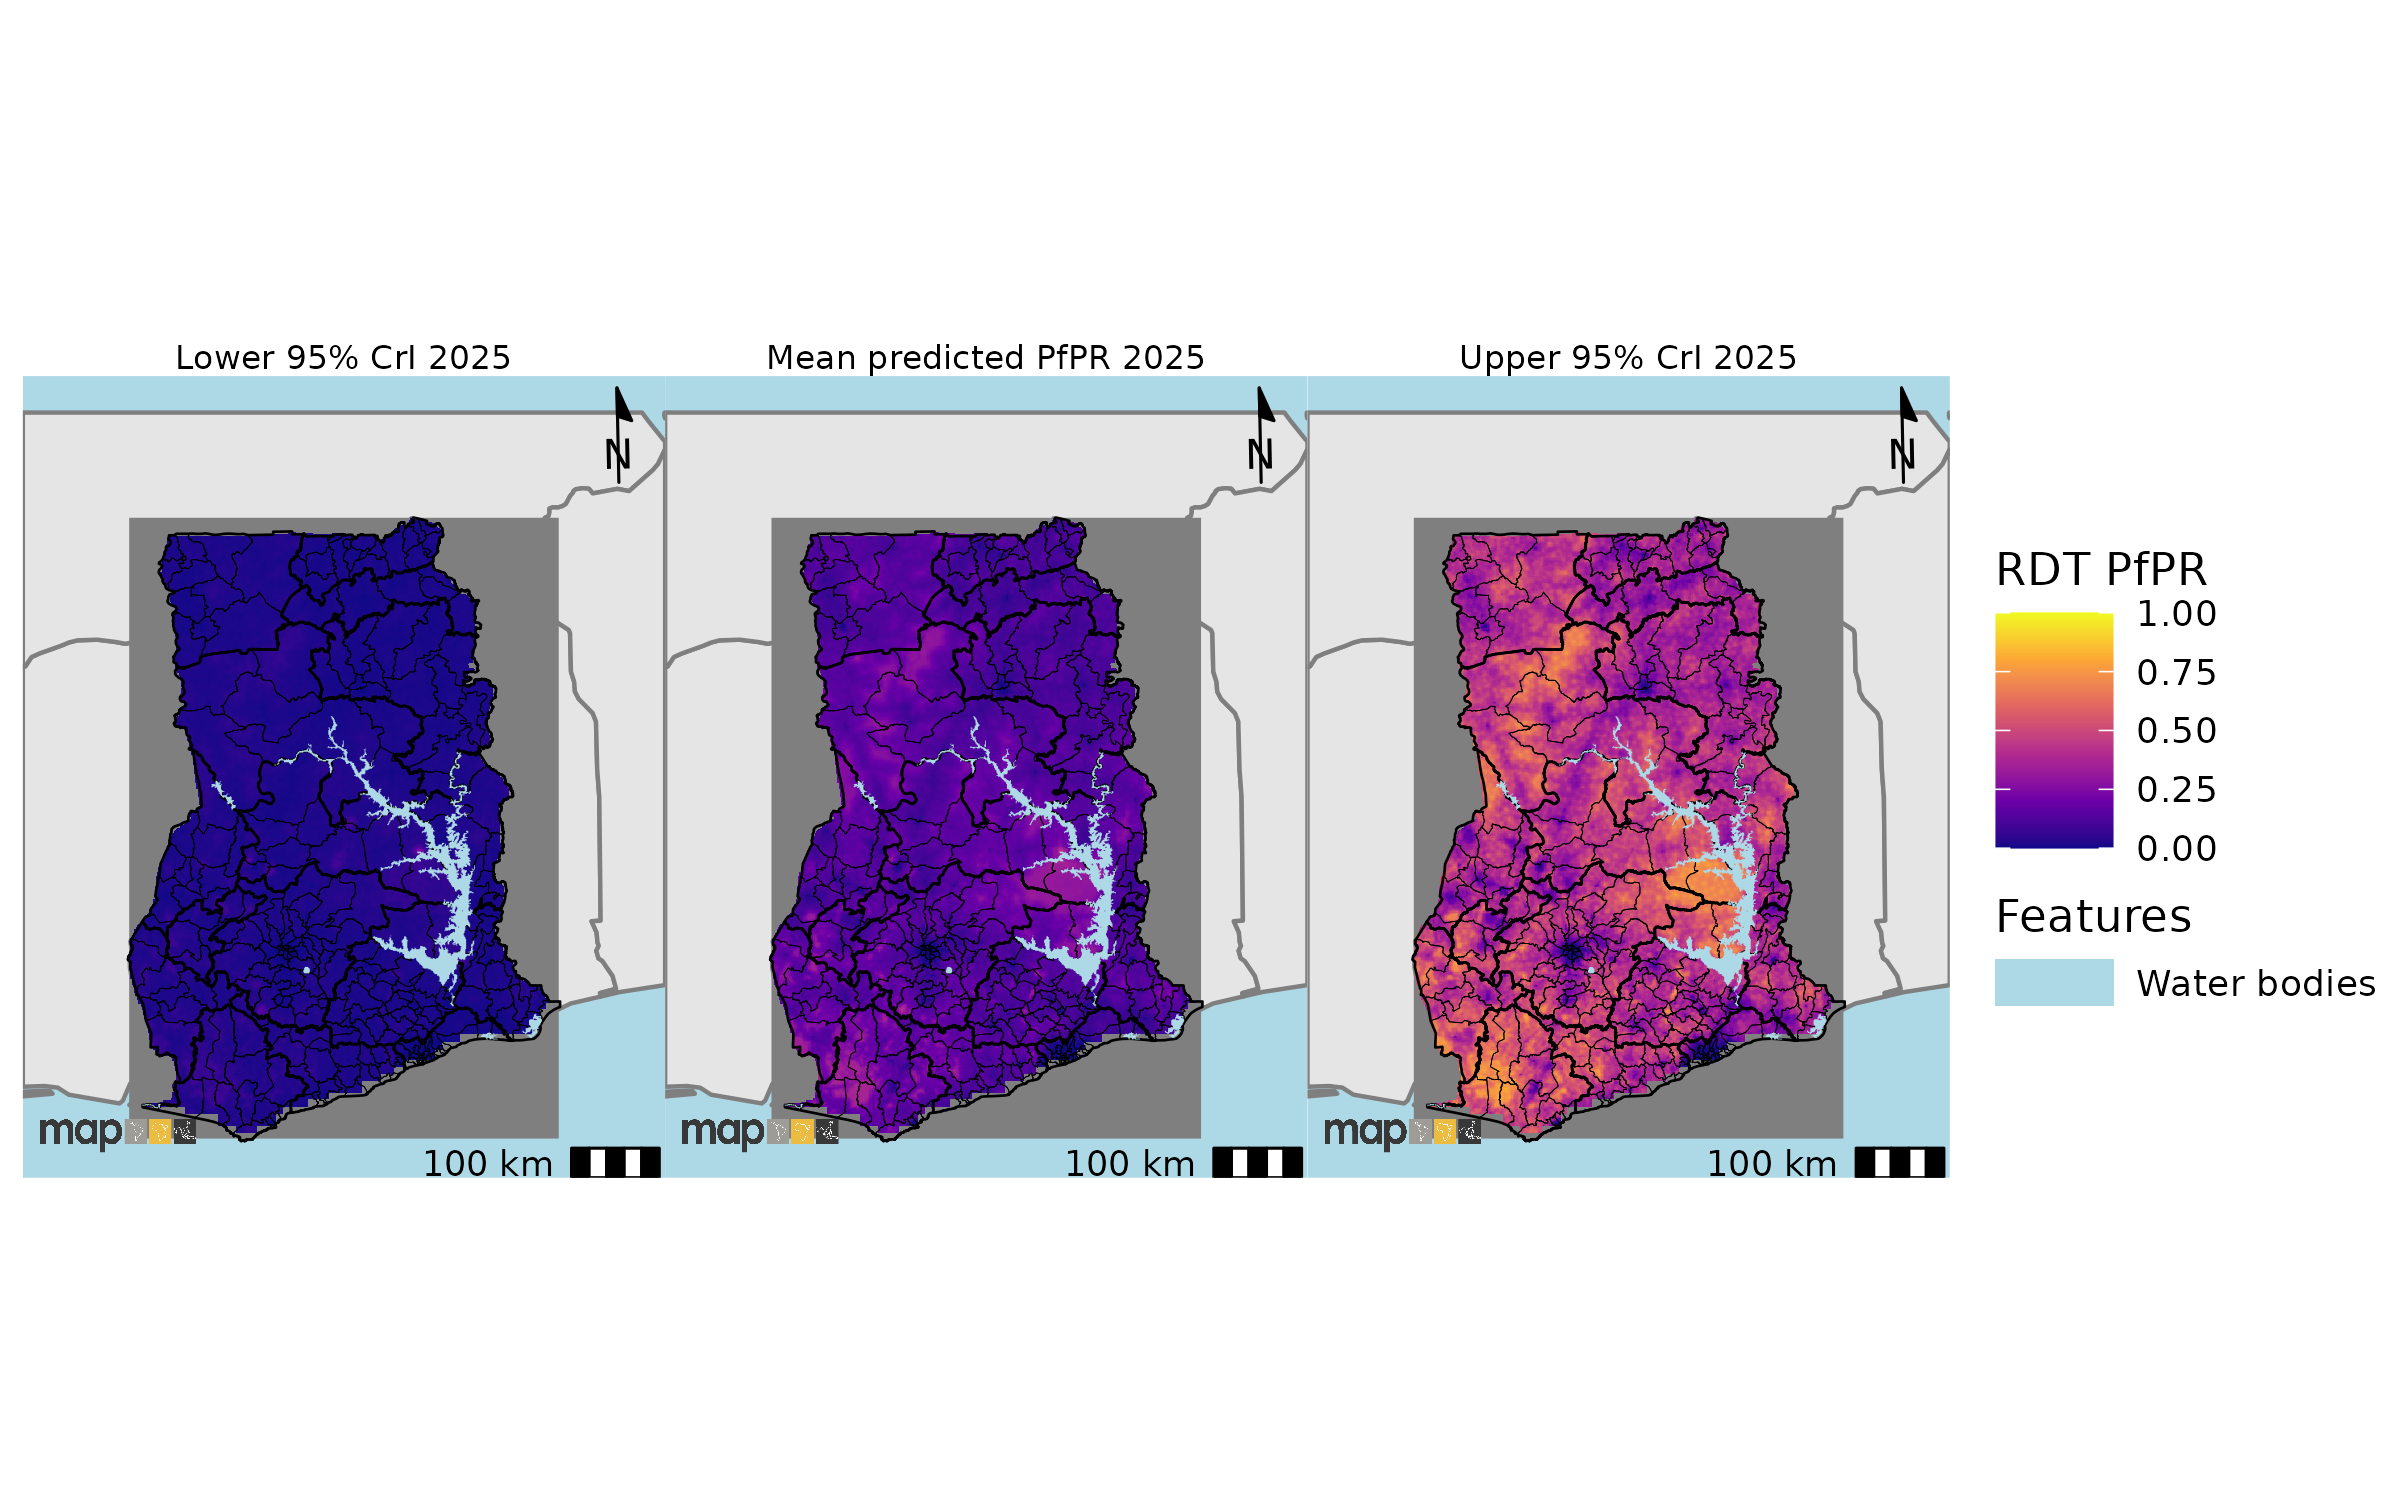  Supplementary figure 12: Prediction maps of P. falciparum malaria by RDT for Ghana from 2011 to 2025 with 95% credible intervals. There was general decline in malaria prevalence across the years. Few areas in the Western, Savannah and Eastern region (close to the Volta lake) showed relatively high prevalence |

## Stratification

Here we show the proportion of districts that fall into the various stratified categories for the two diagnostic methods.


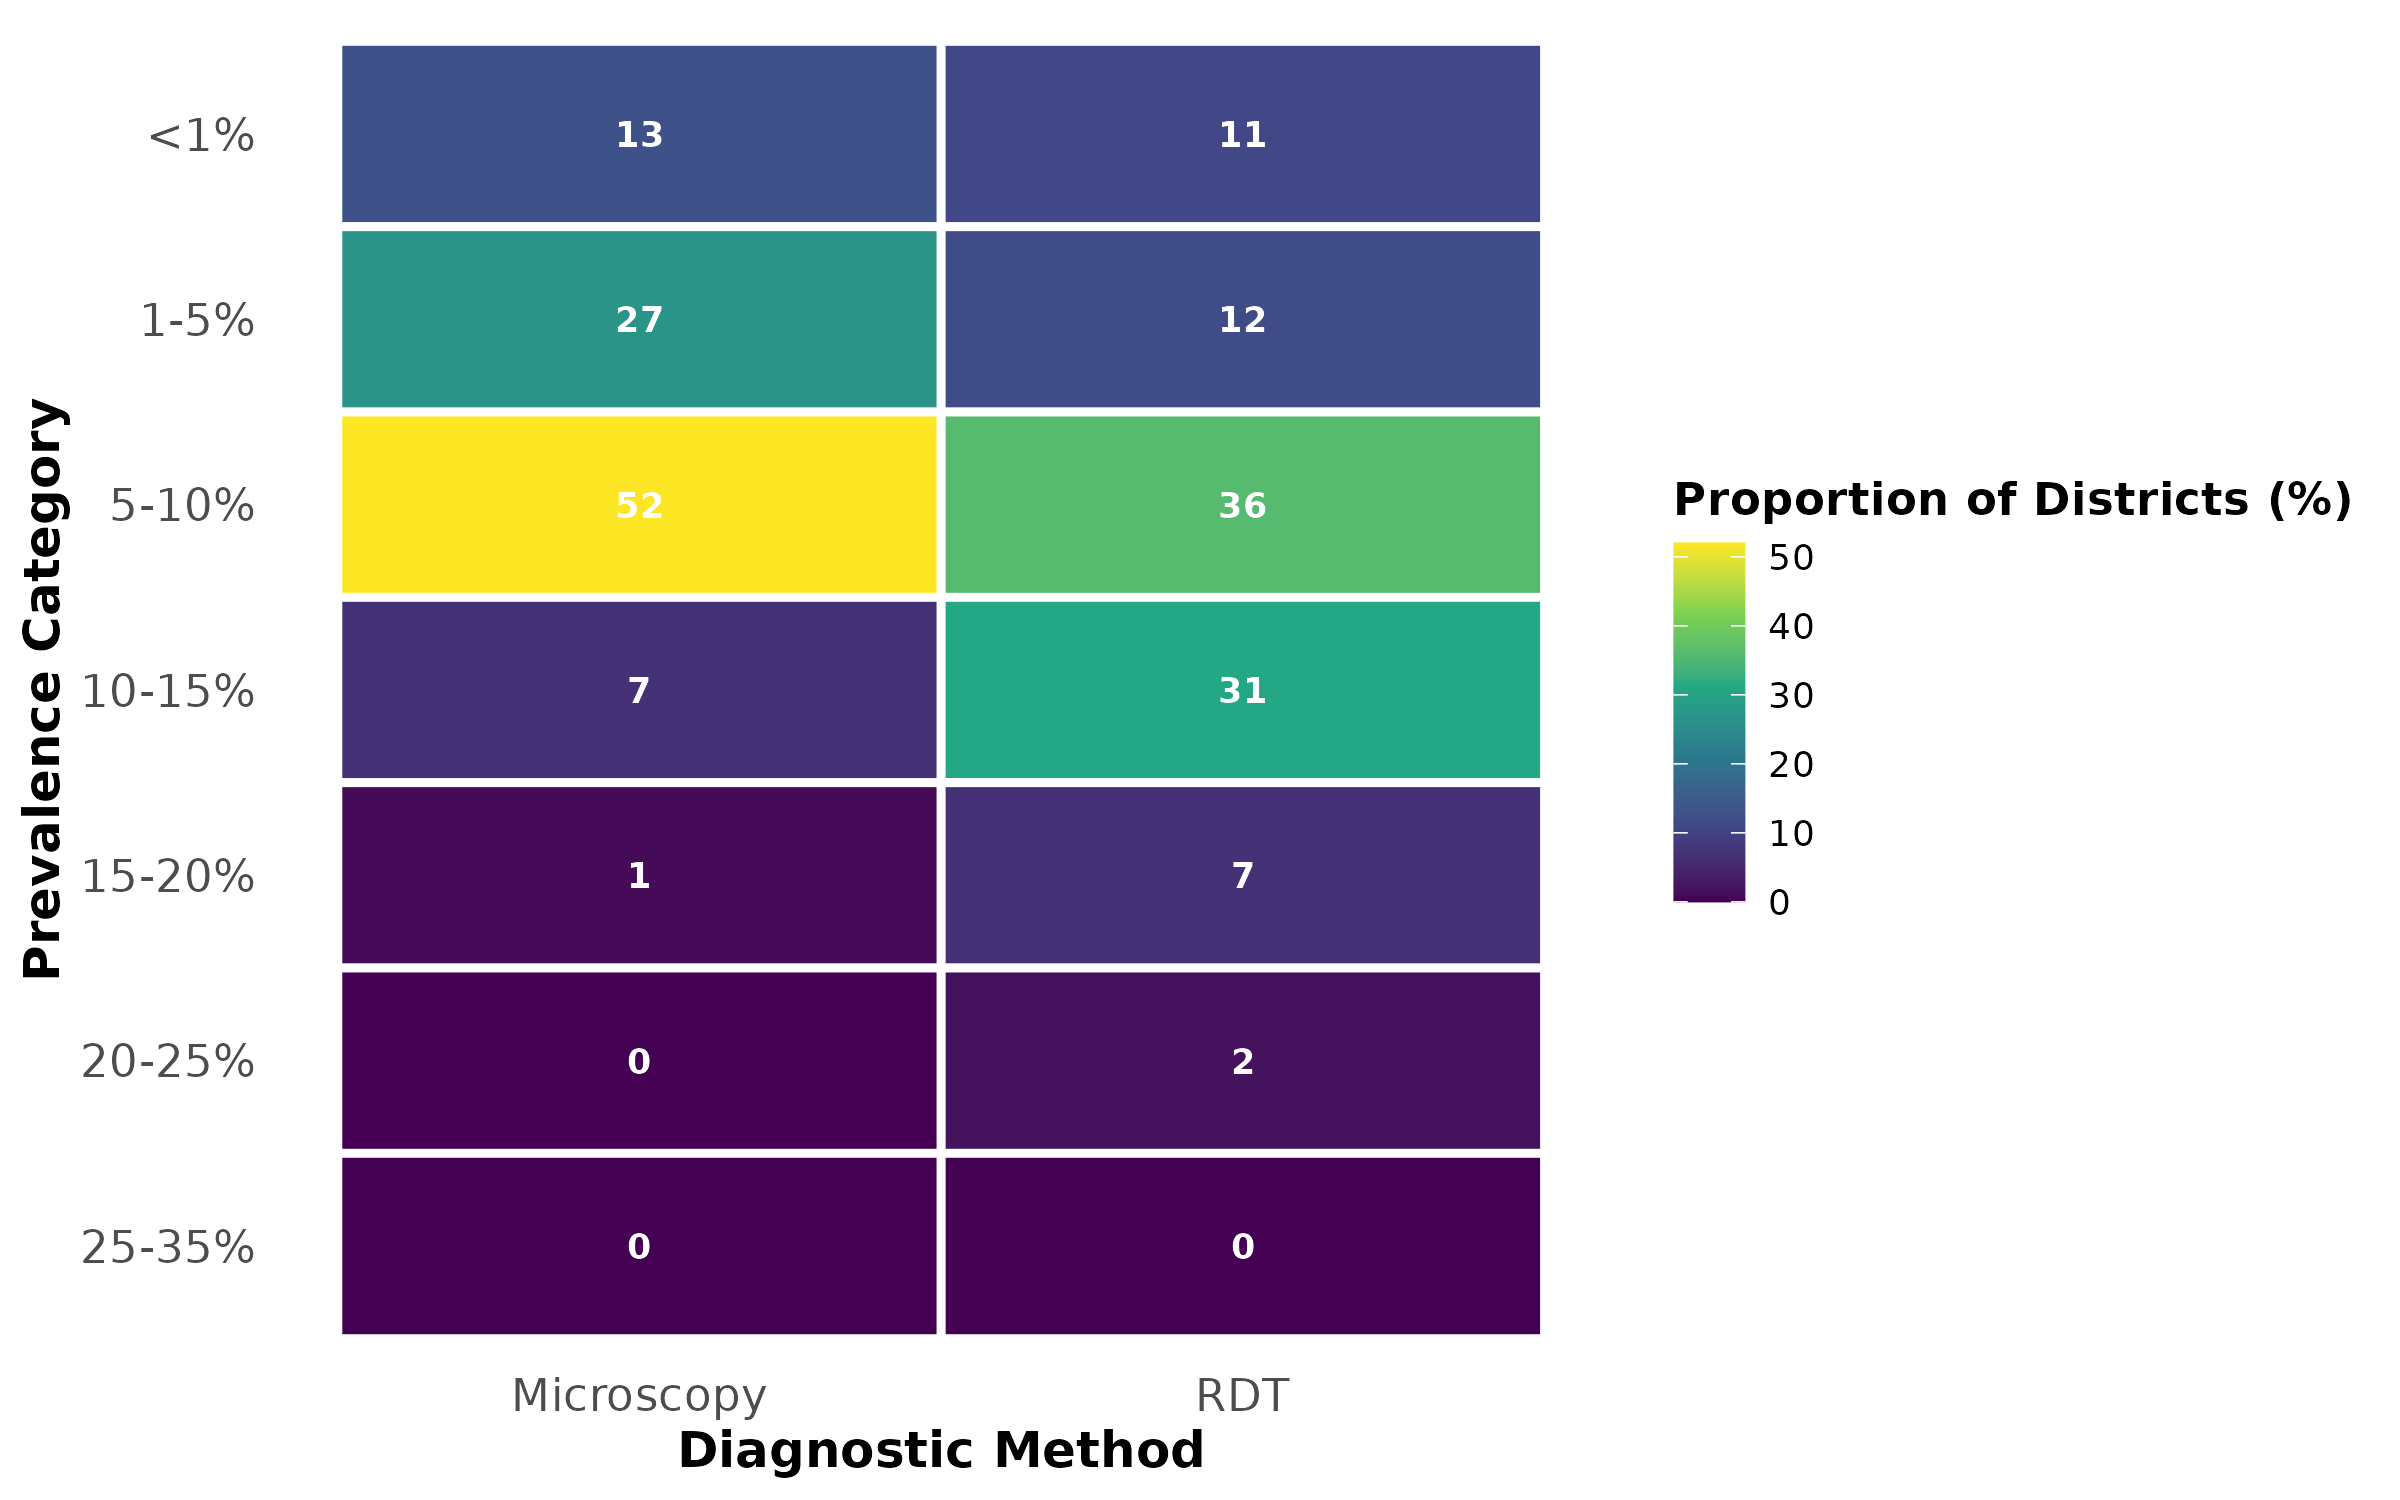


Supplementary figure 13: Proportion of districts in different prevalence categories for each method in 2025 in Ghana

# References

1. R Core Team (2024)., _R. R: The R Project for Statistical Computing. https://www.r-project.org/.

2. Nelson, A. *Travel Time to Major Cities: A Global Map of Accessibility*. (2008).

3. Farr, T. G. *et al.* The Shuttle Radar Topography Mission. *Rev. Geophys.* **45**, (2007).

4. VIIRS Nighttime Light. https://eogdata.mines.edu/products/vnl/.

5. Schiavina, M. Global Human Settlement - GHS-POP_GLOBE_R2023A - European Commission. https://human-settlement.emergency.copernicus.eu/ghs_pop2023.php.

6. WorldPop :: Population Counts. https://hub.worldpop.org/project/categories?id=3.

7. L, J. Enhanced Vegetation Index (EVI): A Modern Approach to Vegetation Health Monitoring. *Geospatial Artificial Intelligence | GeoAI* https://geoai.au/enhanced-vegetation-index-evi-a-modern-approach-to-vegetation-health-monitoring/ (2024).

8. Wan, Z., Hook, S. & Hulley, G. MODIS/Terra Land Surface Temperature/Emissivity 8-Day L3 Global 1km SIN Grid V061. NASA EOSDIS Land Processes Distributed Active Archive Center https://doi.org/10.5067/MODIS/MOD11A2.061 (2021).

9. Baig, M. H. A., Zhang, L., Shuai, T. & Tong, Q. Derivation of a tasselled cap transformation based on Landsat 8 at-satellite reflectance. *Remote Sens. Lett.* **5**, 423–431 (2014).

10. Weiss, D. J. *et al.* Air temperature suitability for Plasmodium falciparum malaria transmission in Africa 2000-2012: a high-resolution spatiotemporal prediction. *Malar. J.* **13**, 171 (2014).

11. Funk, C. C. *et al.* *A Quasi-Global Precipitation Time Series for Drought Monitoring*. *Data Series* https://pubs.usgs.gov/publication/ds832 (2014) doi:10.3133/ds832.
